# Supplementary material
Source: publisher figshare collection journal article supplement (https://gsajournals.figshare.com/ndownloader/files/14555726)
Supplement: Supplementary file 1 [file 14555726]

>Dr_teleost_FAT1A__ENSDARG00000017591_chr1_MTNR1Aa
NDLRPLFSPTAYSISLPENTAIRTSVAKVMATDADIGTNGEYYYSFEWTDMFSVHPTSGV
VTLTGKLDYSETKQYELEILAVDRGMKLYGSSGFSSMAKLTVRVDQANEHAPVITAVTLA
ASETDKDPTYAEIASLSVVAGDPLQQFEYQIKAVKQVDWDSQPFGYNLTLQAKDKGNPPQ
FSSAKVIHVMSPKFIQAIYRVNVSEFAPLHTPVVMVTAVPKYPQLKYAFRHRLDFAINPD
SGLITTAVTKVIIDVIDVNNNGPEFKQTSYKASLDENMPTGTSVLTVKATDLDSGENGYV
TYSIANSQPFVIDYFSGVISSSETLDYELMPRIYTLKVRASDWGSPYRREVETQVTIMLN
NLNDNKPLFENVDCDATVPRDHGVGDQITTVSAIDADELQLVRYRIKAGNDLNVFEMNPS
SGVLSLKQTLSLQIIASDGEHETQPMFLNITVCVDTGVASMLAEKLLHSVNRVAPQFTFP
SVIEVKEDLPVGARIVHLSASDSDSGFNGKLVYVISGGDAESRFIIDMDSGWLKVFAPLD
RETTDHYTLNITVYDLGIPQKSSSRLLDVKILDANDNSPQFLKYSVEISESSTVGTEVIQ
VEAKDKDLGDNGVVRYSILADTDQFAIDTETGIVTVKKPLDREVQPVFVLKIAARDQATA
EPQLVSTVLLKITLEDVNDNPPKFIPPNYHVRVREDLPIGTVIMWLEAHDPDVGPSSQVR
YSLIDSGDGKFEVDKLSGAVRIVQNLDYEKKQVYSLTAKAKDKGKPISLSSSCHIEVEVV
DVNENLYRPLFPSFVDKGFIKEDVPIGTSVMKITAQDEDKGRDGEIRYSIRDGSGLGIFT
IDEDTGVIRTQELLDHETVPHYWLTVYATDRGVVPLSSFVEVYIEVQDVNDNAPQTSEPV
YYPSVMESSPKDVSIIQIEAFDPDTKSNPQGFFSINQKTKLDREQQDEHILEITVSDQGV
PAKSTTVRVIVKVLDENDNSPQFMEKVYKIKLPVYRVIASDKDEGPNAEISYSIEEDEQG
KFFIEPKTGMVYSKLSSAVDYDILTIKAVDNGRPQKSATCRLHIEWIPKPPSTVPLVFDE
PFYTFSVMESDTVSHMLGVISLEGGNSDSRFEVGKASGTMIVAQALDAEQKSHYNLTVNA
TDGTRSVSTQVLIKVDTNNHRPQFSKPKYEVDVSEDTPPETEVLRITATDQDVRDQDIPV
KRNLVRVIVNVQDTNDNAPWFSGAPYVGRVFESAATGSAVLQVSALDKDKGQNAEIIYSI
ESGNVANSFAIDPVLGTITVAKELDRNNKNRFELTVKASDKGTPPLSGTAAVDITVTISD
NAIPKFAEKEFSAEVSETVLPGAFVSLVTANSQSSVFYQIKDGNVNGAFDINPNSGVVVT
HSVLDYETIPSYKLTIQGTNMAGLASNTTLLIHLKDENDNAPVFIQDQFAGMVSESSPVN
SVVLTKDNTPLVIRALDTDRDANSRLVYQIVEPFAHNYFAIDSSTGAIRTISELDYEQRS
VFRFSVQVHDMGIPRHFAEKAANVTIEILDVNDCPPQFSQDLYETTVLVPTYKGVEVITV
NASDADSRLFYSIVEGNEKFKMDPVTGVITIQNVTQLRSRYELRVRVSDGRFSKTSLVKI
NVRENKESTLRFTQESYKAFVPENSSEKKTLAVIAAVGNQVNEPLFYTILNPDKRFTISR
TSGVLSSTGTPFDREEQGVFDIVVEVTRDDKSPDVAHVLVTVIIEDVNDNPPVFVNLPYQ
ALVQVDADVDHIITKVTAVDADINENAEINYHLQELNEFVQISTGEISLTKKLDKDSVNE
FIITVVARDGGEPALSSSVEVPILVVNKAMPVFEKAFYSLEIPENIQLLTPIVHIQANDS
EGPRIVYTITEGDPLNQFTINFNTGVIQVVKTLDFETHPAYKLSVRATDSLTGAKAEVFV
DIILEDVNDNPPVFHTKLYNASLSEASVIGTSVLEVSATDADTGNNKVLFYQIVDYFSID
RDTGTIWTTRMLDHEEKPSHRLLIRAVDGGVPALSSEVMVLIDVMDLNDNTPVFSQNVYE
ATVSELAPRGHFVTQVQASDADISDLEFSILSGNEGQNFAMDPNTGALVISNHRKMESLY
NINVSVSDGVFRSSAIVKVNVISANFHNPTFNQVDYVVELLENSPVGTLVAATDDDSGTY
GRLTYHIVNDIAKDKFSISENGEIFTLESLDRENALEIPISLIAKDGGGKVGFCTVNVIL
TDINDNAPQFRAADYRVNVASDVSRGTTILKIAASDMDEGSNADITYEIHQFSGVIVTKE
SLIGLENQMYTFLVRAKDGGNPTKSSVVPVYVKILAPEVPVPKFIESHYRFAIEEDLSLG
YSLVKGNTPESNQDEVFVVDPSSGSLKLDKKLDHESTKWYQLTLQAQKVVSAVDISIQVK
DVNDNRPLFESNPYEAFVVENLPGGTSVIQVKATDLDSGTNGHVVYNLFAINSESGWITT
LKELDRETRNKYTVSVLATDRGDKVQLMASTRVDVTVVDVNDNPPKFTAEIYKGTVSEDD
PPGGVIAILSTTDLDTEENN
>Ss_XP_014064455
NDLRPLFSPTSYSISLLENTAIRTSVAKVTATDADIGTNGEYYYSFEWTDMFAVHPTSGV
VTLTGKLDHSETKLYDLEILAVDRGMKLYGSSGFSSMAKLTVRVEQANEHAPVITAVTLA
PSGADRDPTYAEIASLSVVAGDPLQQFEYKIKAVKDVDWDTQTFGYNLTLQAKDKGSPPQ
FSSAKVVHVTSPKFEHAVYRVNLSEFAPLHTPVAMVTALPKYPQLKYAFRYKAEFAINPD
TGLITTAVTKVIIDVIDVNNNAPEFQQTSYKATVDENVPVGTNVLAVKATDLDSGENGYV
TYSIANPQPFVIDYFSGVISTSEELDYELMPRIYNLKIRASDWGIPFRREVEASVTVTLN
NLNDNKPLFENVDCDVMVPRDHGVGEQITTVSAIDADELQLVRYDIKAGNDLDLFELNSN
SGVLSLKQTLSLHIRASDGEHETESMIMNITVCVDTGVATMLAEKLLHSVNRYSPQFSFP
SVIEVKEDLPVGARLVHLSASDTDSGFNGKLVYVISGGDTESRFIVDMNTGWLLVHTPLD
RETTDHYTLNVTVYDLGIPQKSSSRLLDVKILDANDNSPQFLQYSLEISENTPVGTEIIQ
VDSTDKDQGDNGVIRYSIVADTDQFAIDELTGVVTVKKPLDREVHPVYILKIAACDQAVN
EPQLVSTVLLKVILEDVNDNPPKFIPSNYSVKVREDLPIGTVIMWLEAHDPDVGLFSQVR
YSLIDNGDGNFDVDKVSGAVRILQNLNYEKKQVYNLTAKAKDKGKPISLSSTCFIEVDVV
DVNENLYRPWFPSFVDKGFIKEDVLIGTSVMKVSAQDEDKGRDGEIRYSIRDGSGLGIFT
IDEETGVIRTQELLDHETTQHYWLTVYATDGGVVPLSAFVEVYVAVQDVNDNAPQTSEPV
YYPSVAENSPKDVSIIQIEAVDPDARANPQGFFAINSKMKLDREQQDEHILEITVTDHGV
PAKSTTVRVIVKVLDENDNRPQFLEKIYKIKLPEYRVIASDRDEGANSEISYSIEEDEHG
KFFIEPKTGLVSSKFSSAGEYDILTIKAVDNGRPQKSSTCRLHIEWIPKPASAPPLAFEE
PPFFFSVMESDPVAHMVGVIITEGGNYDSRFDVGKASGTLIVARPLDAEQKSNYNLTVEA
TDGTRFVSTQVLIRVDTNNHRPQFSQPRYEVVVAEDTPPETEVLRIGATDEDVRDQDIPV
KRNLVRVIVDVEDTNDNAPWFVGSPYSGRVFESAALGSAVLQVTALDKDKGQNAEVIYSI
ESGNVANSFAIDPVLGTVTVAKELDRSSKNQFELAVKATDKGTPSLTATATVHIAVTVSD
NATPRFTAKEFSAEVSELALPGSFVTMITATSQSSVFYQIKGGNTDGAFDVNPNSGVVVT
SRALDYEMTPEYRLTIQGTNMAGLASNTTLLIHLKDENDNAPIFLQPEFTGMISESASIN
SVVLTRENTPLVIRALDADRDANAMLVYQIVEPFAHNYFAIDSSTGAIRMTTTLDYEQRS
VFRFTIQVHDLGIPRLFAETAANVTVEVIDVNDCPPQFSQELYETSVIVPTYKGVEVIKV
NASDADSKLFFSISEGNEKFKMHPNTGIITIQNVTQLRSRYELRVRVSDGRFANTASIKI
NIRENKESSLKFTRDSYKAYVKENSSEKKTLAVIAAVGNHINEPLFYTVLNPDKRFKISR
TSGVLSTTGIPFDREAQDTFDLVVEVTREDASSEVAHVLVTVIVEDVNDNQPMFVNLPYQ
ALVQMDAEEGQAIRQVTAVDRDMGQNAEIHYHLKEHHKHFQISPGEISLRKQLDKDSLNE
FVINVVAKDAGEPALSAEVEVPITIVNKAMPVFEKAFYSIEIPENIQLHTPVVHVQATDS
EGPKIVYTISEGDAFSQFSINFNTGVIHVIQPLDFEIHPAYKLSVRATDSLTGAHADVFV
DIILEDVNDNPPVFQLKSYNASVSEASFIGTAVLQVAATDFDTGNNKMLFYQLVDYFSID
RDLGIIWTARMLDQEEKQQHKLTVRAVDGGVPALSSHVTVTIDVTDLNDNAPVFTESSYK
ATVSELAPRGYFVTHVQASDADSSDLEFSILSGNKDQNFAMDKNTGAIVISNHRKMEPLY
NLNVSVSDGVFRTSAMVKVTVNGANFHNPTFPQLDYVVELTENSPVGTLVAATDEDAGTY
GGLTYHIVNDFAKDKFSVNENGEIFTLEILDRENAIEIPISLMAKDGGGKVGFCIINVIL
TDINDNAPQFMAVEYKANVASDVPRGTTVVKIAASDMDEGSNADIAYEIHPFSGVIVTKE
SLIGLENDLYAFYVRAKDAGSPSKQSVVRVYIRIVAPEVPVPKFAEPHYRFTIAEDMLIG
YSLVKGNTPESNQNEVFVVDRDTGALKLEKSMDHETTKWYQLTLQAQETVASVDINIQVK
DLNDNKPVFESDPYEAVVVENLPDGTPVIQVKATDQDSGTNGQVIYSLFAVNSETGWVTT
LKELDREKTSKYTIAVLATDRGDKVQLVTSATVEVTVADVNDNPPRFTAEIYKGTVSEDD
PPSGVIAILSTTDADTEEIN
>Om_XP_021429244
NDLRPLFSPTSYSVSLLENTAIRTSVAKVTATDADIGTNGEYYYSFEWTDMFAVHPTSGV
VTLTGKLDHAETKLYDLEILAVDRGMKLYGSSGFSSMAKLTVRVEQANEHAPVITAVTLA
PSGTDRDPTYAEIASLSVVAGDPLQQFEYKIKAVKDVDWDTQTFGYNLTLQAKDKGSPPQ
FSSAKVVHVTSPKFERAVYRVNLSEFAPLHTPVAMVTALPKYPQLKYAFRYKAEFAINPD
TGLITTAATKVIIDIIDVNNNAPEFQRTSYKATVDENVPVGTNVLAVKATDLDSGENGYV
TYSIANPQPFVIDYFSGVISTSEELDYELMPRIYNLKIRASDWGTPFRREVEASVTVTLN
NLNDNKPLFENVDCEVTVPRDHGVGEQITTVSAIDADELQLVRYDIKAGNDLDLFELNSN
SGVLSLKRTLSLHIRASDGEHETEPMTMNITVCVDTGVATMLAEKLLHSVNRYSPQFSFP
SVIEVKEDLPVGARVVHLSASDTDSGFNGKLVYVISGGDTESRFIVDMNTGWLLVHTPLD
RETTDHYTLNVTVYDLGIPQKSSSRLLDVKILDANDNSPQFLQYSLEISENTPVGTEIVQ
VDSTDKDQGDNGVIRYSIVADTDQFAIDELTGVVTVKKTLDREVHPVYILKIAARDQAVN
EPQLVSTVLLKVILEDINDNPPKFIPSNYGVKVREDLPIGTVIMWLEAHDPDVGLFSQVR
YSLIDNGDGNFDVDKVSGAVRILQNLDYEKKQVYNLTAKAKDKGKPISLSSTCFIEVDVV
DVNENLYRPWFPSFVDKGFIKEDVLIGTSVMKVTAQDEDKGRDGEIHYSIRDGSGLGIFT
IDEETGVIRTQELLDHETTPHYWLTVYATDGGVVPLSAFVEVYVEVQDVNDNAPQTSEPV
YYPSVAENSPKDVSIIQIEAVDPDARANPQGFFAINSKMKLDREQQDEHILEITVTDHGV
PAKSTTVRVIVKVLDENDNRPQFLEKIYKIKLPEYRVIASDRDEGANSEISYSIEEDEHG
KFFIEPKTGLVSSKFSSAGEYDILTIKAVDNGRPQKSSTCRLHIEWIPKPASAPPLAFEE
PPFFFSVMESDPVAHMVGVITTEGGNYDSRFDVGKASGTLIVARPLDAEQKSNYNLTVAA
TDGTRFVSTQVLIRVDTNNHRPQFSQPRYEVVVAEDTPPETEVLRIGATDEDVRDQDIPV
KRNLVRVIVDVADTNDNAPWFAGSPYSGRVFESAALGSAVLQVTALDKDKGQNAEVIYSI
ESGNVANSFAIDPVLGTVTVAKELDRSSNNQFELAVKATDKGTPSLTATATVHIAVTVSD
NATPRFTAKEFSAEVSELALPGSFVTMITATSQSSVFYQIKGGNTDGAFDVNPNSGVVVT
SRALDNEMTPEYRLTIQGTNMAGLASNTTLLIHLKDENDNAPIFLQPEFTGMISELAPIN
SVVLTRENTPLVIRASDADRDANAMLVYQIVEPFAHNYFAIDSSTGAIRMTTTLDYEQRS
VFRFTIQVHDLGIPRLFAETAANVTVEVIDVNDCSPQFSQELYETSVIVPTYKGVEVIKV
NASDADSKLFFSISEGNEKFKMDSNTGIITIQNVTQLRSRYELRVRVSDGRFANTASIKI
NIRENKESSLKFTRDSYKAYVKENSSEKKTLAVIAAVGNHINEPLFYTVLNPDKRFQISR
TSGVLSTTGIPFDREAQDTFDLVVEVTREDASAEVAHILVTVIVEDVNDNQPMFVNLPYQ
ALVQVDAEEGQAIRQVTAVDGDVGQNAEIHYHLKEHHKHFQISPGEISLKQQLDKDSLNE
FVINVVAKDAGEPALSAEVEVPITIVNKAMPVFEKAFYSIEIPENIQLHTPVVHVQATDS
EGPKIVYTISEGDAFSQFSINFNTGVVHVIQPLDFEAHPAYKLSVRATDSLTGAHADVFV
DIILEDVNDNPPVFQLKSYNANVSEASFIGTAVLQVAATDSDTGNNKMLFYQLVDYFSID
RDLGIIWTARMLDQEEKQQHKLTVRAVDGGVPALSSDVTVTIDVTDLNDNAPVFTERSYK
ATVSELAPRDYFVTHAQASDADSSDLEFSILSGNKDQNFAMDKNTGAIVISNHRKMEPLY
NLNVSVSDGVFRTSAMVKVTVNGANFHNPTFPQLDYVVELTENSPVGTLVAATDKDAGTY
GSLTYHIVNDFAKDKFSVNENGEIFTLEILDRENAIEIPISLMAKDGGGKVGFCIINVIL
TDINDNAPQFRAVEYKANVASDVPRGTTVVKIAASDMDEGSNADIAYEIHPFSGVIVTKE
SLIGLENNLYAFYVRAKDAGSPSKQSVVRVYIRIVAPEVPVPKFAEPHYRFTIAEDMPIG
YSLVKGNTPESNQNEVFVVDRDTGALKLEKSMDHETTKWYQLTLQAQETVAFVNINIQVK
DLNDNKPVFESDPYEAVVVENLPDGTPVIQVKATDQDSGTNGQVIYSLFAINSETGWVTT
LKELDREKTSKYSIAVLATDRGDKVQLVTSATVKVTVADVNDNPPRFTAEIYKGTVSEDD
PPSGVIAILSTTDADTEEIN
>Ok_XP_020343010
NDLRPLFSPTSYSVSLLENTAIRTSVAKVTATDADIGTNGEYYYSFEWTDMFAVHPTSGV
VTLTGKLDHAETKLYDLEILAVDRGMKLYGSSGFSSMAKLTVRVEQANEHAPVITAVTLA
PSGTDRDPTYAEIASLSVVAGDPLQQFEYKIKAVKDVDWDTQTFGYNLTLQAKDKGSPPQ
FSSAKVVHVTSPKFERAVYRVNLSEFAPLHTPVAMVTALPKYPQLKYAFRYKAEFAINPD
TGLITTAATKVIIDIIDVNNNAPEFQRTSYKATVDENVPVGTNVLAVKATDLDSGENGYV
TYSIANPQPFVIDYFSGVISTSEELDYELMPRIYNLKIRASDWGTPFRREVEASVTVTLN
NLNDNKPLFENVDCEVTVPRDHGVGEQITTVSAIDADELQLVRYDIKAGNDLDLFELNAN
SGVLSLKRTLSLHIRASDGEHETEPMTMNITVCVDTGVATMLAEKLLHSVNRYSPQFSFP
SVIEVKEDLPIGARVVHLSASDTDSGFNGKLVYVISGGDTESRFIVDMNTGWLLVHTPLD
RETTDHYTLNVTVYDLGIPQKSSSRLLDVKILDANDNSPQFLQYSLEISENTPVGTEIVQ
VDSTDKDQGDNGVIRYSIVANTDQFAIDELTGVVTVKKPLDREVHPVYILKIAARDQAVN
EPQLVSTVLLKVILEDVNDNPPKFIPSNYSVKVREDLPIGTVIMWLEAHDPDVGLFSQVR
YSLIDNGDGNFDVDKVSGAVRILQNLDYEKKQVYNLTAKAKDKGKPISLSSTCFIEVDVV
DVNENLYRPWFPSFVDKGFIKEDVLIGTSVMKVTAQDEDKGRDGEIHYSIRDGSGLGIFT
IDEETGVIRTQELLDHETTPHYWLTVYAMDGGVVPLSAFVEIYVEVQDVNDNAPQTSEPV
YYPSVAENSPKDVSIIQIEAVDPDARANPQGFFAINSKMKLDREQQDEHILEITVTDHGV
PAKSTTVRVIVKVLDENDNRPQFLEKIYKIKLPEYRVIASDRDEGANSEISYSIEEDEHG
KFFIEPKTGLVSSKFSSAGEYDILTIKAVDNGRPQKSSTCRLHIEWIPKPASAPPLAFEE
PPFFFSVMESDPVAHMVGVITTEGGNYDSRFDVGKASGTLIVARPLDAEQKSNYNLTVAA
TDGTRFVSTQVLIRVDXNNHRPQFSQPRYEVVVAEDTLPETEVXRIGATDEDVRDQDIPV
KRNLVRVIVDVADTNDNAPWFAGSPYSGRVFESAALGSAVLQVTALDKDKGQNAEVIYSI
ESGNVANSFAIDPVLGTVTVAKELDRSSNNQFELAVKATDKGTPSLTATATVHIAVTVSD
NATPRFTAKEFSAEVSELALPGSFVTMITATSQSSVFYQIKGGNTDGAFDVNPNSGVVVT
SRALDYEMTPEYRLTIQGTNMAGLASNTTLLIHLKDENDNAPIFLQPEFTGMISELAPIN
SVVLTRENTPLVIRASDADRDANAMLVYQIVEPFAHNYFAIDSSTGAIRMTTTLDYEQRS
VFRFTIQVHDLGIPRLFAETAANVTVEVIDVNDCSPQFSQELYETSVIVPTYKGVEVIKV
SASDADSKLFFSISEGNEKFKMDSNTGIITIQNVTQLRSRYELRVRVSDGRFANTASIKI
NIRENKESSLKFTRDSYKAYVKENSSEKKTLAVIAAVGNHINEPLFYTILNPDKRFQISR
TSGVLSTTGIPFDREAQDTFDLVVEVTREDASAEVAHVLVTVIVEDVNDNQPMFVNLPYQ
ALVQVDAEEGQAIRQVTAVDGDMGQNAEIHYHLKEHHKHFQISPGEISLKQQLDKDSLNE
FVINVVAKDAGEPALSAEVEVPITIVNKAMPVFEKAFYSIEIPENIQLHTPVVHVQATDS
EGPKIVYTISEGDAFSQFSINFNTGVVHVIQPLDFEAHPAYKLSVRATDSLTGAHADVFV
DIILEDVNDNPPVFQLKSYNANVSEASFIGTAVLQVAATDSDTGNNKMLFYQLVDYFSID
RDLGIIWTARMLDQEEKQQHKLTVRAVDGGVPALSSDVTVTIDVTDLNDNAPVFTERSYK
ATVSELAPRDYFVTHVQASDADSSDLEFSILSGNKDQNFAMDKNTGAIVISNHRKMEPLY
NLNVSVSDGVFRTSAMVKVIVNGANFHNPTFPQLDYVVELTENSPVGTLVAATDKDAGTY
GSLTYHIVNDFAKDKFSVNENGEIFTLEILDRENAIEIPISLMAKDGGGKVGFCIINVIL
TDINDNAPQFRAVEYKANVASDVPRGTTVVKIAASDMDEGSNADIAYEIHPFSGVIVTKE
SLIGLENNLYAFYVRAKDAGSPSKQSVVRVYIRIVAPEVPVPKFAEPHYRFTIAEDMPIG
YSLVKGNTPESNQNEVFVVDRDTGALKLEKSMDHETTKWYQLTLQAQETVAFVNINIQVK
DLNDNKPVFESDPYEAVVVENLPAGTPVIQVKATDQDSGTNGQVIYSLFAVNSETGWVTT
LKELDREKTSKYSIAVLATDRGDKVQLVTSATVKVTVADVNDNPPRFTAEIYKGTVSEDD
PPSGVIAILSTTDADTEEIN
>Ss_XP_014050726
NDLRPLFSPTSYSVSLLENTAIRTSVAKVTATDADIGTNGEYYYSFEWTDMFAVHPTSGV
VTLTGKLDHSETKLYDLEVLAVDRGMKLYGSSGFSSMAKLTVRVEQANEHAPVITAVTLA
PSGADRDPTYAEIASLSVVGGDPLQQFEYKIKAVKDVDWDTQPFGYNLTLQAKDKGTPPQ
FSSAKVVHVTSPKFEHAVYRVNLSEFAPLHTPVAMVTALPKYPQLKYAFRYKTEFAINPD
TGLITTATTKVIIDIIDVNNNAPEFQQTSYKATVDENVPVGSNVLAVKATDLDSGENGYV
TYSIANPQPFVIDYFSGVIGTSEELDYELMPRIYNLKIRASDWGSPFRREVEASVTVTLN
NLNDNKPLFENVDCEVTVPRDHGVGEQITTVSAIDADELQLVRYDIKAGNVLDLFELNSN
SGVLSLKRTLSLQIRASDGEHETEPMIMNITVCVDTGVATMLAEKLLHSVNRYSPQFSFP
SVIEVKEDLPVGARVVHLSASDTDSGFNGKLVYVISGGDAESRFIVDMNTGWLLVHTPLD
RETTDHYTLNVTVYDLGIPQKSSSRLLDVKILDANDNSPQFLQYSVEISENTPVGTEIVQ
VDSTDKDQGDNGVIRYLIVADTDQFAIDELTGVVTVKKPLDREVQPVYILKIAACDQAVN
EPQLVSTVLLKVVLEDVNDNPPKFIPSNYRVKVREDLPIGTVIMWLEAHDPDVGLSSQVR
YSLSDNGDGNFEVDKLSGAVRILQNLDYEKKQVYNLTAKAKDKGKPMSLSSTCFIEVDVV
DVNENLYRPWFPSFVDKGFIKEDALVGTSVMKVTAQDEDKGRDGEIRYSIRDGSGLGIFT
IDEETGVIRTQELLDHETTPQYWLTVYATDGGVVPLSAFVEVYVEVQDVNDNAPQTSEPV
YYPSVAENSPKDVSIIQIEAVDPDARANPQGFFAINSKMKLDREQQDEHILEITVTDHGV
PAKSTTVRVIVKVLDENDNRPQFLEKIYKIKLPEYRVIASDRDEGANSEISYSIEEDEHG
KFFIEPKTGLVSSKFSSAGEYDILTIKAVDNGRPQKLSTCRLHIEWIPKPAGARPLAFEE
PPFFFSVMESDPVAHMVGVITTEGGNYDSRFDVGKASGTLIVARPLDAEQKSNYNLTVEA
TDGTRFVSTQVLIRVDTNNHRPQFSQPRYEVVVAEDTPPETEVLRIGAADEDVRDQDIPV
KRNLVRVIVDVGDTNDNAPWFAGSPYTGRVFESAALGSAVLQVTALDKDKGQNAEIIYSI
ESGNVANSFAIDPVLGTVTVAKELDRSSKNQFELAVKATDKGTPSLTATANVHIAVTVSD
NATPRFTEKEFSAEVSELVLPGSFVTMISATSQSSVFYQIKGGNTDGTFDVNPHSGVVVT
SRALDYESTPEYRLTIQGTNMAGLASNTTLLIHLKDENDNAPIFLQPEFTGMISESAPVN
SVVLTRENTPLVIRASDADRDANAMLVYQIVEPFAHNYFAIDSSTGAIRMTTTLDFEQRS
VFRFTIQVHDLGMPRLFAETAANVTVEVIDVNDCSPQFSQELYETSVIVPTYKGVEVIKV
KASDADSKLFFSISEGNEKFKMDPNTGIITIQNVTQLRSRYELRVRVSDGRFANTASVKI
NIRENKESSLKFTRDSYKAYVKENSSEKKTLAVIASVGNHVNEPLFYTILNPDKRFQISR
TSGVLSTTGIPFDREAQDMFDIVVEVTRKDASSEVAHVLVMVTVEDVNDNQPMFVNLPYQ
ALVQVDAEEGQAIHQVTAVDGDMGQNAEIHYHLKEHHKHFQISPGEISLKKQLDKDSLNE
FVINVVAKDAGEPALSAEVEVPITIVNKAMPVFEKPFYSIEIPENIQLHTPVVHVQATDS
EGPKIVYTISEGDAFSQFSINFNTGVIHVIQPLDFETHPAYKLSVRATDSLTGAHADVFV
DIILEDVNDNPPVFQLKSYNASVSEASFIGTVVLQVAATDPDTGNNKVLFYQLVDYFSID
RDSGIIWTARMLDQEEKQQHKLTVRAVDGGVPALSSDVTVTVDVTDLNDNAPAFTESSYK
ATVSELAPRGHFVTHVQASDADSSDLEFSILSGNKDQNFAMDKNTGAIIISNHRKMEPMY
NLNVSVSDGVFRNSAVVKVTVNGANFHNPTFPQLDYVVELTENSPVGTLVVATDEDAGTY
GRLTYHIVNDFAKDKFSVNEHGEIFTLEILDRENAIEIPISLMAKDGGGKVGFCIINVIL
TDINDNAPQFRAVEYKANVASDVPRGTTVVKIAASDMDEGSNADIAYEIHPFSGVIVTKE
SLIGLENDLYAFYVRAKDAGSPSKQSVVRVYIRIVAPEVPIPKFAEPHYRFTIAEDMPIG
YSLVKGNTPESNHDEVFVVDRDTGALKLEKSMDHETTKWYQLTLQAQETVASVDVNIQVK
DLNDNKPVFESDPYEAVVVENLPDGTPVIQVKATDQDSGTNGQVIYSLFAVNSETGWVTT
LKELDREKTSKYTIAVLATDRGDKVQLVTSTTVEVTVADVNDNPPRFTAEIYKGTVSEDD
PPSGVIAILSTTDADTEEIN
>Ok_XP_020351707
NDLRPLFSPTSYSVSLLENTALRTSVAKVTATDADIGTNGEYYYSFEWTDVFAVHPTSGV
VTLTGKLDHAETQLYDLEILAVDRGMKLYGSSGFSSMAKLTVRVEQANEHAPVIAAVTLA
PSGADRDPTYAEIASLSVVAGDPLQQFEYKIKAVKDVDWDTQPFGYNLTLQAKDKGSPPQ
FSSAKVVHVTSPKFEHAVYRVNLSEFAPLHTPVAMVTALPKYPQLKYAFRYKTEFAINPD
TGLITTAATKVIIDIIDVNNNAPEFQQTSYKATVDENVPVGSNVLAVKATDLDSGENGYV
TYSIANPQPFVIDYFSGVISTSEELDYELMPRIYNLKIRASDWGSPFRREVEASVTVTLN
NLNDNKPLFENVDCEVTVPRDHGVGEQITTVSAIDADELQLVRYDIKTGNDLDLFELNSN
SGVLSLKRTLSLQIRASDGEHETEPMIMNITVCVDTGVATMLAEKLLHTVNRYSPQFSFP
SVIEVKEDLPVGARVVHLSASDTDSGFNGKLVYVISGGDTESRFIVDMNTGWLLVHTPLD
RETTDHYTLNVTVYDLGIPQKSSSRLLDVKILDANDNSPQFLQYSVEISEKTPVGTEIVQ
VDSTDKDQGDNGVIRYSIVADTDQFAIDELTGVVTVKKQLDREVHPVYILKIAACDQAVN
DPQLVSTVLLKVVLEDVNDNPPKFIPSNYRVKVREDLPVGTVIMWLEAHDPDVGLSSQVR
YSLSDNGDGNFEVDKLSGAVRILQTLDYEKKQVYNLTAKAKDKGKPVSLSSTCFIEVDVV
DVNENLYRPWFPSFVDKGFIKEDALIGTSVMKVTAQDEDKGRDGEIRYSIRDGSGLGIFT
IDEETGVIRTQELLDHETTPHYWLTVYGTDGGVVPLSAFVEVYVEVQDVNDNAPQTTEPV
YYPSVAENSPKDVSIIQIEAVDPDARANPQGFFAINSKMKLDREQQDEHILEITVTDHGV
PAKSTTVRVIVKVLDENDNRPQFLEKIYKIKLPEYRVIASDRDEGANSEISYSIEEDEHG
KFFIEPKTGLVSSKFSSAGEYDILTIKAVDNGRPQKSSTCRLHIEWIPKPAGARPLAFEE
PPFFFSVMESDPVAHMVGVITTEGGNYDSRFDVGKASGTLIVARPLDAEQKSNYNLTVEA
TDGTRFVSTRVLIRVDTNNHRPQFSQPRYEVVVAEDTPPETEVLRIGATDEDVRDQDIPV
KRNLVRVIVDVEDTNDNAPWFAGSPYSGRVFESAALGSAVLQVAALDKDKGQNAEIIYSI
ESGNVANSFAIDPVLGTVTVAKELDRSSKNQFELAVKATDKGTPSLTATATIHIAVTMSD
NASPRFTEKEFTAEVSELVLPGSFVTMVSATSQSSVFYQIKGGNTDGTFDVNPNSGVVVT
SRALDYEMTPEYRLTIQGTNMAGLASNTTLLIHLKDENDNAPIFLQPEFTGMISESAPIN
SVVLTRENTPLVIRASDTDRDANAMLVYQIVEPFAHNYFSIDSSTGAIRMTTTLDFEQRS
VFCFTIQVHDLGMPRLFAETAANVTVEVIDVNDCSPQFSQELYETSVIVPTYKGVEVIKV
KASDADSKLFFSISEGNEKFKMDPNTGIITIQNVTQLRSRYELRVRVSDGRFANTASVKI
NIRENKESSLKFTRDSYKAYVKENSSEKKTLAVIASVGNHVNEPLFYTILNPDKRFQISH
TSGVLSTTGIPFDREAQDMFNIVVEVTRMDASSEVAHVLVMVTVEDVNDNQPMFVNLPYQ
ALVQVDAEEGQAIHQVTAVDGDMGQNAEIHYHLKEHHKHFQISPGEISLKKQLDKDSLNE
FVISVVAKDAGEPALSAEVEVPITIVNKAMPVFEKPFYSIEIPENIQLHTPVVHVQATDS
EGPKIVYTISEGDAFSQFSINFNTGVIHVIQPLDFETHPAYKLSVRATDSLTGAHADVFV
DIILEDVNDNPPVFQLKSYNASVSEASFIGTAVLQVAATDPDTGNNKMLFYQLVDYFSVD
RDSGIIWTARMLDQEEKQQHKLTVRAVDGGVPALSSDVTVTVDVTDLNDNAPTFTESSYK
ATVSELAPRGHFVTHVQASDADSSDLEFSILSGNKDQNFAMDKNTGAIVISNHRKMEPLY
NLNVSVSDGVFRNSAMVKVTVNGANFHNPTFPQLDYVVELTENSPVGTLVAATDEDAGTY
GHLTYHIVNNFAKDKFSVNENGEIFTLDILDRENAIEIPISLMAKDGGGKVGFCIINVIL
TDINDNAPQFRAVEYKANVASDVPRGTTVVKIAASDMDEGSNADIAYEIHPFSGVIVTKE
SLIGLENDLYAFYVRAKDAGSPSKQSVVRVYIRIVAPEVPVPKFAEPHYRFTIAEDMPIG
YSLVKGNTPESNRDEVFVVDRDTGALKLEKRMDHETTKWYQLTLQAQETVASVDVNIQVK
DLNDNKPVFESDPYEAVVVENLPDGTPVIQVKATDQDSGTNGQVIYSLFAVNSETGWVTT
LKELDREKTSKYTIAVLATDRGDKVQLVTSTTVEVTVADVNDNPPRFTAEIYKGTVSEDD
PPSGVIAILSTTDADTEEIN
>Om_XP_021474942
NDLRPLFSPTSYSVSLLENTALRTSVAKVTATDADIGTNGEYYYSFEWTDVFAVHPTSGV
VTLTGKLDHAETQLYDLEILAVDRGMKLYGSSGFSSMAKLTVRVEQANEHAPVIAAVTLA
PSGADRDPTYAEIASLSVVAGDPLQQFEYKIKAVKDVDWDTQPFGYNLTLQAKDKGSPPQ
FSSAKVVHVTSPKFEHAVYRVNLSEFAPLHTPVAMVTALPKYPQLKYAFRYKTEFAINPD
TGLITTAATKVIIDIIDVNNNAPEFQQTSYKATVDENVPVGSNVLAVKATDLDSGENGYV
TYSIANPQPFVIDYFSGVIGTSEELDYELMPRIYNLKIRASDWGSPFRREVEASVTVTLN
NLNDNKPLFENVDCEVTVPRDHGVGEQITTVSAIDADELQLVRYDIKTGNDLDLFELNSN
SGVLSLKRTLSLQIRASDGEHETEPMIMNITVCVDTGVATMLAEKLLHTVNRYSPQFSFP
SVIEVKEDLPVGARVVHLSASDTDSGFNGKLVYVISGGDAESRFIVDMNTGWLLVHTPLD
RETTDHYTLNVTVYDLGIPQKSSSRLLDVKILDANDNSPQFLQYSVEISEKTPVGTEIVQ
VDSTDKDQGDNGVIRYSIVADTDQFAIDELTGVVTVKKQLDREVHPVYILKIAACDQAVN
DPQLVSTVLLKVVLEDVNDNPPKFIPSNYRVKVREDLPVGTVIMWLEAHDPDVGLSSQVR
YSLSDNGDGNFEVDKLSGAVRILQTLDYEKKQVYNLTAKAKDKGKPVSLSSTCFIEVDVV
DVNENLYRPWFPSFVDKGFIKEDALIGTSVMKVTAQDEDKGRDREIRYSIRDGSGLGIFT
IDEETGVIRTQELLDHETTPHYWLTVYGTDGGVVPLSAFVEVYVEVQDVNDNAPQTTEPV
YYPSVAENSPKDVSIIQIEAVDPDARANPQGFFAINSKMKLDREQQDEHILEITVTDHGV
PAKSTTVRVIVKVLDENDNRPQFLEKIYKIKLPEYRVIASDRDEGANSEISYSIEEDEHG
KFFIEPKTGLVSSKFSSAGEYDILTIKAVDNGRPQKSSTCRLHIEWIPKPASARPLAFEE
PPFFFSVMESDPVAHMVGVITTEGGNYDSRFDVGKASGTLIVARPLDAEQKSNYNLTVEA
TDGTRFVSTRVLIRVDTNNHRPQFSQPRYEVVVAEDTPPETEVLRIGATDEDVRDQDIPV
KRNLVRVIVDVEDTNDNAPWFAGSPYSGRVFESAALGSAVLQVAALDKDKGQNAEIIYSI
ESGNVANSFAIDPVLGTVTVAKELDRSSKNQFELAVKATDKGTPSLTATATVHIAVTMSD
NASPRFTEKEFTAEVSELVLPGSFVTMISATSQSSVFYQIKGGNTDGTFDVNPNSGVVVT
SRALDYEMTPEYRLTIQGTNMAGLASNTTLLIHLKDENDNAPIFLQPEFTGMISESAPIN
SVVLTRENTPLVIRASDTDRDANAMLVYQIVEPFAHNYFAIDSSTGAIRMTTTLDFEQRS
VFCFTIQVHDLGMPRLFAETAANVTVEVIDVNDCSPQFSQELYETSVIVPTYKGVEVIKV
KASDADSKLFFSISEGNEKFKMDPNTGIITIQNVTQLRSRYELRVRVSDGRFANTASVKI
NIRENKESSLKFTRDSYKAYVKENSSEKKTLAIIASVGNHVNEPLFYTILNPDKRFQISR
TSGVLSTTGIPFDREAQDMFNIVVEVTRKDASSEVAHVLVMVTVEDVNDNQPMFVNLPYQ
ALVQVDAEEGQAIHQVTAVDGDMGQNAEIHYHLKEHDKHFQISPGEISLKKQLDKDSLNE
FVISVVAKDAGEPALSAEVEVPITIVNKAMPVFEKPFYSIEIPENIQLHTPVVHVQATDS
EGPKIVYTISEGDAFSQFSINFNTGVIHVIQPLDFETHPAYKLSVRATDSLTGAHADVFV
DIILEDVNDNPPVFQLKSYNASVSEASFIGTAVLQVAATDPDTGNNKVLFYQLVDYFSVD
RDSGIIWTARMLDQEEKQQHKLTVRAVDGGVPALSSDVTVTVDVTDLNDNAPTFTESSYK
ATVSELAPRGHFVTHVQASDADSSDLEFSILSGNKDQNFAMDKNTGAIVISNHRKMEPLY
NLNVSVSDGVFRNSAMVKVTVNGANFHNPTFPQLDYVVELTENSPVGTLVAATDEDAGTY
GRLTYHIVNNFAKDKFSVNENGEIFTLDILDRENAIEIPISLMAKDGGGKVGFCIINVIL
TDINDNAPQFRAVEYKANVASDVPRGTTVVKIAASDMDEGSNADIAYEIHPFSGVIVTKE
SLIGLENDLYAFYVRAKDAGSPSKQSVVRVYIRIVAPEVPIPKFAEPHYRFTIAEDMPIG
YSLVKGNTPESNRDEVFVVDRDTGSLKLEKRMDHETTKWYQLTLQAQETVASVDVNIQVK
DLNDNKPVFESDPYEAVVVENLPDGTPVIQVKATDQDSGTNGQVIYSLFAVNSETGWVTT
LKELDREKTSKYTIAVLATDRGDKVQLVTSTTVEVTVADVNDNPPRFTAEIYKGTVSEDD
PPSGVIAILSTTDADTEDIN
>Lo_Holostei_FAT1_ENSLOCG00000013845_MTNR1A_absentfromspecies_LG4
NDLRPLFSPTSYSVSLPENTALRTSISRVMATDADIGTNGEYYFSFDRTDMFAIHPTSGV
VTLTGKLDYSEARLYEMEILAVDRGMKLYGSSGVSSMARLTVRVEQANEHAPVITAVALA
PSGSDRDPTYAEIASLSIVAGDPLQQFEYKIKAVREVDWESRPFGYNLTLQAKDKGSPPQ
FSSVKVVHLASPTFERAIYRVNLSEFAPVHTPVVMVTAVPEHPQLRYALKTNVHFAINPN
TGLITTAATKVVIDVLDMNNNAPEFLQTSYKASVDEHVPVGTSVLRVRATDLDSGENGYV
TYSIANPRPFAIDYFTGVISTSEDLDYELMPRVYNLKIRASDWGFPYRREAEVPVTITLN
NLNDNKPLFENVDCEVTVPRDLGVGEQITTLSAIDADELQLVRYEIKAGNDLDLFELNPN
SGVLSLKQSLSLHITANDGENMTPPMIMNITMCVDTGVAKMLAEKLLHSVNRFAPQFTFP
NVIEAKEDLPVGARILHISATDADTGFNGKLVYAISGGDSDSRFIIEMETGWLMVYAPLD
RETANHYTLNVTVYDLGIPQKSSWRLLDVTILDSNDNSPRFLQYSVEISENTEVGSDIIQ
VEATDRDLGLNGEVRYSLVGDTDKFEINEQTGIVKVKGHLDREARSVYLLKIAARDQAAE
EPQLLSTVLLKVTLEDVNDNPPRFVPSNYRVKVREDLPVGTVIMWLEAHDPDLGQASQVR
YSLIDSGDGNFDVDKLSGAVRIVQNLDYEKRQFYNLTARAKDKGKPVSLSSTCYVEVEIV
DVNENLHRPSFSSFVDKGSVKEDAPVGTSVMQVTARDDDKGRDGTVRYSIRDGSGIGIFK
IDEETGIIRTEELLDHETTSRYWLTVYATDQGVVPLSSFIEVYIEVQDVNDNAPQTAKPV
YYPSVMENSLKDVSIIQIEAFDPDSNSNPQGFFTINPKTKLDREQQAEHILEVTILDNGI
PPKSAVVRVVVKVLDENDNKPQFLEKIYKIKLPEYRVIAADKDEGPNAEISYSIEEDEQG
KFFIEPKTGLVSSKFSSAGDYDILTIKAVDNGRPQKSSTCRLHVEWISKPPSADPLAFDE
PFFSFSVMESDPIAHMVGVITYEGGNYDSRFDVGKGSGTIIVARPLDAEQKSNYNLTVEA
TDGTKSISTQVFIRVDTNNHRPEFSQPKYEVSISEDTVPDTEILQISATDKDVRDQDVPV
KRNLVRVIIDVEDANDHAPWFTSSPYKGRVYESAAVGSAVLQVTALDRDQGENAEIVYSI
ESGNVANSFAIDPLLGTITVAKELDQSSKDQFELTVKATDKGHPPLSVVTPVHISVTISD
NAKPRFAKKEFSAEVSESALVGSFVGLVSASSQSSVFYEIKDGNFDGVFDINPNSGIVIT
QKTLDYETVPSYRLTVQGTNMAGLSNNATLLIHLRDENDNAPVFTQAEFLGMISEAAPVN
SVVLTRENSPLVIRAIDADRETNAMLVYQIVEPSAHSYFAIDSSTGAIRLVTTLDYEQNS
IFHFTVQVHDMGAPYLFAETAANVTIQVVDVNDCSPLFSKEMYETSVLLPTYKGVKVIAL
NATDADSKMIFSISDGNEKFKIDSNVGVISIQNTSHLRSRYELTVRVSDGKFASTASVKI
NVRENKESGFKFTQSSYTASVQENSLEPKSIAVIASVGHQINEPLFYTILNPDRRFKIGR
TSGVLSTTGIPFDREEQDVYEIVVEVTKEQRSAGLAHMLVKVTVEDENDNKPKFVNLPYY
ALVQVDAEAGHVIRQVTAVDEDIGRNGEVHYHLKEHHEYFQISPGEITLKKPFEQESLAE
YVIAVVAKDGGEPALSAVVEVPITIVNKAMPVFEKPFYNIEIPENIQRHSPVAHVQASSL
EGPRIVYSITEGDPFRQFSINFNTGVIHVIAPLDFETHPAYKLNVRATDSLTGAHSEVFV
DVILEDVNDNPPAFKEKSYNVRLSEASVIGTSVLQVFATDSDSGSNKVVSYQLLDYFSID
RESGVIVTARMLDHEKRAQHNLLVRAVDGGVPALTSDVPVTVHITDLNDNPPVFTQQLYE
ATVSQLASRGHFVTHVQASDADSSDLEYAILAGNENQNFDIDRKSGVIAISNHRKMEASY
NLNVSVSDGVFRSSAQVRVTVIGANFHSPSFNQIDYVVELSENSPVGTLVAATDEDSGTY
GHITYYIVNDFARDKFSVNEDGQIFTLESLDRENTAEIAISLMAKDGGGKVGFCTVNVIL
TDVNDNAPQFRAAEYRVNVASDVPRGTTVVKIAASDADEGSNADIAYEIHPFSGIIVTKE
SLIGLENDLYAFYVRAKDAGNPPRESIIPVYIRILAPEEPVPKFVEPHYRFAISENLAVG
YSLAKGNTPESNQGEIFVIDRDSGRLKLEKNLDHETTKWYQLTLLAQEVVSTVEINIQVK
DVNDNSPQFESNPYKAFVVENSPGGTQVIQVRANDVDSGTNGQVMYSLFAINSETGWITT
LKELDHEKQSKYSVTVVASDRGEKVQLTASTKVEVTVADVNDNPPRFTAEIYKGTVSEDD
PPSGVIAILSTTDADSEEIN
>Cm_chondrichthyes_FAT1_SINCAMP00000019650_MTNR1A
NDLRPLFSPTSYSVSLPENTPLRTSVARVRATDADIGTNGEFYYSFDRTDVFAIHPTSGI
IMLTGRLDYTETRYYDMEILAADRGKKLYGSSGISSMAKLSVHVEQGNENTPVITAVTVT
PSDTDKDPTYAEIASLNIVAGDPLHQFEYRIKAGDQVDWESQSSGYNLTLQAKDKGSPPQ
FSSVKVIHVTSPKFEKPVYKARLSEFAPPNSPVVKITAVPMYPHVKYTFSHQPDFRINRN
TGLITTAATKVIVDVIDMNDNAPEFTQSSYQGSINENVPVGTTVLSVSATDMDNGENGYV
SYSIANPPPFVIDYFTGVISTSEELDYELMPRVYNLRVRASDWGSPYRREVEAFVTIVLN
NLNDNKPLFEKVNCVGTLPRDLGVGEQITTVSAIDADELQLVRYQILSGNDLDLFELNPN
SGVLVLSQPFSLQIIATDGENFATVTYINITVCTETGVAKQLAEKLLHSVNRHGPVFSFP
SAIEVREDKPVGMNLLFINATDLDSGFNGKLVYVISGGDSDSKFIVDLETGWLKVFAQLD
REATDHYTLNITVYDLGIPQRSTWRLLDVVILDANDNHPEFFQYSVEVSENKEVESEIIQ
LEATDRDLGANGEVRYSILTDTDMFAIDSVTGTVKVVGLLDREQIPVYLLKIEARDQAEQ
EPQLFSTVLLKVTLEDVNDNPPQFFPPNYHVKVREDLPIGTVVMWLEAYDPDLGQSGQVR
YTMIDNGEGNFDVDKLSGILRIVNNLDFEKKQFYNLTARAKDKGRPVSLSSTCYIQVEVV
DVNENLFAPVFPYFVANGSVREDASLGTLVMTITAHDDDKGRDGEVRYSIRDGSGLGVFK
IDEEKGTIKTTELLDRETTSHYWLTVYATDLGVVPLFSFIEVYIKIEDVNDNAPQTSEPV
YYPEVMENAPKDTSVVQIEAFDPDSSSNPQGFFTMNQKTKLDREQQAEHILEITITDNGK
SPKSTIARVIVKVLDENDNKPQFLQKFYKIKLPEFRVIAADKDEGANAEISYSIEEDEQG
KFFIEPKTGVVSSKFCAAGEYDILSIKAVDNGRPQKLSTTRLHIEWITRPPSSVPLVFEE
SLFSFSVMESDPVTHMVGVIAVEGGNYDSRFDVDKGSGTIIVARPLDAEQKSYYNMTVEA
TDGTKTISTQVHIKVDTNDHRPAFLKPKYEVNVPEDAMPNTKILQVSATDKDVRDQDVPV
KRNYLRVVVHVEDTNDHAPWFTSSSYNGRVYESAAIGSAVLQVTALDKDKGENAEIIYTI
ESGNIGNGFAIDPVLGTITVTKVLDRSIRRQYELIVKATDGGKLPMSAITIVRIYVTISD
NAAPKFLLKEYSTDISEGARIGSFVILVTASSQSSIVYEIKDGNTDGAFDINPNSGVIVT
QKALDIEQLASYTLTIQATNMAGLSANMIVLIHLRDENDNMPVFTQSEYTGIISESAHIN
SMVLNDRNTPLVIQAIDADEGSNALLVYQIVEPSAQKYFAIDSSTGAIRAVTQLDYEQSS
IFHFTVQAYDRGSPQLFAEHAANVTIHVIDANDCPPVFVQDLYEVSLLIPTYKGVKVVVL
NATDADSELIYSIIDGNEKFMLDAQTALVSVKNTTQLRSRYELLVRVSDGQFTSKASVRI
NIKESKESHLKFTQSSYSAVVKESSTDIKTIAIITAVGNEMNEPLFYNILNPDTKFKISR
TSGVLATTGIPFDREEQEAYDVVVEVSEEKNPSRVAHVVVKVTVEDDNDNAPIFVNLPYY
AVVQVDAEKGHVIRKVTAIDKDIGNNGEVHYYLKEHHEHFQIGPGDISLKKNLDADLSNE
HMITVVAKDGGKVPLSAEVEVPITVINKAMPIFEKPFYSIEIPENIQLHTPVVHVQANSP
EGLRVIYSIMDGDPFSQFTINFNTGVINVISSLDFEMHPAYKLTVRATDSLTGSHSEVFV
DIVVEDVNDNAPVFVEKTYTSTLSEASVVGTSVVQVTATDIDSGMNRVIYYQLVDYFHID
GSSGLILTARVLDYEQIERYNLLVRALDSGKPALSSDIVVIVHITDLNDNPPLFSQLLYM
ASVSELAARGHFVTHVQASDADASDLRYSIVSGNDHMNFAIDSKSGIVTWTNLHRLEPSY
SLNVSVSDSVFRSSAEVRITIISANFHKPVFPQSEYEVELAENSNLRTLVIATDEDSGMY
GNIAYSIVNDFAKAKFFVDQKGQIFTTEKLDRENPVEITITVMAKDGGGKVAFCNINVIL
TDENDNIPQFRAVEYKVNIGSYASKGSSVIQIVASDADEGSNADIVYEIDSFSGVINTKE
SLVGLENNFYSFFVRAKDGGVPQQESVVPVYVRILPPEVPVPKFSESLFTYTISEDIRIG
YSLVKGNTLESNKDEIFTIEKDTGKLKTEKNLDHETTKWYQIMVMAQEVVTSVDVSIQVK
DVNDNKPIFDSEPYKAFIVENLPEGTTVIQVKATDLDSGTNGLVTYSLFTINSETGWITS
LKELDHEKINKYNVVVVASDRGEKVQLSSSVVVEVTVTDVNDNPPRFTAEIYKGTVSEDD
PPGGVIAILSTVDADTEEVN
>Ps_reptilia_FAT1_ENSPSIG00000006082_MTNR1A_
NDLRPLFSPTSYSVSLPENTAIRTSIARVSATDADIGTNGEFYYSFERTDMFAIHPTSGA
VVLTGRLDYAETKLYEMEILAVDRGMKLYGSSGISSMARLTVHVEQANEYAPVITAAVLT
PSELDKDPTYAEIASLSIVAGDLLQQFEYKIKAVGHVDWENQPFGYNLTLQAKDKGNPSL
FSSVKVIHITSPRFEKDVYRADISEFAPPNTPVIMVKALPNYSQLKYIFKNAPGFNLNPH
TGLITTASAKVIIKVKAMNSNPPEFTQTSYKASFDENVPVGTNVMSVSAKDLDEGENGYV
TYSISNPLPFMINHFNGSISTTEDMDYELMPRVYNLRIRASDWGTPYRREVEVPVTIILN
NLNDNTPLFEKINCEGTIPRDHGVGEQITTVSAIDADELQLVRYQIESGNDLDLFILNPN
SGVLSLKQSLSLRITATDGENFAVPLYINITVCEETGVAKMLAEKLLHSMNLHAPQFTLA
TSVEVKEDLPVGSSIILMGATDLDVGFNGRLVYAISGGNNDSSFTVDLETGTLKILSPLD
REVKDKYTLNITVYDLGIPQKSAWHLLDIKILDANDNRPEFLQYFVEVSENKELNSEIIQ
IEATDKDLGTNGEVKYSLITDTDLFTIDSETGIVKVVGALDREIQQVHFLKIEARDQPNE
EPQLFSTVLLKVSLEDVNDNPPKFIPLNYHVKVREDLPEGTIITWLEAYDPDIGQSSQVR
YSFLDSGDGTFDVDKLSGAIRIVQKLDFERRQVYNLTVRAKDKGKPISLSSTCYVEVEVV
DVNENLHPPRFSSFVDKGFVKEDVPIGSSVMTVTAYDEDTGRDGEIRYSIRDGSGVGIFR
IDEEKGVIETADWLDRETTSHYWLTVYATDHGVVPLSSFIDIYIEVGDVNDNAPQTTEPV
YYPEVIENSPKDVSVIQIEAFDPDSSSNPQGFFSINLKTKLDREQQCEHILEVTITDNGI
PAKSTITRVVVKILDENDNKPQFLQKFYKIRLPEYRVIAADKDEGPNAEISYSIEDDEHG
KFFIEPKTGVVSSKFSGAGEYDILTIKAVDNGRPQRSSTARLHIEWISKPPSIDPISFEE
TFFSFTVMESDPVAHMIGVIAVEGGNYDSRFDVDKGTGTIIVARPLDAEQKSNYNLTIEA
TDGTRCVSTQVYIKVDTNNHRPQFSTSKYEVIIPEDTVPETEILQVSATDRDVRDQDVPV
KRNFARIVINVSDTNDHAPWFTSSSYEGRVYESAAVGSAVLQVTALDKDKGKNAEIVYSI
ESGNIGNSFTVDSILGTIRIAKELDCNNQREYNLMVRATDKGDPPMSEVTSVLIFVTISD
NASPKFTRKEYSTEVTEGASIGSFVGMVTAYSQSSVVYQIKDGNVGDAFDINPNSGVITS
RKILDFETLPFYTLTVQGTNMAGLSTNTTILVHLRDENDNSPVFMQAEYTGLISESASIN
SVVLTDKNIPLVIRATDADKESNSVLVYQIVEPSVHKYFAIDSSTGAIRTVMSLDYEETN
IFQFSVQVHDMGTPRLFAEYAANVTIYVIDINDCPPVFSKDLFEASLLVPTYKRVQVITV
NATDADSQLIYSITEGNDKFSIDPKTGTITVQNTTQLRSRYELTVRVSDGRFASTASVKI
NVKESKASPLKFTQSSYSVVVRENSTKAERIDVITVVGNQMNEPLFYRILNPDSRFKISS
TSGVLSTTGIPFDREQQESFDIVVEVTKEHKPSAVAHVVVKVTIEDINDNAPVFVNLPYY
AAVKVDTEVGHIIRRVTAVDRDVGSNGEVRYHLKDHHEHFQIGPGEISLKRQFEPDTLNE
YLVTVVAKDGGEPSFSAEVTVPITVMNKAMPVFEKPFYSAEIPENIQLHSPVVHVQANSP
EGLKVFYSITDGDPFNQFTINFNTGVIIVVATLDFESHPAYKLSIRATDSLTGAHAEVFV
DIIVEDINDNPPLFTKPSYTVILSEASVIGTSVVQVSATDADSGTNRRLSYHLVEYFHMD
SSSGLILTARTLDYEQTQQHKLLIRAVDGGMPPLSSDLIVTVSITDLNDNPPLFNQLLYE
AKISELAPRGHFVTCVKASDADSSDLEYSILTGNDHMNFVINSKTGIISISNLRKLKSLY
NLNVSVSDGVFRSSAQVQITVMGANLHSPVFSQNEYEVELAENAPLHTLVTVTDEDSGSN
GQITYHIVNDFAKDRFYTNERGQIFTSENLDRETQTEISISLMAKDAGGKVAFCNVNVIL
TDDNDNAPQFRATEYEVNIGSNVPRGTFITKVLASDADEGTNADITYEIDPLSGVITTKE
SLIGLENEFLTFFVKARDGGSPPKQSVVPVYIRILPPEVTLPKFAEPFYSYAVSEDIPIG
YTLIKGNTLESNRDECFVIDRQNGRLKLEKNLDHETTKWYQFTVLAKNVVSSVDVSIQIK
DANDNKPVLESNPYKAFIVENMPSGTRVIQVKATDLDSGLNGQVTYSLFAINMETGWITT
LKELDHEKRDKYTITVVASDRGEKIQLSSMTVVEVTVTDVNDNPPRFTAEIYKGTVSEDD
PPGGVVAILSTTDADTEDSN
>Hs_mammal_FAT1_ENSG00000083857_MTNR1A_chr4
NDLRPLFSPTSYSVSLPENTAIRTSIARVSATDADIGTNGEFYYSFDRTDMFAIHPTSGV
IVLTGRLDYLETKLYEMEILAADRGMKLYGSSGISSMAKLTVHIEQANECAPVITAVTLS
PSELDRDPAYADIASLSIVAGDLLQQFEYKVKAIGGIDWDSHPFGYNLTLQAKDKGTPPQ
FSSVKVIHVTSPKFEKDVYRAEISEFAPPNTPVVMVKAIPAYSHLRYVFKSTPGFSLNYN
TGLISIASTKVLVKVLGANSNPPEFTQTAYKAAFDENVPIGTTVMSLSAVDPDEGENGYV
TYSIANHVPFAIDHFTGAVSTSENLDYELMPRVYTLRIRASDWGLPYRREVEVLATITLN
NLNDNTPLFEKINCEGTIPRDLGVGEQITTVSAIDADELQLVQYQIEAGNELDFFSLNPN
SGVLSLKRSLSLRITATDGENFATPLYINITVCEETGVAKMLAEKLLHSVNAHIPQFTLP
TGIQVKENQPVGSSVIFMNSTDLDTGFNGKLVYAVSGGNEDSCFMIDMETGMLKILSPLD
RETTDKYTLNITVYDLGIPQKAAWRLLHVVVVDANDNPPEFLQYFVEVSEDKEVHSEIIQ
VEATDKDLGPNGHVTYSIVTDTDTFSIDSVTGVVNIARPLDRELQHEHSLKIEARDQARE
EPQLFSTVVVKVSLEDVNDNPPTFIPPNYRVKVREDLPEGTVIMWLEAHDPDLGQSGQVR
YSLLDHGEGNFDVDKLSGAVRIVQQLDFEKKQVYNLTVRAKDKGKPVSLSSTCYVEVEVV
DVNENLHPPVFSSFVEKGTVKEDAPVGSLVMTVSAHDEDARRDGEIRYSIRDGSGVGVFK
IGEETGVIETSDRLDRESTSHYWLTVFATDQGVVPLSSFIEIYIEVEDVNDNAPQTSEPV
YYPEIMENSPKDVSVVQIEAFDPDSSSNPQGFFSIHPKTKLDREQQDEHILEVTVTDNGS
PPKSTIARVIVKILDENDNKPQFLQKFYKIRLPEYHVIATDKDEGPNAEISYSIEDNEHG
KFFIEPKTGVVSSRFSAAGEYDILSIKAVDNGRPQKSSTTRLHIEWISKPPSLEPISFEE
SFFTFTVMESDPVAHMIGVISVEGGNYDSHFDVDKGTGTIIVAKPLDAEQKSNYNLTVEA
TDGTTTILTQVFIKVDTNDHRPQFSTSKYEVVIPEDTAPETEILQISAVDQDVRDQDVPV
KRNFARIVVNVSDTNDHAPWFTASSYKGRVYESAAVGSVVLQVTALDKDKGKNAEVLYSI
ESGNIGNSFMIDPVLGSIKTAKELDRSNQAEYDLMVKATDKGSPPMSEITSVRIFVTIAD
NASPKFTSKEYSVELSETVSIGSFVGMVTAHSQSSVVYEIKDGNTGDAFDINPHSGTIIT
QKALDFETLPIYTLIIQGTNMAGLSTNTTVLVHLQDENDNAPVFMQAEYTGLISESASIN
SVVLTDRNVPLVIRAADADKDSNALLVYHIVEPSVHTYFAIDSSTGAIHTVLSLDYEETS
IFHFTVQVHDMGTPRLFAEYAANVTVHVIDINDCPPVFAKPLYEASLLLPTYKGVKVITV
NATDADSQLIYSITEGNEKFSMDYKTGALTVQNTTQLRSRYELTVRASDGRFAGLTSVKI
NVKESKESHLKFTQDVYSAVVKENSTEAETLAVITAIGNPINEPLFYHILNPDRRFKISR
TSGVLSTTGTPFDREQQEAFDVVVEVTEEHKPSAVAHVVVKVIVEDQNDNAPVFVNLPYY
AVVKVDTEVGHVIRYVTAVDRDSGRNGEVHYYLKEHHEHFQIGPGEISLKKQFELDTLNE
YLVTVVAKDGGNPAFSAEVIVPITVMNKAMPVFEKPFYSAEIAESIQVHSPVVHVQANSP
EGLKVFYSITDGDPFSQFTINFNTGVINVIAPLDFEAHPAYKLSIRATDSLTGAHAEVFV
DIIVDDINDNPPVFAQQSYAVTLSEASVIGTSVVQVRATDSDSEPNRGISYQMFDHFHVD
SSTGLISLLRTLDYEQSRQHTIFVRAVDGGMPTLSSDVIVTVDVTDLNDNPPLFEQQIYE
ARISEHAPHGHFVTCVKAYDADSSDLQYSILSGNDHKHFVIDSATGIITLSNLHRLKPFY
SLNLSVSDGVFRSSTQVHVTVIGGNLHSPAFLQNEYEVELAENAPLHTLVMTTDGDSGIY
GHVTYHIVNDFAKDRFYINERGQIFTLEKLDRETPAEISVRLMAKDAGGKVAFCTVNVIL
TDDNDNAPQFRATKYEVNIGSSAAKGTSVVKVLASDADEGSNADITYEINKLSGVITTKE
SLIGLENEFFTFFVRAVDNGSPSKESVVLVYVKILPPEMQLPKFSEPFYTFTVSEDVPIG
YSLVKGNTPESNRDESFVIDRQSGRLKLEKSLDHETTKWYQFSILAREMVASVDVSIQVK
DANDNSPVFESSPYEAFIVENLPGGSRVIQIRASDADSGTNGQVMYSLFAINMETGWITT
LKELDHEKRDNYQIKVVASDHGEKIQLSSTAIVDVTVTDVNDSPPRFTAEIYKGTVSEDD
PQGGVIAILSTTDADSEEIN
>Ss_XP_014068291
NDLRPLFSPTSYTVSVPENAAIRTSIVRVTATDADVGSNAEYYFRLEHTDMFAIHPTSGV
ITLMARLDYAERRLFEMDVLAVDRGMKLYGSSGFSSTAKLTVRVLQANEHAPVLTAVPLA
PSATDTDPTYAEIASLSIVAGDPLQQFEYRVKAIKDVDWDSCQFGCNLTLQAEDKGSPPQ
FSLAEVIRVQSPTFEKNIYRVNLTEFAPPNTFVVMVRAMPNHPMLKYSIKYPKIFTINSN
TGLITTASTRVVINVIDVNNNAPVFQQPSYKGNVNENVPVGTSILTVSASDMDEGENGYV
TYTIANPQPFTIDYFTGVISTARELDYERMPRVYNLRVRASDWGSPFCREVETPVSITLN
NLNDNEPLFEKVDCEVSLPRDYRVGGQIAAVSAIDADNMEGVQHVVIDGNSLGLFDLTPD
TGLLSLKLPLSLQISANDGETSSKPMFVNITVCVDTGVVGRMAEKLLHSINNYSPHFSTP
KVIEVKEDLQVGMRIAHLSAIDADSGFSGTLMFVISGGDVESRFMIEMDTGWLKIMEPLD
REITDQYTLNITVYDLGIPQRSVSHVLQINVLDSNDNSPNFLQYTVSIREDTDVGTAVIQ
VDATDKDSGANRIIRYSLMAESDHFVIDDQTGVVKVKSPLDRELHPTIILKVVACDQAVD
ELQMISTVSLKIVLEDVNDNPPRFFPLLQRVKVREDLPLGAVVVWLQAHDPDQGQSGQVR
FSLLDNGDGDFDVDKTNGAVRILRTLDFERRQVYNLTARAKDKGKPESLSCTCFIEVYVV
DVDENLHQPRFASFVDKGSVREDAPIGTTIMTVTAQDNDQGRDGEIRYSIRDGSGLGVFT
IDEESGVIQTQELLDHETTNRYWLTIYGTDLAVVPKSSFMEVYIEVEDVNDNAPQTSEPV
YYPEVMENSPKDVSVIQVEAVDPDSGNNPQGFFSIDHQTKLDREQQEEHTLEITVTDKGV
PARSTAVRVVVRVQDENDNTPQFLEEIYKVQLPEYRVIASDRDTGPNAEVSYSIEGDEQG
RFFIEPQTGHVFSEIVLAGQHAILTIKVVDNGRPQRSSTCRLHIEWIVRPPSSEPLVFEE
TSLAFSVMETDPVAHMVGVISTQGGNADSRFDIGKGSGTVILAKPLHAEPKSNYSLTVEA
TDGNRYISTQVFIKVDTNNHRPQFSQPQYEVSIPEDTAPESGILQLSATDRDVCDDCVPL
KCNLVRVIVNVEDTNDNTPWFTSPRYSGQVFESAAVGSAVLQVTAQDRDRGSNAEISYII
ESGNEDNMFAIDLVLGTITVAKELDRDDKSQFELAVKASDRGAPPLSAVTAVRIAVTVPD
NTRPRFPEEEISAVISETAPVGSLVTLVSASSHSSVLYQIREGNVNNAFDINPTSGVVVT
QRLLDYESVSSYRLTVQATNMAEMVNYVTVLIHLKDENDNSPVFTQTEFRGVVSESAPVN
SMVLTNGKSPLVIQATDADSDLNGRLVYQIVEPYALDYFAIDSSTGAIRTVTGLDYEQRS
EFNFTVQVHDSGKPQLFSETIAYVTIHITDVNDCPPTFSQDVFETSVIVPTYSGVKVISI
NATDLDSKLLFSISDGNGQFMIDPKSGVISVLNPAQLRNGYELTVRVSDGKFTKTAMVKI
NIRENQNKDLAFAKDLYTVSLPENSSERKTLAVVTAARKRLNEPLFYTILNPQGRFEIGH
TSGVLFTTGVPFDREEQDTFEIVVEVTKEHRSSGVAHALVVVTIEDVNDNEPVFVGLPYS
ALVQLDSAVGQVVRQITTVDKDIGRNAEIKYQLKEDWGYFQISPGEISLKRTIHPEDVDK
FAISVIGKDRGDPSLSATVEVAVTVVNKAVPVFEKSSYDIVIPEDVPLDTSFVKIQANAS
EGPRTVYSISKGDPLGQFSISFITGVIHVVQPLDYETHPAYRLSIRASDSLTGAHSEVFL
DIILEDVNDNAPTFKERLYEASVSELADIDSSVLQVSATDSDSGNNKVLFYQLVDYFTID
QDSGVIITSGLLDFEVGPQHRLVVRAVDGGVPAQSSEVPVIISVTDINDNPPVFTQHLYK
AMVSQLAQRGHFVACVRTSDADLSDLEYSLLSGNEDSSFTIDGRSGEIVISKYRKRETLY
NLSVSVSDGLYSSVCNVQVTVVTSNLHSPSFSHTDSVVELLENSPVGTLVTATDKDLGVY
GKVTYYIVNDVAKDRFTINENGEIFTVESLDRENVISISISLMAKDGGGKLGFTSVNVIL
TDVNDNAPQFRAAEYNANIPRDVSEGTVIVRVTAVDADEGSNADITYDIHPLNGDIIAKN
KFTAYTNDLFSFYVSAKDAGDPPKKTLVPVYIRLLPKEVTVPKLVELQKRWSVSEGLPIG
YNLVKGSTPESNQDQVFVVNTDTGKLKLAKRLDFETTKWYLLTLQAQDVITTAQLHIQVQ
DVNDNSPQFESDSYRSFVVENLPKGTSVIQVRATDLDSGVNGQVTYSLFAVDGESGWVTT
LKELDRERHDQYSVAVLATDRGHDGRLNTAATVEVTVVDVNDNPMRFTAEVFRASVSEDI
VPSRAIAVLRTTDRDSEDLN
>Ok_XP_020357675
NDLRPLFSPTSYTVSVPEHADIRTSIVRVTATDADVGSNAEYYFSLEHTHMFAIHPTSGV
ITLMARLDYAERRLFEMDVLAVDRGMKLYGSSGFSSTAKLTVRVLQANDHAPVLTAVPLA
PSATDTDPTYAEIASLSIVAGDPLQQFEYRVKAIKDVDWDSCQFGCNLTLQAEDKGSPPQ
FSSAEVIRVRSPTFEKNIYRVNLTEFSPPNTSVVMVRAMPNHPMLKYSIKYPKIFTINSN
TGLITTASTRVVINVIDVNNNAPVFQQPSYRGNVNENVPVGTSILTVSASDMDEGENGYV
TYTIANPQPFTIDYFTGVISTARELDYEKMPRVYNLRVRASDWGSPFRREVETPVSITLN
NLNDNEPLFEKVDCEVSLPRYYRVGEQIVAVSAIDADDMEGVQHVVIDGNSLGLFDLTPD
TGLLSLKLPLSLQISANDGETSSKPMFVNITVCVDTGVVGRMAEMLLHSINNYFPRFSTP
KVIEVKEDLQVGTRIAHLSAIDADHGFSGTLMFVISGGDVESRFMIEMDTGWLKIMEPLD
REIMDQYTLNITVYDLGTPQRSASHVLQINVLDSNDNSPNFLQYSVSIREDTDVGTAVIQ
VDATDKDLGANRIIRYSLMAESDHFVIDDQTGVVKVKSPLDRELHPTIILKVVACDQAVD
EPQMVSTVSLKIVLEDVNDNPPRFFPLHQRVKVQEDLPLGAVVVWLQAHDPDQGQSGQVR
FSLLDNGDGDFDVDKTNGAVRILRTLDFERRQVYNLTARAKDKGKPESLSCTCFIEVYVV
DVDENLHQPRFASFVDKGSVREDAPIGTTIMTVTAQDNDQGRAGEIRYSIRDGSGLGVFT
IDEESGVIQTQELLDHETTNHYWLTIYGTDLAVVPQSSFMEVYIEVEDVNDNAPQTSEPV
YYPEVMENSPKDVSVIQVEAVDPDSGNNPQGFFSIDHQTKLDREQQEEHALEITVTDKGV
PARSTAVRVVVRVQDENDNSPQFLEKIYKVQLPEYRVIASDRDTGPNAEVSYSIEEDEQG
RFFIEPQTGHVFSEVVSAGQHAILTIKVVDNGRPXRSSTCRLHIEWIVRPPXLEPLVFEE
TSLVFSVMETDPVAHMVGVISTQGGNADSRFDVGKGSGTVILAKPLHAEPKSNYSLTVEA
TDGNRYISTQVFIKVDTNNHQPQFSQPQYEVSIPEDTAPETGILQLSATDRDVCDDCVPV
KRNLVRVIVNVEDTNDNTPWFTSPRYSGQVFESAAVGSAVLQVTAQDRDRGSNAEISYII
ESGNEDNSFAIDLVLGTITVAKELDRDDKSQFELAVKASDRGAPPLSAVTTVRIAVTVPD
NARPRFPEEEISAVISETAPVGSLVTLVSASSHSSVLYQIREGNVNNAFDINPTSGVVVT
QRLLDYESVSSYRLTVQATNMAEMVNYVTVLIHLRDENDNSPVFTQTEFRGVVSESAPVN
SVVLTNGRSPLVIQATDADSDLNGRLVYQIVEPYALEYFAIDSSTGVIRTVTGLDYEQRS
EFNFTVQVHDSGKPKLFSEIIAYVTIHITDVNDCPPTFSQDVFETSVIVPTYSGVKVISI
NATDLDSKLLFSISDGNGQFMIDPKSGVISVLNPARLRNGYELTVGVSDGKFTKTAMVKI
NIRENQNKDLAFAKDLYTVSLPENSSERKTLAVVTAARKRLNEPLFYTILNPQGRFEIGH
TSGVLFTTGVPFNREEQDTFEIVVEVTKEHRSSGVAHALVVVTIEDVNDNEPVFVGLPYS
ALVQLDSAVGQVVRQITTVDKDIGRNAEIKYQLKEDWGYFQISPGEISLKGTVHPKDVDK
FAISVIAKDRGDPSLSATVEVAVTVVSKAVPVFEKSSYDIVIPEDVPLDTSIVKIQANAS
EGPRTVYSISKGDPLGQFSISFITGVFHVVQPLDYETHPAYRLSIRASDSLTGAHSEVFL
DIILEDVNDNAPTFKERLYEASVSELADIDSSVLQVSATDSDSGNNKVLFYQLVEYFTID
QESGVIMTSGLLDFEVGPQHRLVVRAVDGGVPAQSSEVQVIISVTDINDNPPVFTHHLYK
AIVSQLAQRGHFVACVRTSDADLSDLEYSLLSGNEDSSFTIDGRSGEIVISKYRKRETLY
NLSVSVSDGLYSSVCNVQVTVVTSNLHSPSFSHTDSVVELLENSPVGTLVTATDKDLGVY
GKVTYYIVNDVAKDKFTINENGEIFTVESLDRENVITISISLMAKDGGGKLGFTSVNVIL
TDVNDNAPQFRAAEYKANIPRDVSEGTVIVRVTAVDADEGSNADITYDIHPLNGDIIAKN
NFTDYKNDLFSFYVSAKDGGDPPKKTLVPVYIRLLPKEVTVPKLVELQKRWSVSEGLPIG
YNLVKGSTPESNQDQVFVVNTDTGKLKLAKRLDFETTKWYLLTLQAQDVITTAQLHIQVQ
DVNDNSPQFESDSYRSFVVENLPKGTSVIQVKATDLDSGLNGQVTYSLFAVDEESGWVTT
LKELDREQQDRYSVAVLATDRGHDGRLNTAATVEVTVVDVNDNPMHFTAEVFRASVSEDI
VPSRAITVLRTIDRDSEDLN
>Om_XP_021438836
NDLRPLFSPTSYTVSVPEHADIRTSIVRVTATDADVGSNAEYYFSLEHTHMFAIHPTSGV
ITLMARLDYAKRRLFEMDVLAVDRGMKLYGSSGFSSTAKLTVRVLQANDHAPVLTAVPLA
PSATDTDPTYAEIASLSIVAGDPLQQFEYRVKAIKDVDWDSCQFGCNLTLQAEDKGSPPQ
FSSAEVIRVRPPTFEKNIYRVNLTEFSPPNTSVVMVRAMPNHPMLKYSIKYPKIFTINSN
TGLITTASTRVVINVIDVNNNAPVFQQPTYKGNVNENVPVGTSILTVSASDMDEGENGYV
TYTIANPQPFNIDYFTGVISTARELDYEKMPRVYNLRVRASDWGSPFRREVETPVSITLN
NLNDNEPLFEKVDCEVSLPRYYRVGEQIVAVSAIDADDMEGVQHVVIDGNSLGLFDLTPD
TGLLSLKLPLSLQISANDGETSSKPMFVNITVCVDTGVVGRMAEKLLHSINNYFPHFSTP
KVIEVKEDLQVGMRIAHLSAIDADHGFSGTLMFVISGGDVESRFMIEMDTGWLKIMEPLD
REIMDQYTLNITVYDLGTPQRSASHVLQINVLDSNDNSPNFLQYSVSIREDTDVGTAVIQ
VDATDKDSGANRIIRYSLMAESDHFVIDDQTGVVKVKSPLDRELHPTIILKVVACDQAVD
EPQMVSTVSLKIVLEDINDNPPRFFPLHQRVKVREDLPLGAVVVWLQAHDPDQGQSGQVR
FSLLDNGDGDFDVDKTNGAVRILRTLDFERRQVYNLTARAKDKGKPESLSCTCFIEVYVV
DVDENLHQPRFASFVDKGSVREDAPVGTTIMTVIAQDNDQGRAGEIRYSIRDGSGLGVFT
IDEESGVIQTQELLDHETTDHYWLTIYGTDLAVVPQSSFMEVYIEVEDVNDNAPQTSEPV
YYPEVMENSPKDVSVIQVEAVDPDSGNNPQGFFSIDHQTKLDREQQEEHTLEITVTDKGV
PARSTAVRVVVRVQDENDNTPQFLEKIYKVQLPEYRVIASDRDTGPNAEVSYSIEGDEQG
RFFIEPQTGHVFSEVVSAGQHAILTIKVVDNGRPQRSSTCRLHIEWIVRPPSSEPLVFEE
TSLVFSVMETDPVAHMVGVISTQGGNADSRFDVGKGSGTVILAKPLHAEPKSNYSLTVEA
TDGNRYISTQVFIKVDTNNHQPQFSQPQYEVSIPEDTAPETGILQLSATDRDVCDDCVPV
KRNLVRVIVNVEDTNDNTPWFTSPRYSGQVFESAAVGSAVLQVTAQDRDRGSNAEISYII
ESGNEDNSFAIDLVLGTITVAKELDRDDKSQFELAVKASDRGAPPLSAVTTVRIAVTVPD
NARPRFPEEEISAVISETAPVGSLVTLVSASSHSSVLYQIREGNVNNAFDINPTSGVVVT
QRLLDYESVSSYRLTVQATNMAEMVNYVTVLIHLRDENDNSPVFTQTEFRGVVSESAPVN
SVVLTNGRSPLVIQATDADSDLNGRLVYQIVEPYALEYFAIDSSTGAIRTVTGLDYEQRS
EFNFTVQVHDSGKPQLFSDIIAYVTIHITDVNDCPPTFSQDVFETSVIVPTYSGVKVISI
NATDLDSKLLFSISDGNGQFMIDPKSGVISVLNPAQLRNGYELTVGVSDGKFTKTAMVKI
NIRENQNKDLAFAKDLYTVSLPENSSERKTLAVVTAARKRLNEPLFYTILNPQGRFEIGH
TSGVLFTTGVPFDREEQDTFEIVVEVTKEHRSSGVAHALVVVTIEDVNDNEPVFVGLPYS
ALVQLDSAVGQVVRQITTVDKDIGRNAEIKYQLKEDWGYFQISPGEISLKGTVHPKDVDK
FAISVIAKDRGDPSLSATVEVAVTVVSKAVPVFEKSSYDIVIPEDVPLDTSIVKIQANAS
EGPRTVYSISKGDPLGQFSISFITGVFHVVQPLDYETHPAYRLSIRASDSLTGAHSEVFL
DIILEDVNDNAPTFKERLYEASVSELADIDSSVLQVSATDSDSGNNKVLFYQLVEYFTID
QDSGVIMTSVLLDFEVGPQHRLVVRAVDGGVPAQSSEVQVIISVTDINDNPPVFTQHLYK
AMVSQLAQRGHFVACVRTSDADLSDLEYSLLSGNEDSSFTIDGRSGEIVISKYRKRETLY
NLSVSVSDGLYSSVCNVQVTVVTSNLHSPSFSHTDSVVELLENSPVGMLVTATDKDLGVY
GKVTYYIVNDVAKDKFTINENGEIFTVESLDRENVISISISLMAKDGGGKLGFTSVNVIL
TDVNDNAPQFRAAEYKANIPRDVSEGTVIVRVTAVDADEGSNADITYDIHPLNGDIVAKN
NFTAYKNDLFSFYVSAKDAGDPPKKTLVPVYIRLLPKEVTVPKLVELQKRWSVSEGLPIG
YNLVKGSTPESNQDQVFVVNTDTGKLKLAKRLDFETTKWYLLTLQAQDVITTAQLHIQVQ
DVNDNSPQFESDSYRSFVVENLPKGTSVIQVKATDLDSGVNGQVTYSLFAVDAESGWVTT
LKELDREQQDRYSVAVLATDRGHDGRLNTAATVEVTVVDVNDNPMHFTAEVFRASVSEDI
VPSRAITVLRTTDRDSEDLN
>Dr_teleost_FAT1B__ENSDARG00000019063_chr14_MTNR1Ab
NDLRPLFSPTTYSFFVPENSAARTSIGRVSATDADTGTNGEYYFSFEWTDMFSIHPTSGV
ITLTGKLDYSEMALYEIDVLAVDRGLKLYGSSSSSSTAKLKVHVLQANEHSPVITAVPLT
PWNTTSDPTYAEIASLNIVAGDPLQQFEYKIKAVKKVEWEGYSFGYNLTLQAKDKGNPPK
FSSAIVVRLGSPRFEKSIYRVTLSEFAPPHSPVVMVKTVEKHSKINYLLEFKMQFIINPN
TGLISTASTKVVVSVSDMNNNAPVFQKSNYEASIAEHVPIGTSVLTVSATDMDDGENGYV
TYSIVNKQPFVVDYFTGVISTTEDLDYETMPSKFSLRIRASDWGSPFRREAETIVSISLT
NLNDNKPQFENIDCDVRVPRSLGVDEQIIVVSAIDADDLGVVQYRIDTGNNMNLFKLDST
SGVLALKKTLRLQITASDGEISSTPLFLNLTICAETGVLRTLAGLLLHSVNRHAPRFSTP
AVIEVKENLPVGTSVALLRAADSDSGFNGKLLFVISGGDFDSCFTIESDTGWLKVFQPLD
RETTDRYTLKITVYDLGLPQKSSSHLLDVKILDANDNSPEFLQYIVDISEDTAIGTDIIQ
LEAKDKDLGVNGMVRYSFLTETDKFNIHEETGIVSVMRLLDREANPVFVLRVAAFDAAID
EPKLVSTVLLRINLEDVNDNPPMFVPQHYHIRVREDIPVGTLVLWLETHDPDLGLSGQVR
YSLTDGDDGNFQVDKMSGAVYVSQTLDFETRQIYNLTAKAKDRGRPNPLSSSCFIQVEIV
AVNKNMYRPNFPFFVDWGTVLEDASVGTSVLKVAAHDEDSGRDGEVRYSIRGGSGLGVFT
INEESGIITTQEILDRETNNHYWLTVYATDQGIVPLSSFVEVYIEVQDVNDNAPLTTEPV
YFPSVSENSPKGVSVIQIQAFDLDSESNPQGFFAIDFQTKLDREKQAEHLLEITVSDDGS
PSKSTVVHVIVNVLDENDNSPQFLEKIFKIRLVEYRVIAYDRDESPFSDISYAIEEEEQG
KFFIEPTTGFVFSEAFSAGEYNIITIKASDNGKPSKSSICRLHIEWIPKPLAKQALAFEE
IPLSFSVMENDPVAHMVGVISAQGGSTDSRFDVEKASGTIIIAGALDAERQSNYNLTVEA
TDGTRSISTQVIIQVDTNEHRPKFSQNHYEISIPEEIQPGMKILEINATDKDVRDQGVPV
KSNVVRVIINVEDSNDNPPWFTSSQYAARVFETAAIGSSVLQVTALDKDKSFNAEILYSI
DSGNHGTSFIIDQSSGIITVARELDCETRDQYELIIKASDKGEPSLSAVTAVRITVTISD
NTKPKFPSNSLSAEVSENVPVGSFVTLVSAFSQSTVFYQIIEGNEKGAFDINPNSGAVIT
RKKLDFETLSSYKLIVQGTDMAEMSSSVTVNIYLKDENDNAPVFTQSEYTGFISESAIIR
SVVLNSQKAPLVVRATDADQHSNARLVYQIMEPFACNYFSIDSRTGAIQTLSNLDYEQRR
IFNFRVQVHDTGNPRLFAQDTANVTIHIININDCAPKFTQDSYEATLLLPTYKGVKVITV
KATDEDNKLHFEIVDGNNKFWLDPTFGDIFVQNTTQLRSRYRLTVQVSDGSFIGCANVKV
NVKDNKSHNLKFTQDIFTAQVQENATEKKTLAVLSVVGNRVNEPLFYSILNPNSKFEIGR
TSGVLFSTGIPFDREEQDLFEIIVEVIKEPGLNGPAHVLVKVQVEDVNDNAPFFVDQPYH
AVVQVDQTVGSVFAKVTTVDRDIGKNAEITYYLKGHDKYFQVNPGEISLKRPLELESIGK
YVINITAQDEGEPPLFSNAEVVISVVNKATPIFERPFYKIEILENVLVGTSILQVVANQS
AGPRTVYSISGGNPFSQFDIHFNSGLIKVIQPLDYEAHPAYRLSIQATDSLTGANSDVFV
DIILEDVNDNAPKFEAAVYSISISESTVIGTSVLQVVAMDPDAQSNAILFYKLHDHFRID
AETGVIWTAGLLDHETQSQHDLIVKAVDGGAIQLSSEVQVTVYITDLNDNPPIFAQQLYN
ATISKISSPGQLVTCVKAFDADSHGLEYAILSGNDNNIFAIDALSGEIVIANISRLKHFY
SLILSVTDGVFCASAEANIYVMGENSHSPSFTQDEYLIELAENSPVGTLVGAIDEDPGKY
GQLTFFIMNDIARDKFNINEDGQIYTEESFDRENPEEIRISLMAKDGGGLLGFCNVIVIL
SDVNDNSPKFKHSEYKVTVPRDAPSSTTVIKTTAVDEDEGSNADIVYEIHSLSGAIVTKE
SLIGLENGLYSFFVKAKDSGSPPKQSIIPVSIRIVPPETSIPKFAEPSLWLELSEDLAVG
YSLVGGNTPESNKHDVFAIDSTTGKLILTKRLDYETIKWYHLAVQVREIISTVDVSVHLK
DVNDNSPQFESFRYQSCIAENLPKGTSVVQVKATDLDSWLNGQITYALFSVNSETGWITT
LMEIDREKTDQYRITVVATDGAQGLQMTGTTVVEVTVVDTNDNPPLFTEAVFKGAVREDE
TPGTVVTILSYVDSDSDEVN
>Dr_teleost_FAT3B_ENSDARG00000087709_chr10_MTNR1Bb
NDLRPLFSPTSYAINIPESTPLGSNVAQVTATDADIGSNGEFYYFFEEVEEFAVHPTSGV
VSLTAKPNADKKSRFDLEVLAVDRGMKVYGNSGISSTAKLVISVLRINEFPPTLTAVALY
PLISDKEPVYAEIEWVAIIAGDPQEQFEYKLKMSEPVNWDKFPYGCNLTFQAKDRGTPPR
FSSAQTVQLLVKSFERKTYKTSIIETAPPGTIVETVRISPRPPVVSYALSLTSDFIINPL
TGVIATMTAKVQIKVEDANNNSPIFTSTFYEVFVNESIPIGTVILTLSAVDDDKGENGCI
TYSIASPLPFIINQTTGELMTSKELDFESSLETYVFAVRASDWGSPYRRESEVNVTVQVL
NINDNQPLFERVSCKGAIGRDFPVGQTIIIMSAIDIDELGLVKYDILSGNEQDVFSLNPD
SGMLSLKRPLNLKIVASDGEMLSEPTFVNISLCRDTKVAQKLAEKLLFSVNKQTPQFSFP
SDIVVREDMPVGASVLQVNTNDGDTGYNGRILHAISDPNSDSCFNIDIETGLIYIYQPLD
RERSDRYLLNITVYDLGIPQRSSWRLLTVNIEDVNDNSPEFSLYTAVVTENAAIGTEVIQ
VTASDNDLGVNGEISYTLLTNTPLFSINSETGSVYVSGHLDRESISDFTLKIQATDKAER
GNQMFSETTLRVYLEDVNDCAPVFIPKSYSCRVLEDLPIGAVIAWLQTQDPDIGSGGWVR
YSLPNDFNGTFKINSESGAIKVAKDLDYEKQQFYNLSLVAEDLGFPVKLRSESYLEVEII
DVNENLNEPYFSEFAVRGSVKENSRHGTSVLQVTAQDDDKGRDGVIRYSINARSGLGRFS
IDEETGMIYTADSLDCEAQDSYWLTVYATDRGVVPLSASIEVFIQVEDVNDNAPLTSEPI
YHSYVMENSPKDVSVVRVQAQDPDVTANPQNFFSIDYNTKLDREQQAEHFLEVTVMDGGG
IFRQSTVWVIVHVQDENDNTPEFKESIYRISLPEYRVFAYDRDEGSNADLTYSIVDNDDG
KFVIDAKTAMVYSKMVTAGGYDILTIKAIDNGTPQKWSTARLHVEWIRKPPSPLALRFTA
AVYNFTVVENAKVYESVGVVSVWVGNYDGPFDIQRGIGTIVIARPLDAETQSLYNMTVQV
TDGTNTATTQIYIKVDSNDNTPIFSEHTYEVLVSEDTPADTEVLRVRARDRDVKDQEFPY
YRDLARIIVTLEDANNQPPIFTQTNYDSTVFESAPPGTSALQVIALDRDFGRNREIVYSI
DAGNTGGIFGIDPLSGIISVARELDLTTVGFYTLTVRATDGGTPPLSSTTTCRIAISLSD
FSSPKFAQQEYQAEITENVAVGTFVIIVCAISRSMLIYEIKEGNDERRFKINRYTGVITT
QKDFDFEMTSSYILVIQAVNMAGIASSVTVCIQVVDENDNPPVFQDLTYTGTISEAAHVN
SVVMTEDGKPLVIEATDADKNHNALLVFQIVEETAKLFFTVDSGTGSVRTIAKLDYETFS
SFYFSVNVRDCGRPQLTAEKPAKVLIRVVNINDSPPQFSQEAYETILLLPTYVGVEVLRV
EATDPDTDLMYYLADSNEHFEMEPSSGVLTVKNSKLSKDRYRFNVKVSDGRYFCTALVTV
LVREAMDSGLLFSQTSYSSSVLENSVNITTVSIVNAVGNRLNEPLKYTLLNAGTSFTIRP
TSGVIQTTGVPFDREQQELYELVVEASREYDQLRVARVTVRVEVEDVNDNAPEFVGLPYY
AAVQVDAQPGSSIFQVSATDLDKGINGAVYYELKENHPHFEVNKGDLTLKKIFDADLSNE
YPLVVLARDAGYPFLFTVAELPVTVVNKAMPVFDKSFYGISVREDIGVSTPILCINATSP
EGQNIIYTIVEGDPYFQFDIGFDSGVISVIYPLDYETTSNYRLTIRSTDTLTGARSEVDV
DIVVVDVNDNAPVFRNTSYSTTLPENTMIGSSVIRLLATDKDSEKNNVISYEILDYFHID
STSGLLLTARLLDYELTSSFSFIVRATDNGSPSQNCEVTVTVFLSDVNDNPPSFNQPLYE
AFVSELAPRGHIVTCIQASDLDSSDLRYSILSGDEKMNFVIDSQTGVISLSSQRRMRPTY
NLNVSVSDGVFTNTAQVNIRVMGANLYSPVFSQRFYLAEVRENAPAGSRVIATDEDSGIF
GQIMYSFINDLGKSQFNIGADGLITTAQKLDRENPINIVLTVMALDGGGRASFCTVRVIL
ADENDNAPRFRAMEYRVSIKANVPMGSLVTQIQAQDPDSGDNGRVAYEIEPDSGWMVTKG
SLAHLRGTVLSFFVKATDGGVPAKHSLVSAFIHVLPPDASVPSFSQPQYSFTVPEDTPVG
FSVVNGETGESNQSGTFLVERETGLLRLVSPLDYELTNIYHFKVAATESMSVVDVEVKVL
DVNDNKPLFETSSYVAMVMEGMPRGTRVIQVRALDPDWGSNGQVNYSLFVIDSKTGWITT
LGDLDHEICPSYTFNVVASDLGEGVSLSSTAVVTVAIADVNDNPPTFEREYYRGAVRESD
PLGEVVSVLSTRDGDSSDQN
>Dr_teleost_FAT3a_ENSDARG00000033840_chr15_MTNR1Ba
NDLRPLFSPTTYSVTIAESTPLRTSIAQVTATDADIGSNGEFYYFFERMELFAVHPTSGV
VSLSGKLDVDIQSRYDLEIQAVDRGMKLYGNNGVSSTAKLFVHVERINEHVPTLSIVTLA
PVWTEKSPIIAEIETVSIVAGDLLELFEFVLRAMEQFDWDSYPFGLNLSLQARDRGTPQK
LSAVQIVHLRLSTFQKDQYEVLLSEVAPPGTIVEAVKLQPEPDDAEYILTPSADFSINTM
TGVISTLRVKVKVILEDANDNAPSFAQQSYEVFVNESVAVGTTVVVVTASDDDHGENGYI
TYSMASPLPFSVQQFTGAVTTTQELDFESSLESFSFVVRASDWGSPYRRESEVNITVHLE
NVNDNKPLFEKVACVGVVSRELPVGEVIATISAIDIDELELVKYKILSGNERGYFELNPD
SGVMTLRHSLSLKITATDGEHFSDPMFVNISVCTETRVAQRLAEKLLFSVNRQTPQFSFP
TDITVREDVEVGTSVFQVKALDGDTGFNGQLLHAIADGNTDSCFSIGILNGVISIFLPLD
REKTDRYLLNITLYDLGQPQRSTWRLLTVYIADANDNAPQFLQYHARISENTPIGTEVIQ
VEATDKDQGLNGEIQYSLLTSTSQFGINSSSGIVYVAGQLDRELVPLFILKVEARDRAER
AAQRFSITTLKITLEDVNDCPPAFIPSVANARALEDLPVGTVIAWLDTQDPDLGLGGQVR
YLLDNDYDGRFEVDKTSGAIRLTKELDYETQQFFNLTVRAKDKGRPVSLLSVSFVELEVV
DVNENLYAPYFSSFAMNGSVKESVRIGTSVLQVSARDDDTGRDGEVQYSIRDGSGLGRFT
IDEETGVIYTTDLLDRETQDSYWLTVYATDLGVVPQSAALQVYIQVEDVNDNSPLTSEPM
YHATILENSPKDQSVIQIQAQDPDATTNPQNFFSINPRTKLDREQQAEHVLEVTVSDGGS
SPRHTTVWVVIQVLDVNDNKPTFPEKMYQVRLPEYRVFAYDQDQGANAELSYSIIDNEDG
KFIIDAKTGVVSSKQFSAGTYDILTVKAVDNGRPQRWATARLHIEWIRRPPNPIPLAFDE
PLYNFTIMETDRVADIVGVVSAQGGDVDSMFDVEKGVGTIVIAKPLDAEQRSFYNLTLEV
TDGTNVANTQVHITVDNNDNPPVFSQPTYDITITEDTPPDTEVVQVLASDRDVKDQEFPY
RRSLARVLIGVEDVNDHAPLFTMVMYDGQVYESAALGSAVLTVTALDKDKGQNAQISYSI
DSGNTGNTFRIDPVLGIISLARELDLSSIGHYVLSVKATDNGSPALSSTAVVRIAVTLSN
NAGPKFPQNEYQAEISESVAIGTSVVTVNALSLSTLTYDIRHGNGHRTFRINQYSGVITT
QKSLDFETVSSYVLIVTASNMAGQASNATITVVVLDQNDNAPVFQQLHYRGSISEGAGLN
SVVQSDDGQPLVIRASDADRNHNALLVYQIMEESARRFFAVDAGTGSIRTIAQLDHETTP
TFRFHVNVRDSGHPQLSAERPAEVTIEVQDVNDCSPKFSQDSYEAVLLLPTYEGVEALQV
FATDPDSELTYSLTDGSEHFSIEPSTGLLTVRNSTFSKERFRFNVRVSDGRFSSTALVTV
LVHEALDSGLAFTHSAYNANIEENNGNITTVAVVTALGNKLNEPLRYTLLNAGGKFRIKP
TSGAIETVGVPLDREEKEEYGLLVQAGREEDRLRVARALVRVQVTDVNDNAPVFVGLPYY
AAVQVEAEPGTAIFRVTAVDRDKGLNGEVNYFLQDELGHFEVDRGELRLRRAFEADLSSE
YQVLVFARDMGTPPLSSSVTFPVTVVNRAMPVFDRPFYSVKVSEDIPVWTPILGINASSP
EGQSVLYTITHGDPGTLFSIGFDTGVISVIAGLDYETSPAHRLIVRATDCLTGARAEVDV
EVTVLDVNDNPPVFEQPSYKAVISESAMIGTAALQVLATDSDSEKNAAVRYQIIDHFHID
SSSGLILTARSLDHETIQRYVFLVKATDNGFPPLSSEVWVTVDVTDTNDNAPVFNQLLYE
ASINELAPKGHFVTCIQASDADRSDLQYGLVSGNERMLFELDAASGVLTLSGQRRMPSAI
TLNVSVSDGVFTSTAQVHVRVERANLHSPQFTQGMYEADVRENAPPGSKVIAQDADPGPF
GDVRYVLLSDAARDLFTIDSSGQITTLERLDREERSEMVLSVAAVDAGGRSGYCSVRVTV
IDENDNVPLFGASEYHASVRSEVEPGTLVIQVQAWDLDQDANGQVSYDIDPDSGWVVTKG
NFAPLRGSVLSFLVKASDGGAPIRHSLVSVYIHVLSADAHIPSFSQPQFSFTVPEDMPIG
FAAVIGQTPESNSEGVFLVDKESGMIKLDKALDRELTQIYHFKVVAMDAVSAVDVEVKVQ
DVNDNKPAFESDTYETSVTEGLSPGTRILQVRALDPDWAANGQVTYSLFTIDSSSGWIST
LKGLDHEQNPAHSLTVWAFDLGDPASQSSSTTITIAVSDSNDNIPQFLQPRYYGSVRESD
APGEVVAVLNTRDNDSSPGN
>Ps_reptilia_FAT3_ENSPSIG00000004332_MTNR1B
NDLRPLFSPTTYSVTIAESTPLRTSIAQVTATDADIGSNGEFYYYFNKVDLFSVHPTSGV
ISLSGRLNYDEKNRYDLEVLAVDRGMKLYGNNGVSSTAKLYVHIERINEHAPTINVVTHI
PFPLDKEPTYAEIESVSIVAGDPLEQFEYKIKERKPIDWDSFPYGYNLTLQAKDKGSPQK
FSAVKLVHIASPKFEKEVYDVSISEISPPGVVVAIVKLVPEPQGVEYKISPNQDFKINPR
TGLIVTLKAQVIVRLEDANDHIPEFTQPSYSSFVNESVPVGTSILSVSAFDKDRGENGYI
TYSIASSLPFTINQFTGVISTSEELDFESSPESYRFIVRASDWGSPYRHESEVNVTIYIG
NVNDNKPLFEKVACQGVISSDFPIGGHITAVSAIDIDELELVKYKIISGNDLGIFYLNPD
SGVLQLKKSLGLRITATDGENFADAMFVNISVCRETRVAQKLAEKLLYSINRQAPYFSFP
SDVTVREDLPVGASILKIKAYDVDSGFNGKVIYTISDGNTDSCFNIDMETGLLKVLMPMD
REKTELYLLNITIYDLGNPQKSTWRLLTVTVEDANDNSPVFLQYSVNILESTSIGTEIIQ
VEARDKDLGSSGEVSYSVLTDTQQFAINSSTGVVYVSDQLDRESKANYTLKIEARDKSEN
GHQQFSVVPLKVFLDDVNDCSPTFIPSSYSVKVLEDLPVGTVIAWLETQDPDLGLGGQVR
YSLVNDYNGRFEIDKASGTIRLNKELDYEKQQFYNLTVRAKDKGRPVSLSSVSFVEVEVV
DVNENLYTPYFPDFAVIGSVKENARVGTSVLQVTARDEDSGRDGEIQYSIRDGSGLGRFS
IDEETGVIYTADVLDRETTKSYWLTVYATDRGVVPLYTTIEVYVEVDDVNDNAPLTSEPI
YYPAVTENSPKDVSVIQIQAQDPDSITNPQNFFAINPKTKLDREQQAEHFLEVTVTDGGI
SPKQSTIWVVVQVLDENDNKPQFPEKVYQVKLPEYRAFAFDKDEGPNAEISYSIVDNDDG
KFFIDPKTGMVSSKQFTAGNYDILTIKAVDNGRPQKSSTARLHIEWIKKPPSPVSLTFDE
PFYNFTVMESDRVTEIVGVVSVQGGNFDSSFDAEKGAGTIVIAKPLDAEQRSIYNMTVEV
TDGTNVATTQVFIRVDNNDNGPEFSQPSYDVTISEDILPDTEILQVEAIDRDVRDQEFPY
RRNLARVVINVEDSNDHSPYFTSPLYEASVYESAAIGSAVLQVTALDKDKGENAELIYTI
EAGNTGNTFKIEPVLGIITVLKEPDLTTMGQFVLSVKVTDQGSPPLSATAIVRISVTMSD
NSHPKFAHKEYQAEVNENVDIGTSVILISAISQSTLVYEVKDGNVDGAFTINPYSGVITS
QKALDYERTSSYQLIVQATNMAGMASNATVNIQIVDENDNLPVFLFSQYSGSISEAAPLN
SIVRNSANNPLVIRATDADSNQNALLVYQIVESTAKNYFTVDSSTGAIRTISNLDHETIA
HFHFHVHVRDSGNPQLTAESPVEVTIEVTDINDNPPVFSQAVFETVLLLPTYFGVEVLKV
KATDPDPELMYSLIEGNDHFLIDSNTGVLTIKNNTLSKDHYMLTVRVSDGKFYSTAVVTI
MVKEAMDSGLHFTQSFYSTSISENSTNITKVAVVNAVGNRLNEPLKYGILNPGNKFKIKS
TSGLIETTGIPFDREKQELYELVVEASRELDHLRVARVVVRVNIEDINDNAPVFVGLPYY
AAVQVDAEPGALIYRVTAIDKDKGANGEVSYLLKEDYGHFEIDRGSVTLREAFNSDLSNE
YLVIILAKDGGNPSLSASVELPITIVNKAMPVFDKPFYTASVNEDVEMHTPILSINATSP
EGQGIIYIIVDGDPYNQFNIEFDTGVLSVISPLDYEVNSVFKLTVRASDALTGARAEVTV
DLIINDVNDNPPVFDHSTYNATLSEASLIGTPVLQVVAADADSENNKIIQYQIVDYFHID
STSGLILTARMLDHELLQQCSLKVRATDNGFPPLSSEVLVSIYVTDMNDNPPVFNQLIYE
SYVSELAPRGHFVTCVQASDADSSDLEYSILSGNDRTSFIMDSKSGIITLSNHRKMEPMY
SLNVSVSDGLFTSTAQVHIRILGANLYSPVFSQSIYMSEVRENAAPGTKVIATDGDSGIY
GQINYSIINDFAKDRFFIDNNGQILTTEKLDRENPLEISIFLRALDGGGRMTFCTVRVIV
VDENDNTPQFMTIEYRASVKADVGKGHLVTQVQALDPDDGVNSRITYEIDPDNGWMVTKG
NFNQLKNTVLSFFVKAVDGGIPMKHSLIPVYIHVLPPEAVLPSFSQPQYSFIIPEDSVIG
YSTVNGELAENNKEGIFIIDQDTGIIKLDKRLDHETNPAFHFKVAATDIVLTVDVEIKVL
DVNDNKPVFEAASYEAVIMEGMPIGINLIQVKAIDADSGANGQVTYTLFTIDSNSGWIST
LKDLDHEKNPAFTFAVVASDLGEAFSLSSTTLVSVTVTDINDNAPVFEHGVYRGSVKESD
PPGEVVAVLSTWDEDTSEVN
>Hs_mammal_FAT3_ENSG00000165323_MTNR1B_chr11
NDLRPLFSPTTYSVTIAESTPLRTSVAQVTATDADIGSNGEFYYYFNKVDLFSVHPTSGV
ISLSGRLNYDEKNRYDLEILAVDRGMKLYGNNGVSSTAKLYVHIERINEHAPTIHVVTHV
PFSLEKEPTYAEIESVSIVAGDPLDQFEYKIKERKQIDWESFPYGYNLTLQAKDKGSPQK
CSALKAVYIGNPRFEKEVYDVSISEFSPPGVVVAIVKLSPEPIDVEYKLSPGEDFKINPR
SGLIVTLKAQVTISIEDANDHTPEFQQPLYDAYVNESVPVGTSVLTVSASDKDKGENGYI
TYSIASLLPFVINQFTGVISTTEELDFESSPEIYRFIVRASDWGSPYRHESEVNVTIRIG
NVNDNSPLFEKVACQGVISYDFPVGGHITAVSAIDIDELELVKYKIISGNELGFFYLNPD
SGVLQLKKSLALRITATDGENLADPMSINISVCRETRVAQKLAEKLLYSINRQGPYFSFP
SDVAVKEDLPVGANILKIKAYDADSGFNGKVLFTISDGNTDSCFNIDMETGQLKVLMPMD
REHTDLYLLNITIYDLGNPQKSSWRLLTINVEDANDNSPVFIQYSVNILESSGIGTEIIQ
VEARDKDLGSNGEVTYSVLTDTQQFAINSSTGIVYVADQLDRESKANYSLKIEARDKAES
GQQLFSVVTLKVFLDDVNDCSPAFIPSSYSVKVLEDLPVGTVIAWLETHDPDLGLGGQVR
YSLVNDYNGRFEIDKASGAIRLSKELDYEKQQFYNLTVRAKDKGRPVSLSSVSFVEVEVV
DVNENLHTPYFPDFAVVGSVKENSRIGTSVLQVTARDEDSGRDGEIQYSIRDGSGLGRFS
IDDESGVITAADILDRETMGSYWLTVYATDRGVVPLYSTIEVYIEVEDVNDNAPLTSEPI
YYPVVMENSPKDVSVIQIQAEDPDSSSNPQNFFAINIKTKLDREQQAEHFLEVTVTDGGP
SPKQSTIWVVVQVLDENDNKPQFPEKVYQIKLPEYRAFAFDRDEGPNAEISYSIVDNDDG
KFFIDPKTGMVSSKQFTAGSYDILTIKAVDNGRPQKSSTARLHIEWIKKPPSPIPLTFDE
PFYNFTVMESDRVTEIVGVVSVQGGNFDSAFDAEKGVGTIVIAKPLDAEQRSIYNMSVEV
TDGTNVAVTQVFIKVDNNDNGPEFSQPNYDVTISEDVLPDTEILQIEATDRDVRDQEFPY
RRNLARVIVNVEDANDHSPYFTNPLYEASVFESAALGSAVLQVTALDKDKGENAELIYTI
EAGNTGNMFKIEPVLGIITICKEPDMTTMGQFVLSIKVTDQGSPPMSATAIVRISVTMSD
NSHPKFIHKDYQAEVNENVDIGTSVILISAISQSTLIYEVKDGDINGIFTINPYSGVITT
QKALDYERTSSYQLIIQATNMAGMASNATVNIQIVDENDNAPVFLFSQYSGSLSEAAPIN
SIVRSLDNSPLVIRATDADSNRNALLVYQIVESTAKKFFTVDSSTGAIRTIANLDHETIA
HFHFHVHVRDSGSPQLTAESPVEVNIEVTDVNDNPPVFTQAVFETILLLPTYVGVEVLKV
SATDPDPELTYSLMEGSDHFLIDSNSGVLTIKNNNLSKDHYMLIVKVSDGKFYSTSMVTI
MVKEAMDSGLHFTQSFYSTSISENNTNITKVAIVNAVGNRLNEPLKYSILNPGNKFKIKS
TSGVIQTTGVPFDREEQELYELVVEASRELDHLRVARVVVRVNIEDINDNSPVFVGLPYY
AAVQVDAEPGTLIYQVTAIDKDKGPNGEVTYVLQDDYGHFEINPGNVILKEAFNSDLSNE
YGVTILAKDGGKPSLSTSVELPITIVNKAMPVFDKPFYTASVNEDIRMNTPILSINATSP
EGQGIIYIIIDGDPFKQFNIDFDTGVLKVVSPLDYEVTSAYKLTIRASDALTGARAEVTV
DLLVNDVNDNPPIFDQPTYNTTLSEASLIGTPVLQVVSIDADSENNKMVHYQIVDYFHID
SSSGLILTARMLDHELVQHCTLKVRSIDSGFPSLSSEVLVHIYISDVNDNPPVFNQLIYE
SYVSELAPRGHFVTCVQASDADSSDLEYSILSGNDRTSFLMDSKSGVITLSNHRKMEPLY
SLNVSVSDGLFTSTAQVHIRVLGANLYSPAFSQSTYVAEVRENVAAGTKVIATDGDPGTY
GQISYAIINDFAKDRFLIDSNGQVITTERLDRENPLEVSIFVRALDGGGRTTFCTVRVIV
VDENDNAPQFMTVEYRASVRADVGRGHLVTQVQAIDPDDGANSRITYEIDPDNGWMVTKG
NFNQLKNTVLSFFVKAVDGGIPVKHSLIPVYIHVLPPETFLPSFTQSQYSFTIAEDTAIG
FSTVNGERPENNKGGIFVIEQETGTIKLDKRLDRETSPAFHFKVAATDIVFTVDVDIKVL
DLNDNKPVFETSSYDTIIMEGMPVGTKLTQVRAIDMDWGANGQVTYSLFNIDSNTGWIST
LKDLDHETDPTFTFSVVASDLGEAFSLSSTALVSVRVTDINDNAPVFAQEVYRGNVKESD
PPGEVVAVLSTWDRDTSDVN
>Lo_Holostei_FAT3_ENSLOCG00000007262_MTNR1B_LG3
NDLRPLFSPTTYSVTIPESTPLRTSVAQVTATDADIGSNGEFYYFFEKVDLFAVHPTSGV
VSLSGKLNIDEKNRYDLEILAVDRGMKLYGNNGVSSTAKLFIHIERVNEHAPTLSVVTHI
PSLLDKDPTYAEIESVSIVAGDPLDQFEYRIKASEPVDWDHFPYGYNLTLQAKDKGFPQK
FSAVKVVHLYVNKFEKAVYEVKLSEISPPGITVAVVKLSPEPEDVEYILSPGEDFKINSL
TGLITTLRISVRVTIEDSNDHTPLFLQPSYEVFVNESIPIGTHILTVSALDNDRGENGYI
TYSIASTLPFTINQFTGVVSTNKELDFESLSESFVFVVRASDWGSPYRRESEVNVTVHIE
NVNDNHPLFEKIACQGIISYDFPIGEVITTMSAIDIDEIELVKYKILSGNERGFFDLNPD
SGVLVLKKSLNLKITATDGENFSDPMFVNISICKETRVAQKLAEKLLFSVNRQTPQFSFP
SEISVREDLEIGASVFRVKAYDGDTGFNGQVLYTISDGNKDSCFNIDMETGLITILMPMD
REKTDRYLLNITIYDLGLPQKSTWRLLTVNVEDANDNTPQFLQYNAVIPENTVIGTEVIQ
VEATDKDLGPNGAIYYTMLTSTTQFGINSTNGIVYVAGQLDREFLSVFNLKIEARDKAER
GSQRFAVSTLRISLDDVNDCSPAFIPSYYNAKVLEDLPVGTVIAWLETQDPDLGLGGQVR
YSLANDYNGKFEIDKASGVIRLAKELDYEKQQFYNLTVRAKDKGRPVSLLSVSFVDVEVV
DVNENLYPPYFSDFALIGSVKENSRIGTSVLQVTARDDDMGRDGEIQYSIRDGSGLGRFS
IDEETGIIYTTDMLDRETKDSYWLTVYATDHGVVPLYTAIEIYIQVEDVNDNAPLTSEPI
YYPSVMENSPKDVSVIQIIAQDPDSTSNPQNFFAINAKTKLDREQQAEHVLEVTVMDGGP
PSRHSTVWVMVNVLDENDNKPQFPEKVYQIKLPEYRVFAYDRDEGPNADLSYSIVDNEDG
KFFIDPKTAVVSSKQFTAGSYDILTIKALDNGRPQKSSTARLHIEWIKKPPSPVPLVFDE
PFYNFTVMEHDKVSEIVGVVSMQGGNYDSIFDIEKGVGTIVIAKPLDAEHKSLYNMTVEV
TDGTNAASTQVFVTVDNNDNGPVFSQPSYDITILEDTPADTEVLQVVATDKDVRDQEFPY
RRNLARVLVYVEDTNDHVPYFTSALYEGSVFESAAIGTAVIQVTALDKDKGENAELLYSI
EAGNTGNTFRIEPVLGIISVARELDLASIGHYVITVRVTDNGSPPLGATTMVRISVTLSD
NSSPKFPQKEYHAEINENVVVGTSVILIAAVSQSTLIYEIKHGNSERAFKINQYSGVITT
QKLLDYETVTSYLLIIQATNMAAMASNVTVNIQIIDENDNPPIFQQLRYTGSISEAVPIN
SIVLCSDNSPLVIKATDADKNQNALLVYQIVEDTAKMFFTVDSSTGSIRTIANLDHETFA
RFHFHVHVRDSGKPQLTAESPTEVTIQVIDTNDSPPKFSQDVYETILLLPTYIGVEVLRV
SATDPDSELIYTLAEGSDHFSMESTSGILTVKNNNFSKDRYRFNVKVSDGKFSSTALITI
LVKEAMESGLYFTHNMYSTSILENKTNITKVAVVNAVGNRLNEPLKYSLLNAGTKFRIKS
TSGVIQTTGVPFDREEQEFYELVVEASREHDLLRVARVMVKVQVEDINDNPPVFVGLPYY
AAVQVEAEPGSPIYRVTAVDRDKGINGEVAYYLKDDHGHFEINRGDLTLKKAFESDLSNE
YEVVVFAKDGGYPSLSSTIEFPITVVNKAMPVFDKSFYVTSVNEDIAAHTPILSINATSP
EGQNIIYTIVDGDHSSQFNIDFDTGILSVINSLDYEVTPLFRLIVRATDSLTGARAEVDV
DITVLDVNDNAPVFEKMFYKATLAETAMIGTPAVQVVATDKDSEKNNIMRYQIFDYFHID
SSSGLILTARMLDHEMIQQYNFIVRATDNGFPPLSSEVSVTVYVNDMNDNPPVFNQLLYE
SYVSELAPKGHFVTCVQASDADSSDLEYSILSGNERMNFVMDSKTGAITLSNHRKMEPVH
SLNVSVSDGVFTSTAQVHIKVLGANLHSPVFTQSVYVAEVRENAALGSKVFATDVDSGPF
GQITYSFVNDLGNDQFSIDVNGQITTMEKLDRESPANIILTVMALDGGGKASFCTVRVIL
VDENDNAPRFRAVEYRASVKADAGKGFLVTQIQAHDPDDGANSRITYEIDPDNGWMVTKG
SFNHLKNSILSFFVKAVDGGIPMKHSLVPVYIHVLSPETIIPSFTQPQYSFTVPEDIPIG
FTIVNGEMGENNQEEVFVVEKDTGVIKLDKALDHEVIDAFHFKVSATDSVTVVDVEVKVL
DLNDNKPSFETNIYEAVVMEGMPIGTKIIQVSALDADWGANGQVTYSLFTIDSTTGWITT
LKDLDHETHPSYIFGVMATDLGETISLSSTATVSVVITDTNDNAPNFVEEFYKGSGRESD
PPGEVVAVLHTQDADTSDIN
>Ss_XP_014070618
NDLRPLFSPTTYSVTIAESTPLRTSIAQVTATDADVGSNGEFYYFFEKMELFAVHPTSGV
VSLSGKLNIEEQNRYDLEIQAVDRGMKLYGNNGVSSTAKLFVHVERVNEHLPVMNVVTHV
PSWLDKDPVYAEIESLSIVAGDPMEQFEFAIKASDQVDWENFPYGYNLTLQAKDKGAPQK
FSSVRVVHVIVKKFEQESYEISLNEISPPGTIVKVVKITPEPDDAEYILTPSADFRMNTL
TGVISTLRVKVRVSIEDANDNTPTFTQLSYEVFVNESVPVGWTVLAVSAVDGDSGENGYI
TYSIASPLPFKINQFSGILTTTQELDFESSSESYVFVVRASDWGSPYRRENEVNVTVHLE
NVNDNQPLFEKVACQGLVSRDFPINEVITTMSAIDIDELELVKYKILEGNEGGFFDLNPD
SGVLTLRRSLSLKITATDGENFSDPMFVNISICRETRVAQKLAEKLLFSVNRQTPQFAFP
TDISVHEDRKVGSSVFKVNAYDGDTGFNGQMLYAISDGNTDSCFTIDMESGLISVFLPMD
REKRDRYLLNITIYDLGLPQKTSWRLLTVYVEDANDNAPQFLQYRTFIPENTAIGTDVIQ
VEATDKDLGPNGEIVYSVLTSTTQFGINSSNGIVYVAGQLDREFVSTFNLKIEARDRAEK
GNQKFSVTTLKISLEDVNDCPPAFIPSVYNTRALEDLPVGTVVAWLETQDPDLGLGGQVR
YSLANDYNGKFEVDKASGAIRLTKELDYETQQFYNLTVRAKDKGRPVSLLSVTFVELEVV
DVNENLYTPYFSHFALTGSVKESARIGTTVLQVTARDDDDGRDGEIQYSIRDGSGLGRFA
IDEETGVIYTTDTLDRETKDSYWLTVYATDHGVVPQFAIMEVYIQVEDVNDNAPLTSDPV
YHPVVMENSPKDLSFIQIQAQDPDATGNPQNFFTINTRTKLDREQQAEHVLEVTVSDGGP
SPKHSTVWVIVHVLDENDNKPTFPEKVYQIKLPEYRAFAYDRDEGVNADLSYSIVDNEDG
KFFIDPKTAVVSSKQFTAGSYDILTIKATDNGRPQKWSTARLHIEWIRKPALANPLLFDE
QYYNFTVMESDKVAEIVGVVSMQGGNTDSLFDIEKGVGTIIIAKPLDAEQRSFYNMTVEV
TDGTNSAATQVHITVDNNDNAPVFSQPTYDITISEDTPPETEVVQVLASDRDVKDQEFPY
RRNLARVLVDVEDVNDHVPVFTSALYEGSVYESAAVGSAVLQVTALDKDKGENAELLYTM
ESGNTGNTFRIEPVLGIISVARELDLSTIGYYVITVRVTDNGSPPLFATSVVRIAVTLSD
NAGPKFPQTEYQAEVTENVAVGTSVTTVSAMSQTTLTYDIRHGNSERTFRINQYSGVITT
QKPLDYETTASYNLIIQATNMAGMASNATLLIRVVDENDNPPVFQLLCYQGSISEAAPIN
SVVLNPDKTPLVIKATDADRNQNALLVYQIVEDTAKMFFTVDSGTGSIRTIANLDHETFA
SFNFHVHVRDSGRPQLTADSPTEVTIQVIDTNDSPPRFTQDTYETVLLLPTYVGVEALQV
SAMDPDTELTYSLTDGNEHFAIQPSSGIITVKNNNFSKERFRFNVKVSDGKFSSTALVTV
LVRETLDSGLFFAHSLYSSSIQENNTNITKVAVVNAVGNRLNEPLKYTLLNPGTRFRIRS
TSGVIQTTGIPFDREEQEFYELVVEAGREHDRLRVARVMVRVQVEDINDNAPVFVGLPYY
AAVQVEAEPGSPIFRVTAVDRDKGINGEVSYYLKDDHGHFEIDRGGLRLKKSFESDLSNE
YQMVVYTKDGGYPPLSSTLEFPITVVNKAMPVFDKSFYAVSVNEDVAVHTPILGINATSP
EGQNIIYTIVEGDPSLQFDIGFDTGVIRVINSLDYEIAPSFRLTVRATDYLTGARAEVDV
DVTVNDVNDNPPVFERTSYKAVLSETAMIGTPALQVVATDKDSEKNNIVRYQIFDHFHID
SSSGLILTARMLDHELVQRYDFIVRATDNGFPPLSSEVSVTVVVNDMNDNPPVFNQLLYE
AYVSELATRGYFLTCVQASDADSSDLEYSILSGNERMNFVMDGKTGIITLSGHRKMEPAY
SLNVSVSDGVFTSTAQVHVRVLGANLYSPVFGLNAYDAEVRENAAVGTKVIATDADPGVF
GQITYSFVNDVGKDQFSVDANGQITTLEKLDREDPANIVLTVAAQDGGGRASYCTVRVSL
VDDNDNVPRFRATEYRASVKSDVGKGFLVTQIQAYDPDDGANSKVTYEIDPDNGWMVTKG
SFSHLRNSVLSFFVKAVDGGIPVKHSLVSVYIHVLAPDALIPSFTQPQFSFTVPEDTPIG
FALVNGETGENNQDGVLVVDRDTGVIKLDKPLDHEVITAFHFKVTATDSVTSVDVEVKVL
DLNDNKPAFESNSYEATVMEGMPIGTMIIQVQALDPDSGANGQVTYSLFTIDSNTGWIST
LKELDHEMYPSYAFLVVASDLGETLALSSTSMVTVAVSDINDNPPRFLDERYCGSVRESD
PPGEVVAVLNTRDDDSSRVN
>Ss_XP_014070620
NDLRPLFSPTTYSVTIAESTPLRTSIAQVTATDADVGSNGEFYYFFEKMELFAVHPTSGV
VSLSGKLNIEEQNRYDLEIQAVDRGMKLYGNNGVSSTAKLFVHVERVNEHLPVMNVVTHV
PSWLDKDPVYAEIESLSIVAGDPMEQFEFAIKASDQVDWENFPYGYNLTLQAKDKGAPQK
FSSVRVVHVIVKKFEQESYEISLNEISPPGTIVKVVKITPEPDDAEYILTPSADFRMNTL
TGVISTLRVKVRVSIEDANDNTPTFTQLSYEVFVNESVPVGWTVLAVSAVDGDSGENGYI
TYSIASPLPFKINQFSGILTTTQELDFESSSESYVFVVRASDWGSPYRRENEVNVTVHLE
NVNDNQPLFEKVACQGLVSRDFPINEVITTMSAIDIDELELVKYKILEGNEGGFFDLNPD
SGVLTLRRSLSLKITATDGENFSDPMFVNISICRETRVAQKLAEKLLFSVNRQTPQFAFP
TDISVHEDRKVGSSVFKVNAYDGDTGFNGQMLYAISDGNTDSCFTIDMESGLISVFLPMD
REKRDRYLLNITIYDLGLPQKTSWRLLTVYVEDANDNAPQFLQYRTFIPENTAIGTDVIQ
VEATDKDLGPNGEIVYSVLTSTTQFGINSSNGIVYVAGQLDREFVSTFNLKIEARDRAEK
GNQKFSVTTLKISLEDVNDCPPAFIPSVYNTRALEDLPVGTVVAWLETQDPDLGLGGQVR
YSLANDYNGKFEVDKASGAIRLTKELDYETQQFYNLTVRAKDKGRPVSLLSVTFVELEVV
DVNENLYTPYFSHFALTGSVKESARIGTTVLQVTARDDDDGRDGEIQYSIRDGSGLGRFA
IDEETGVIYTTDTLDRETKDSYWLTVYATDHGVVPQFAIMEVYIQVEDVNDNAPLTSDPV
YHPVVMENSPKDLSFIQIQAQDPDATGNPQNFFTINTRTKLDREQQAEHVLEVTVSDGGP
SPKHSTVWVIVHVLDENDNKPTFPEKVYQIKLPEYRAFAYDRDEGVNADLSYSIVDNEDG
KFFIDPKTAVVSSKQFTAGSYDILTIKATDNGRPQKWSTARLHIEWIRKPALANPLLFDE
QYYNFTVMESDKVAEIVGVVSMQGGNTDSLFDIEKGVGTIIIAKPLDAEQRSFYNMTVEV
TDGTNSAATQVHITVDNNDNAPVFSQPTYDITISEDTPPETEVVQVLASDRDVKDQEFPY
RRNLARVLVDVEDVNDHVPVFTSALYEGSVYESAAVGSAVLQVTALDKDKGENAELLYTM
ESGNTGNTFRIEPVLGIISVARELDLSTIGYYVITVRVTDNGSPPLFATSVVRIAVTLSD
NAGPKFPQTEYQAEVTENVAVGTSVTTVSAMSQTTLTYDIRHGNSERTFRINQYSGVITT
QKPLDYETTASYNLIIQATNMAGMASNATLLIRVVDENDNPPVFQLLCYQGSISEAAPIN
SVVLNPDKTPLVIKATDADRNQNALLVYQIVEDTAKMFFTVDSGTGSIRTIANLDHETFA
SFNFHVHVRDSGRPQLTADSPTEVTIQVIDTNDSPPRFTQDTYETVLLLPTYVGVEALQV
SAMDPDTELTYSLTDGNEHFAIQPSSGIITVKNNNFSKERFRFNVKVSDGKFSSTALVTV
LVRETLDSGLFFAHSLYSSSIQENNTNITKVAVVNAVGNRLNEPLKYTLLNPGTRFRIRS
TSGVIQTTGIPFDREEQEFYELVVEAGREHDRLRVARVMVRVQVEDINDNAPVFVGLPYY
AAVQVEAEPGSPIFRVTAVDRDKGINGEVSYYLKDDHGHFEIDRGGLRLKKSFESDLSNE
YQMVVYTKDGGYPPLSSTLEFPITVVNKAMPVFDKSFYAVSVNEDVAVHTPILGINATSP
EGQNIIYTIVEGDPSLQFDIGFDTGVIRVINSLDYEIAPSFRLTVRATDYLTGARAEVDV
DVTVNDVNDNPPVFERTSYKAVLSETAMIGTPALQVVATDKDSEKNNIVRYQIFDHFHID
SSSGLILTARMLDHELVQRYDFIVRATDNGFPPLSSEVSVTVVVNDMNDNPPVFNQLLYE
AYVSELATRGYFLTCVQASDADSSDLEYSILSGNERMNFVMDGKTGIITLSGHRKMEPAY
SLNVSVSDGVFTSTAQVHVRVLGANLYSPVFGLNAYDAEVRENAAVGTKVIATDADPGVF
GQITYSFVNDVGKDQFSVDANGQITTLEKLDREDPANIVLTVAAQDGGGRASYCTVRVSL
VDDNDNVPRFRATEYRASVKSDVGKGFLVTQIQAYDPDDGANSKVTYEIDPDNGWMVTKG
SFSHLRNSVLSFFVKAVDGGIPVKHSLVSVYIHVLAPDALIPSFTQPQFSFTVPEDTPIG
FALVNGETGENNQDGVLVVDRDTGVIKLDKPLDHEVITAFHFKVTATDSVTSVDVEVKVL
DLNDNKPAFESNSYEATVMEGMPIGTMIIQVQALDPDSGANGQVTYSLFTIDSNTGWIST
LKELDHEMYPSYAFLVVASDLGETLALSSTSMVTVAVSDINDNPPRFLDERYCGSVRESD
PPGEVVAVLNTRDDDSSRVN
>Ok_XP_020364094
NDLRPLFSPTTYSVTIAESTPLRTSIAQVTATDADVGSNGEFYYFFEKMELFAVHPTSGV
VSLSGKLNMEEQNRYDLEIQAVDRGMKLYGNNGVSSTAKLFVHVERVNEHVPVMNVVTHV
PSWLDKNPVYAEIESLSIVAGDPMEQFEFAIKASDQVDWENFPYGYNLTLQAKDKGAPQK
FSSVRVVHIIVKKFEQESYEISLNEISPPGTIVKVVKITPEPDDAEYILTPSTDFRMNTL
TGVISTLGVKVRVSIEDANDNTPTFTQLSYEVFVNESVPMGWTVLAVSAVDGDSGENGYI
TYSIASPLPFKINQFSGILTTTQELDFESSSESYVFVVRASDWGSPYRRESEVNVTVHLE
NVNDNQPLFEKVACQGLVSRDFPINEVITTMSAIDIDELELVKYKILEGNERGFFDLNPD
SGVLTLRRSLSLKITATDGENFSDPMFVNISICRETRVAQKLAEKLLFSVNRQTPQFAFP
TDISVHEDLKVGSSVFKVNAYDGDTGFNGQMLYAISDGNTDSCFTIDMESGLISVFLPMD
REKRDRYLLNITIYDLGLPQKTAWHLLTVYVEDANDNAPQFLQYRTFIPENTAIGTDVIQ
VEATDKDLGPNGEIVYSVLTSTTQFGINSSNGIVYVAGQLDREFVSTFNLKIEARDRAEK
GNQKFSVTTLKISLEDVNDCPPAFIPSVYNTRALEDLPVGTVVAWLETQDPDLGLGGQVR
YSLVNDYNGKFEVDKASGAIRLTKELDYETQQFYNLTVRAKDKGRPVSLLSVTFVELEVV
DVNENLYTPYFSHFALTGSVKESARIGTTVLQVTARDDDDGRDGEIQYSIRDGSGLGRFA
IDEETGVIYTTDTLDRETKDSYWLTVYATDHGVVPQFAIMEVYIQVEDVNDNAPLTSDPV
YHPIVMENSPKDLSVIQIQAQDPDATGNPQNFFTINTRTKLDREQQAEHVLEVTVSDGGP
SPKHSTVWVIVHVLDENDNKPTFPEKVYQIKLPEYRAFAYDRDEGVNADLSYSIVDNEDG
KFFIDPKTAVVSSKQFTAGSYDILTVKAQINGRPQKSATARLHIEWIRKPLGRIPPIRRA
AYYNFTVMESDXVAEIVGVVSMQGGNTDSLFDIEKGVGHIIIAKPXDAEQRSFYNMTXEV
TDGTNSAATQVHITVDNNDNAPVFSQPTYDITISEDTPPETEVVQVLASDRDVKDQEFPY
RRNLARVLVDVEDVNDHVPVFTSALYEGSVYESAAVGSAVLQVTALDKDKGENAELLYTM
ESGNTGNTFRIEPVLGIISVARELDLSTIGYYVITIRVTDNGSPPLFATSVVRIAVTLSD
NAGPKFPQTEYQAEVTENVAVGTSVTTVSAMSQSTLTYDIRHGNSERTFRINQYSGVITT
QKPLDYETTASYNLIVQATNMAGMASNATMLIRVVDENDNPPVFQLLCYQGSISEAAPIN
SVVLNPDKTPLVIKATDADRNQNALLVYQIVEDTAKMFFTVDSGTGSIRTIANLDHEMFA
SFNFHVHVRDSGRPQLTADSPTEVTIQVIDTNDSPPRFTQDTYETVLLLPTYVGVEALQV
SAMDPDTELTYSVTDGNEHFTIQPSSGIITVKNNNFSKERFRFNVKVSDGKFSSTALVTV
LVRETLDSGLFFAHSLYSSSIQENNTNITKVAVVNAVGNRLNEPLKYTLLNPGTRFRIRS
TSGVIQTTGIPFDREEQEFYELVVEAGREHDRLRVARVMVRVQVEDINDNAPVFVGLPYY
AAVQVEAEPGSAIFRVTAVDRDKGINGEVSYYLKDDHGHFEIDRGGLRLKKSFESDLSNE
YQMVVYTKDGGYPPLSSTLEFPITVVNKAMPVFDKSFYAVSVNEDVAVHTPILGINATSP
EGQNIIYTIVEGDPSLQFDIGFDTGVIRVINSLDHEIAPSFRLTIRATDYLTGARAEVDV
DVTVNDFNDNPPVFEKMSYKAVLSETAMIGTPALQVVATDKDSEKNNIVRYQIFDHFHID
SSSGLILTARMLDHELVQRYDFIVRATDNGFPPLSSEVSVTVVVNDMNDNPPVFNQLLYE
AYVSELATRGYFVTCVQASDADSSDLEYSILSGNERMNFVMDGKTGIITLSGHRKMEPAY
SLNVSVSDGVFTSTAQVHVSILGANLYSPVFGLNAYDAEVRENAAVGTKVIATDADPGVF
GQITYSFVNDVGKDQFSVEANGQITTLEKLDREDPANIVLTVAAQDGGGRASYCTVRVSL
VDDNDNVPRFRATEYRASVKSDVGKGFLVTQIQAYDPDDGANSKVTYEIDPDNGWMVTKG
SFSHLRNSVLSFFVKAVDGGIPVKHSLVSVYIHVLASDALIPSFTQPQFSFTVPEDTPIG
FALVNGETGENNQDGVLVVDRDTGVIKLDKPLDHEVITAFHFKVTATDSVTSVDVEVKVL
DLNDNKPAFESNSYEATVMEGMPIGTIIIQVQALDPDSGANGQVTYSLFTIDSNTGWIST
LKELDHEMYPSYAFLVVASDLGETLALSSTSTVTVAVSDINDNPPRFLDERYLGSVRESD
PPGEVVAVLNTRDDDSSTVN
>Ok_XP_020357586
NDLRPLFSPTTYSVTIAESTPLRTSIAQVTATDADVGSNGEFYYFFEKMELFAVHPTSGV
VSLSGKLNIEEQNRYDLEIQAVDRGMKLYGNNGVSSTAKLFMHVERVNEHVPVMNVVTHV
PSWLDKDPVYAEIESVSIVAGDPGKQFEFAIKAFDQVDWENSPYGYNLTLQAKDKGVPQK
FSAVRVVHIMVKKFKQESYEISLFEISPPGMIVEVVKITPEPDDAEYILTPSADFRMNTL
TGVISTLRVKVRVSIEDANDNTPTFTQSSYEVFVNESVPMGSTILTVSAVDGDSGENGYI
TYSIASPLPFKINQFSGILTTTQELDFESSSESYVFVVRASDWGSPYRRESEVNVTVHLE
NVNDNQPLFEKVACQGVVSRDFPTDEVITTMSAIDIDELELVKYKILEGNERGFFDLNPD
SGVLTLRRSLSLKITATDGENFSDPMFVNISICRETRVAQKLAEKLLFSVNRQTPQFAFP
ADISVCEDLKVGSSVFKVNAYDGDTGFNGLILYSISDGNTDSCFTIDMESGLISVFLPMD
REKRDRYLLNITIYDLGLPQKTAWSLLTIYIEDANDNTPQFLQYRTVIPENMAIGTDVIQ
VEATDKDLGPNGEIVYSVLTSTTQFGINSSNGIVYVAGQLDREFVSNFNLKIEARDRAEK
GNQKFSVTTLKISLDDVNDCPPVFIPSVYNTRALEDLPVGTVVAWLETQDPDLGLGGQVR
YSLANDYNGKFEVDKASGAIRLTKELDYETQQFYNLTVRAKDKGRPVSLLSVTFVELEVV
DVNENLYTPYFSHFALTGSVKESARIGTTVLQVTARDDDNGRDGAIQYSIRDGSGLGRFA
IDEETGVIYTTDTLDRETKDSYWLTVYAADHGVVPQFAIMEVYIQVEDVNDNAPLTSDPV
YHPVIMENSPKDLSVIQIQAQDPDATGNPQNFFTINTRTKLDREQQAEHVLEVTVSDGGP
SPKHSTLWVIVHVLDENDNKPTFPEKVYQIKLPEYRAFAYDRDEGVNADLSYSIVDNEDG
KFFIDPKTAVVSSKQFTAGSYDILTIKATDNGRPQKWSTARLHIEWIRKPASVAPLLFDE
QYYNFTVMESDKVAEIVGVVSMQGGNTDSLFDIEKGVGTIIIAKPLDAEQRSFYNMTVEV
TDGTNSAATQVHITVDNNDNAPVFSQPTYDITISEDTPPETEVVQVLASDRDVKDQEFPY
RRNLARVLVDVEDVNDHVPVFTSALYEGSVYESAAVGSAVLQVTALDKDKGENAELLYTM
ESGNTGNTFWIEPVLGIISVARELDLSTIGYYIITVRVTDNGSPPLSANSVVRIAITLSD
NAGPKFSQTEYQAEVTENVAVGTSVTTVSAMSQSTLTYDIRHGNSERTFRINQYSGVITT
QKPLDYETTASYNLIVQATNMAGMASNATLLIRVLDENDNPPVFQLLRYQGSISEAAPIN
SVVLNPDNTPLVIKATDADRNQNALLVYQIVEDTAKMFFKVDSGTGSIRTIANLDHESFA
SFNFHVHVRDSGRPQLTADSPTEVTIQVIDTNDSPPVFTQNAYETVLLLPTYVGVEALQV
SATDPDTELTYSLTDGNEHFAIQLSSGIIIVKNNNFSKERFRFNVKVSDGKFSSTTLVTV
LVRETLDSGLFFAHSLYSSSIQENNTNITKVAVVNAVGNRLNEPLKYTLLNPGTCFRIRP
TSGVIQTTGIPFDREEQEFYELVVEAGREHDRLRVARVIVRVQVEDINDNAPAFLGLPYY
AAVQVEAKPGVPIFRVTAMDRDKGINGEVSYYLKDDHGHFEIDRGGLRLKEAFESDLSNE
YQMVVYAKDGGYPPLSSAVEFPITVVNKAMPVFDKSFYAVAVNEDVAVHTPILGINATSP
EGQNIIYTIVEGDPSLQFDIGFDTGVIKVINSLDYEIASSFRLTVRATDYLTGARAEVDV
DVTVNDVNNNPPVFEKTSYKAVLSETAMIGTPALQVVATDQDSEKNNIVHYQIFDHFHID
SSSGLILTARMLDHELVQRYDFIVRATDNGFPPLSSEVSVVLVVNDMNDNPPVFNQLLYE
AYVSELAPRGHFVTCIQGSDADSSDLEYSILSGNERMNFVMDGKTGIIMLSGHRKMEPAY
SLNVSVSDGVFTSTAQVHVRVLGANLYSPVFELNPYEAEVRENAAIGTKVIATDADPGVF
GQITYSFINDVGKDQFSVDANGQITTLEKLDREDPANIFLMVAAQDGGGRASYCTVRVSL
VDDNDNVPRFRAVEYRASVKSDVGKGFLVTQIQAYDPDDGANSKVTYEIDPDNGWMVTKG
SFSHLRNSVLSFFVKAVDGGIPVKHSLVSVYIHVLAPDALIPSFTQPQFSFTVPEDTPIG
FALVNGETGENNLEGVLVVDRDTGVIKLDKPLDHEVITSFHFKVTATDSVTSVDIEVKVL
DVNDNKPAFESNSYEATVMEGMPIGTIIIQVQALDPDSGANGQVTYNLFTIDSNTGWIST
LKELDHEMCPSYTFLVVASDLGEALTLSSTSTLTLAVSDINDNPPSFLDERYLGSVRESD
PPGEVVAVLNTRDDDSSAVN
>Ss_XP_014018822
NDLRPLFSPTTYSVTIAESTPLRTSIAQVTATDADVGSNGEFYYFFEKMELFAVHPTSGV
VSLSGKLNIEEQNRYDLEIQAVDRGMKLYGNNGVSSTAKLFVHVERVNDHVPFMNVVTHV
PSWLDKDPVYAEIESVSIVAGDPLKQFEFAIKASDQVDWENFPYGYNLTLQAKDKGAPQK
FSAVRVVHIMVKKFKQESYEISLNEISPPGMIVEVVKITPEPDDAEYILTPSADFRMNTL
TGVISTLRVKVRVSIEDANDNTPTFTQSSYEVFVNESVPMGSTVLTVSAVDGDSGENGYI
TFSIASPLPFKINQFSGILTTTQELDFESSSESYVFVVRASDWGSPYRRESEVNVTVHLE
NVNDNQPLFEKVACQGVVSRDFPTDEVITTMSAIDIDELELVKYKILEGNERGFFDLNPD
SGVLNLRRSLSLKITATDGENFSDPMFVNISICRETRVAQKLAEKLLFSVNRQTPQFAFP
ADISVREDLKVGSSVFKVNAYDGDTGFNGQILYAISGGNTDSCFTIDMESGLISVFLPMD
REKRDRYLLNITIYDLGLPQKTAWHLLTVYIEDANDNAPQFLQYRTVIPENMAIGTDVIQ
VEATDKDLGPNGEIVYSVLTSTTQFGINSSNGIVYVAGQLDREFVSNFNLKIEARDRAEK
GNQKFSVTTLKISLEDVNDCPPAFIPSVYNTRALEDLPVGTVVAWLETQDLDLGLGGQVR
YSLANDYNGKFEVDKASGAIRLIKELDYETQQFYNLTVRAKDKGRPVSLLSVTFVELEVI
DVNENLYTPYFSHFALTGSVKESARIGTTVLQVTARDDDNGRDGEIQYSIRDGSGLGRFA
IDEETGVIYTTDTLDRETKDSYWLTVYATDHGVVPQFAIMEVYIQVEDVNDNAPLTSDPV
YHPVVMENSPKDLSVIQIQAQDPDATGNPQNFFTINTRTKLDREQQAEHVLEVTVSDGGP
SPKHSTVWVIVHVLDENDNKPSFPEKVYQIKLPEYRAFAYDRDEGVNADLSYSIVDNEDG
KFFIDPKTAVVSSKQFTAGSYDILTIKATDNGRPQKWSTARLHIEWIRRPASVAPLLFDE
QYYNFTIMESDKVAEIVGVVSMQGGNTDSLFDIEKGVGTIIIAKPLDAEQRSFYNMTVEV
TDGTNSAATQVHITVDNNDNAPVFSQPTYDITISEDTPPETEVVQVLASDRDVKDQEFPY
RRNLARVLVDVEDVNDHVPVFTSALYEGSVYESAAVGSAVLQVTALDKDKGENAELLYTM
ESGNTGNTFRIEPVLGIISVARELDLSTIGHYIITVRVTDNGSPPLSANSVVRIAITLSD
NAGPKFPQTEYQAEVTENVAVGTSVTTVSAMSQSTLTYDIRHANSERTFRINQYSGVITT
QKPLDYETTASYNLIVQATNMAGMASNATLLIRVVDENDNPPVFQLLRYQGSISEAAPIN
SVVLNPDNTPLVIKATDADRNQNALLVYQIVEDTAKMFFKVDSGTGSIRTIANLDHETFA
SFNFHVHVRDSGRPQLTADSPTEVTIQVIDTNDSPPVFTQNAFETVLLLPTYVGVEALQV
SATDPDTELTYSLTDGNEHFAIQPSSGIITAKNNNFSKERFRFNVKVSDGKFSSTALVTV
LVREMLDSGLFFAHSLYSSSIQENNTNITKVAVVNAVGNRLNEPLKYTLLNPGTRFRIRP
TSGVIQTTGVPFDREEQEFYELVVEAGREHDRLRVARVMVRVQVEDINDNAPVFLGLPYY
AAVQVEAKPGAPIFRVTAMDRDKGINGEVSYYLKDDHGHFEIDRGGLRLKEAFESDLSNE
YQMVVYAKDGGYPPLSSAVEFPITVVNKAMPVFDKSFYAVTVNEEVAVHTPILGINATSP
EGQNIIYTIVEGDPSLQFDIGFDTGVISVINSLDYEIASSFRLTVRATDYLTGARAEVDV
DVTVNDVNDNPPVFEKTSYNAVLSETAMIGTPALQVVATDQDSEKNNIVHYQIFDHFHID
SSSGLILTARMLDHELVQRYDFIVRATDNGFPPLSSEVSVVLVVNDMNDNPPVFNQLLYE
AYVSELAPRGHFVTCIQASDADSSDLEYSILSGNERMNFVMDGKTGIITLSGPRKMEPAY
SLNVSVSDGVFTSTAQVHVRVLGANLYSPVFELNAYEAEVRENAAIGTKVIATDVDPGVF
GQITYSFINDVGKDQFSVDANGQITTLEKLDREDPANIFLKVAAQDGGGRASYRTVRVSL
VDDNDNVPRFRAVEYRASVKSDVGKGFLVTQIQAYDPDDGANSKVTYEIDPDNGWMVTKG
SFSHLRNSVLSFFVKAVDGGIPVKHSLVSVYIHVLAPDALIPSFTQPQFSFTVPEDTPIG
FALVNGETGENNLEGVLVVDRDTGVIKLDKPLDHEVITSFHFKVTATDSVTSVDVEVKVL
DLNDNKPAFESNSYEATVMEGMPIGTMTIQVQALDPDSGANGQVTYNLFTIDSNTGWIST
LKELDHEMCPSYTFLVVASDLGEALTLSSTSTVTLAVSDINDNSPSFLDERYLGSVRESD
PPGEVVAVLNTRDDDSSAVN
>Cm_chondrichthyes_FAT3_SINCAMP00000021883_unlinked MTNR1B
NDLRPLFSPTTYSVTIPENTPLRTSIAQVTATDADIGSNGEFYYYFDRVDLFAVHPTSGV
VSLSGRLNYGERNRYDLEVLAVDRGMKLYGNNGVSSTAKLVIHIELINEYAPTVSVVTHI
PSLMDSDPTYAEIDSVSIVAGDPLEQFEYWIKAGNPVDWGNFPHGYNLTLQAIDKGSPQK
FSAVKLVHIGNYTFEEDVYEVELNEFSPPGVTVIAVKLKPEPQNVEYKLSETDDFHINPK
TGLITTIKARVIINIEDANDHTPEFHHGSYEIFINESLPIGSRVLTVSATDDDEGENGYV
TYSIASPLPFTINQFTGDISTSKELDYESSSQSYMFFVRASDWGSPYRRESEVNVTIYVE
NVNDNKPLFEKVACHGVISHEFPVGGQITAVSAIDVDELELVKYRIISGNELGFFELNSK
SGVLLLKKAFALHIMATDGENYADPMFVNISLCRETGAAQNLTEKLLYSINRQAPQFSFP
SEISVKEDLPVGSSILKICAFDADSGFNGKVVYAISEGNIDSCFNLEMETGWITILMPMD
RESADEYVLNITIYDLGSPPKSAWKLMTIHIQDANDNKPQFLQYFVAIPEDTEIGTEVVQ
VEATDNDLGCNSEIIYTILTDTQLFAINMTTGIVYVTGLLDRELVTNYTLKIEARDKAEN
DPQLYSVVGLKIVLEDINDNPPQFIPSNYVVKVLEDLPVGIVITWIESHDPDRGLGGQVR
YSLGNDYNGKFEIDKISGAVRLSKELDFEKQQFYNMTIRAKDKGRPVSLSSVSFIEVEVV
DVNENLYTPQFSRFAMMASVKENSPIGTSILQLTAYDDDSGRDGVIQYSIRDGSGLGRFT
VEEDTGVINTADVLDRETTASYWLTVYATDRGVVPLFSSIEIYIEVEDENDNAPMSYEPI
YHPSVLENSPKDVPVMQVQAYDPDSSSNPQNFFVINSKTKLDREQQAEHFLEVTVTDGSS
SPKQSTVWVVVHVLDENDNKPLFPQKVYQIKLPEYRVFAFDKDKGANAEISYSIVDNDDG
KFFIDPKTGMVSSKQFSAGNYDILTIKAVDNGRPQKSSSARLHIEWIKKPRSEIPLSFDE
PFYNFTVMENDRVTEIVGVVTVQGGNYGNSFDIEKGMGTIVIAKTLDAEQRSTYNMTIEV
TEGTNSATTQVHIKIDNNDNGPVFSKPNYEITISEDTFVGAEILHVKATDKDVRDQEFPY
RRNLVRVVINVDDFNDHTPYFTNTVYDGSVFESAAQGSAVLQVTALDRDKGKNAELIYTI
ETGNPENTFKIEPVLGIISVSKELDLSSLGQYIMTVKATDQGSPPLSATAIVHVSVTISD
NAHPKFLQKQYAKEVNENVSAGSSVIMISAVSQSTVVYEIKDGNIESIFTINPYSGVISV
HKPLDYEHIPSYNLIVQATNMAGMSSNTSVNIHVVDENDNPPVFMHSQYTGSISEAAPTN
SVVLISGNTPLVIRATDADQNQNALLVYQIVESTAKKYFSVDSSTGAIRTTATLDHETIP
VFHFQVQVRDSGTPQLTAESLAEVTIHVTDTNDSPPKFSQDVYESVLLLPTYTGVEVLTV
SATDPDSELTYTLTDGNNYFLISLKSGVITVKNHTLDEELYELTVCVSDGKFSSSALVKI
TVKDAIDSGLHFTQTFYTASIWENSTESKKVAVVNAVGNQLNEPLKYRILNPGDKFRIKS
TSGIVQTMPVSFDREEREVYELVVEASREHDPWHVARVVIRVQVEDINDNPPAFVGLPYY
AAVQVDAEPGAIIYHVTAMDRDKGKNGEITYFLGDGPDHFEIDQGIVTLKEPFESDLSNE
YDIDVIAKDGGAPALSTCVKLPITVVNKAMPVFAKPFYLAAVNEDIQPHTPIISINATSP
EGQSLIYTITDGNPLNQFNINFDTGVISVISPLDYEAESSYKMTIRATDSLTGARAEVTV
DIVVHDVNDNPPVFEKTMYKVMLSESSMIGTPVLQAVALDADSENSQVVHYQIVDYFHID
STSGLILTSRMLDYELIQQYNFIVRATDNGIPPLSSDVPVTVYVSDMNDNPPVFNQLLYE
SYVNELAPRGHFVTCVQAFDADNSDLEYSILSGNDHMNFVMDSRRGIITLSNHRKVDSAY
NLNVSVSDGIFTSTAQVHIRVFSANLYSPVFSRSIYLVELRENCAIGTTVTATDGDSEEY
GQIIFSIVNDIARDRFSIDTEGNIITTEKSNREIPLEIDITVMAVDGGGRATFCTVRVKL
MDENDNAPQFSASEYRTSFKADVNKGTLIIQVAASDPDQGTNARVMFDIDHETGWIVTKE
SFSHLKDTILSFFVKASDGGVPVRSALVPVYLHILPPETVFPTFLQHEYSFLLPEDVPIG
FSTVNGGLPKNNQEGVFVIDSHSGVIKLEKKLDYEATHLYEFLVTATDIVLTAGVKVEVM
DLNDNKPIFDANPYEAVVMEGMPIRTKVIQVKATDEDSGANGQVIYSLFTIDSKNGWITT
LKDLDHEKQPMYTFAVVAFDLGKTVSLSSTAIVQVAVTDINDNAPNFVTEVYRASVRESD
SPGEVVAVLSTQDDDTSEIN
>Dr_teleost_FAT2__ENSDARG00000018923_chr14_MTNR1D
NDLKPLFYPASYHVVIKEDTPIKSSLVRVSATDADIGSNAEFYYSFTRSHPFAVDPFTGT
VTLVKRLDTSQRDRYDLTVLAEDRKKKISGVQKFGNVATVVVKIQKVEKNFTLISPTTAE
SLLTIDDKISVNTASLSIVKGDPLNCFGFQLVSTKFIDWSQNPLGLNISLQAKDRSNPPL
LTPIKTVHIPPPRFEQELYYVTLSEFSPPKTHVVRVSVGLSLKNTTFSIQENPDFKISAK
TGVIVTAVTRVIVDITDENDNAPSFTLPSYQASLPENVRIGTSVLSVSAIDVDKDNNGFV
TYAIANPVPFSIDPLTGVISTSQEFDYELMKRWYHLRIWASDSGNPFNRVSECTVTITMT
NVNDNVPVFERVACNASIPRDFAVGEIIAEISALDLDELQQIVYRIESGNDDGLFSIDPV
SGIIKLAKAITLKITATDGTYIADPNTVTVSICEETGITRQLTEKLIHIINQHSPKFSTP
GSIDIREDFALNRSVLQFNATDNDSGFNGKLVYSISSGNEDGCFTIDVNAGDLKVICALD
REQKEFYILNITVYDLGYPQTSTWKLLAVNILDANDNPPLFSQYVVTIPENTEVDKSIFK
VNAVDFDLDNNGAFKYSLFTFTDLFQIEEDTGVVKVIGPLDRETFRRYDLTIEARDQAKP
DPQLFSFTDVVVVLEDINDNPPKFVPTVYKIKVPEDVPPGTVLLWVESFDLDLESGGVIS
YNLKNSESGTFFLDTSTGSLTLERELDFEKRQFYNLTVRAVDHGKPRSLSSSCFIEIEVL
DVNENLNRPLFGEMVHTAAVMEDAKIGTSVLTLTAVDNDLGRDGVVRYYIHDGSGLGVFT
VDEETGVIQTAGLLDREVVPHYWLTVYAKDLGTIPLVSWTEVYIEVWDINDNPPELSQPV
YFGSVQENLPKDKSVLKVSATDMDKSSSQRIYFTIDSKTSLDREQKAEHIIEVMVSDKGE
PPLSSTATVVIEVLDENDNSPQFSHKLFQIKLPEYRMVARDDDVGPNGMITYSLEDNNEG
RFDIHPDTGVVTAGQFVRGNYSILTIQATDQGNPPRMSKSRLHVEWLPQPPSSDVLAFDE
PPFNYVVMETDPVTDMVGIIRTEGGDEEQDFYIEKNTGSIVKARRLNAGKKSHYNLTVRV
TDGFQTITTQAYIQVDINEHRPMFLKSLYEVRVPEDTSPWKEILHISAHDADVRDDKIPI
KKNFAKVVVHVEDCNDHIPSFLDTHYEGIISNLALTGTEVLRVKALDKDTGSNADIVYSF
HSGNVDGAFKIDQGTGSIRVSDALDRLPQEHYHLTVKATDQGFPQRSALCPVTITIKLSE
FTPPRFSSKEYITEISEAMPPGSPVLSVSARCPSSVLYRINEGDPNGTFHININSGLLSV
KNALDFEQHSSYHLQISATNTAGISSDAVVFVYVIDANDNAPVFHQDVYYGQISESAPVN
SMVTGENNTPLVIKASDADKDTNALLVYQILEPAAHEVFKIDPSMGTISLKSLIDFEATP
EFFFSVQVWDSGEPSLSASKPCKVIIRVLDFNDCPPKFVLPVYEIALTWPVFQDMKVIQV
TAHDADSAVTYMILENSNAFKIDQSTGVISVNDSSELQSHNELKITAFDGLYKDTTVVKL
NITNATKSSLKFEDRAHVATVLENSTSVKILVVLRATGTYLNEPLQFTVLNPHGKFAVIP
SSGVLHTTGVPFDREEQDVYDVAVEVRDFRSPPRVDVTHVKVYIDDVNDNVPEILNLPKT
LLISDETEPGDVLFQVLATDNDFGENGSIIFSLEDDFGLFRIDLGDVSLQRPLDFESMNK
YVLTVLVSDDGQPSLSAIGTIYIQVQNRSHPIFQSMYYPLKLPENITPFTTILHVQARNP
EGYRLIYNLEEDNASRLFNIDFKTGVLSVTDFLDFESETKHILTVRATDSVSGTFAEAKV
EIDVEDINDNAPVFQNLSYVADVFEGLPIGTSVLQVSAVDRDADKNAEATYQLIHFFEID
PLSGVLVTTQVLDYESTQQFTLKVKATDKGVPPLSGEAHIIVNVIDVNDNPPDFSEPSYR
ASLDEMATCGNIVIKVQASDPDSKDLQYKILSGNEGRYFAINESSGLISFSNVCKLDPFY
NLTVAVSDGVFQKTAPVNIDMTNGNKYSPYFTQNIYEADLAENAEVGTRVIAIDPDDGPY
GSVDYTIINKLADEKFAINEDGQIVTSQPLDRENPSQIAIKIMAKDGGGRVGFCTVKIIL
TDENDNVPQFKASEYDISIQSTVNKGSPVIQIMAYDADEGKNADVTYEVNPFTGVVSVKE
SLVGLENKIFNFKVKARDGGFPFYNSSVPVQVKVVPPEIILPRFTEPLYSFSASEDLPIG
YSLVNGNTLDSNKELSFAIDKDGGTVVLQNNIDHEKTKMYKIDVIAQNVASLVSVHIEVQ
DVNDNKPMFEADTYKAFLAENLPSGTTVIQVTANDADANINGEVSYTLFAIDSQTGWITT
LKEADSETKQLHRFFVVATDHGDALKQSASVLVEVTLTDENDNPPQFTEELYQGSILENS
RPGENIVTLTTADKDVSAEN
>Om_XP_021438968
NDLKPLFYPASYNVVIREDAPLKSSVVRVSATDADIGCNAEFYYSFSRAHPFAVDPFTGV
ISLVKRLNHSRAETYDLTVLAEDRTKKISGVQKFGNVARVKVTIEKVSSTAPIIKPLPVV
LAQKDEDEKITQVESVSIVGGDPQRYFGFQVVSTKRMNWSQSPSGLNLSLQAKDKSNPPL
VSPVSEIHIPPYSFLEDTYILTLSEFSPPKTHVVRVSVNPAYLNVRFHIKSNSDFKINPK
TGIIVTAETHVVVEITDENDNAPTFTKPSYQTTLPENVPIGSSVLTVSAIDDDRERNGFV
TYAIANPSPFTIDPISGVISTSEDLDYELMKRWYHLRVWASDSGSPFSHVSECAVTITMS
NVNDNTPLFEQVGCNATIPVDLAVGEPIAELSAVDLDELQQLRYVIESGNDQKLFDIDAV
SGVITLIRQIRLRITATDGKHTSDPSVVTVTICQETGIFKQLTDKLIHIINRYSPKFGIP
STIDIREDFPLNSTILYFKATDNDTGFNSKLVYAISSGNEDGCFSIGIFSGELQLVCPLD
QETKEFYILNVTVYDLGSPQTSAWKFLAVNLLDVNDNRPVFDQYVVHIPENTEVDTRIFQ
VHAIDLDSEDNGNILYSMLTLTDLFKINELTGEVKVSDRLDREAFPRHNLKIEARDQSKT
DPQLFSMTDLVVVLEDINDNPPKFVPKIYNIKVPEDVPMGTVLLWVESYDLDLGSAGQVS
YNLKNSENGAFFLDASTGSLTLEKELDFERRQSYNLTVRAVDHGLPRSLSSSCFIEVEVL
DVNENLNKPVFSMFVYEASVMEDAPVGTSVFTLTAADRDLGRDGVVRYHIHDGSGLGVFM
IDEETGVIRTAETLDREAVPHYWLSVYAKDLGTIPLVTWTDIFLEVLDINDNPPQMSQPV
YFGSVLENMPKDKSVVQVTATDVDSSSSQRMYFTINTKTSLDRELKSEHSVEVIVSDNGA
PPLRSTSTVIIQVLDENDNRPQFNHKLFQVKLPECRMVAQDDDEGPNAEVTFSLQDNQNE
KFEIHPDTGVVTAGDFTAGNYSILTIKAKDHGSPVRSSTVRLDVEWISKPPTSDPLTFDE
PHFTFAVMETDPVTHMVGIILTEGGDEEQDFDIERNTGSIVIARPLDAGKKSNYNLTVQV
TDGHQVATTQAYIRVDMNEHRPMFMKSTYEVSVPEDTSPWKDILHISAQDRDVRDQEIPV
KRNFVKAVVYVEDCNDHSPAFLAAGYEGTITNLAAAGTEVLRVKALDKDTGSNAQIIYSL
HSGNVDNTFDIDGELGSITIAKPLDSLPQEQFHLTVKATDQGFPLHSDLCSVSITVLLSD
RTPPRFPSDEFFSEVSEASPLGTPVITVSAASPSAVHYSIKDGDPNGTFHINAESGVLSV
QASLNFERCFSYKLKVRASTSAGASSDTVVYVYVIDENDNPPVFLQEKFHGQISESAHIN
SMVMGESNTPLVLRASDADRDSNSLLVFQILELEAMKVFKIDPSMGTLSVISEVDFEETP
EFHFSIQVRDSGEPSLYAAEPARVTIRVLDFNDCSPKFSRPVYESSIIFPLVREMEVVRV
TAEDADSAVSYSITEGNNAFLIHPSTGAISVNNVSEFNSFYQLLVKASDGLYKDLATVKV
NVTNITAGGLQFEQGLYAATIVENTMSVNMLVVLRASGSYLNEPLIYSVLNPMGRFSIVP
TSGVLETTGVPFDREEQDVYDIVVEVRDMRSPPRRAITHVNVYIVDVNDNPPRFLNLPHS
MMISEDTDLGDVIFQVMASDSDLGENGSIMYLLEEDFDLFRIDPGDVSLQRPIDFEATNK
YTLTVLATDEGSPSLTTSAELSITVRNRTNPIFQTLLYPLKVPENISPFTTILHVQARNP
EGYRLIYNLEEENASKNFHIDFKTGVLSVTDLLDYESQTMHLLTVRATDSVTGSFSEAAV
EIEVEDVNDNAPIFSKLTDTVDIPEGLPIGTSVLQISATDRDSGRNRDLTFHILDFFKID
PQSGLIVTTQVLDYEKTKHFQLKIKAIDNGTNPLSSDAYVIVNVTDVNDNPPNFSKTHYQ
ATLDEMAKCGHIVIKIQASDPDTRDLQYKILSGNEGRYFAINESSGIISFSNVCKVDPFY
NLTVAVSDGVFQNTAPVNIDMMNTNKHSPYFNKNIYEAELAENAEAGTRVIAIDPDDGPY
GSVDYTIINKLADEKFSIDKNGQIITSQPLDRENPSQIAIKVMAKDGGGKVAFCTVKIIL
TDENDNAPQFKATEYQVSIQSTVNKGSPVIQIVAYDADDGKNADVTYEINPFTGIVSVKE
SLIGQENKIFNFKVKARDSGLPFFNSTVPVQVKVVPPEVPLPKFSEPLYTFSAAEDISMG
YSLVNGNTVESNRDRVFALDKESGTLLVQKSIDHEKTKWYQIDVIAQDVASLVSVSIQVQ
DVNDNVPVFEANPYKAFLAENMPPGTTVIQVTANDPDQDTNGQVTYTLFSIDSESGWITT
LRETDCEMTQHYSFTVVATDHGGEVKLSSSVLVEVTVTDENDNPPRFKEDVYHGSVMENT
RPGDVIMSLTTVDMDVTKEN
>Ss_XP_014068735
NDLKPLFYPASYNVVIREDAPLKSSVVRVSATDADIGCNAEFYYSFSRAHPFAVDPFSGT
IILVKRLNHSRAETYDLTVLAEDRTKKISGVQKFGNVARVKVTIEKVSSTAPIIKPLPVV
LAQKDEDEKITPVESVSIVGGDPQRYFGFQVVSTKRMNWSQSPSGLNLSLQAKDKSSPPL
VSPVSEIHIPPYSFLEDTYILTLSEFSPPKTHVVRVSVSPAYLNVRYHIKSNSDFKINPK
TGIIVTAETHIVVEITDENDNAPIFTKPSYQATLPENVPIGSSVLSVSAIDDDRDRNGFV
TYAIANPSPFTIDPISGVISTSEDLDYELMKRWYHLRVWASDSGSPFSYVSECAVTITMS
NVNDNTPLFEQVGCNATIPVDLAVREPIAELSAVDLDELQQLRYVIESGNDQKLFDIDAV
SGVIKLIKQIRLRITATDGKHTSDPSVVTVTVCQETGIFKQLTDKLIHIINRHSPKFGIP
STIDIREDFPLNSTILYFKATDNDTGFNSKLVYAISSGNEDGCFSIGIFSGELQLVCPLD
RETKEFYILNVTVYDLGSPQTSAWKFLAVNLLDVNDNRPVFDQYVVHIPENMEVDTRIFQ
VHATDLDSEDNGNILYSMLTLTDLFKINELTGEVKVSDRLDREALPRHNLKIEARDQSKT
DPQLFSMTDLVVMLEDINDNPPKFVPKIYNIKVPEDVPLGTVLLWVESYDLDLGSAGQIS
YNLKNSENGAFFLDASTGSLTLEKELDFERRQSYNLTVRAVDHGLPRSLSSSCFIEVEVL
DVNENLNKPVFSMFVYAASVMEDAPVGTSVLMLTAADMDLGRDGVVRYHIHDGSGLGVFM
IDEETGVIRTAETLDREAVPHYWLSVYAKDLGTIPLVTWTDIFVEVLDINDNPPQLSQPV
YFGSVLENMPKDKSVLQVTATDVDSSSSPRTYFTIEPKTSLDRELKSEHSVEVIVSDNGA
PPLRSTSTVIIQVLDENDNRPQFNHKLFQVKLPECRMVAQDDDEGPNAEVTFSLQDNQNE
RFEIHPDTGVVTAGDFTAGNYSILTIKAKDHGSPVRSSTVRLDVEWIPKPPTSDLLTFDE
PHFTFAVMETDPVTHMVGIILTEGGDEEQDFDIERNTGSIVIGRPLDAGRKSNYNLTVQV
TDGHQFATTQAYIRVDMNEHRPMFMKSIYEVRVPEDTSPWKDILHISAQDRDVRDQEIPV
KRNFVKAVVYVEDCNDHSPAFMAAGYEGTITNLAAAGTEVLRVKALDKDMGSNAQIIYSL
HSGNVNNTFDIDGELGSITITKSLDSLPQEQFHLTVKATDQGFPQHSDLCSVSITVLLSD
RTPPRFPSDEFFSEVSEASSLGTPVIAVSAASPSAVHYSIKDGDPNGTFHINANSGVLSV
QTSLNFEKCFSYRLKVRASTSAGASSDTVVYVYVIDENDNPPVFLQEKFHGQISESAHIN
SMVMGESNTPLVIRASDADRDSNSLLVFQILEPEAMKVFKIDPSMGTLSVISEVDFEETP
EFHFSIQVRDSGEPSLYAAEPARVTIRVLDFNDCSPKFSRPVYESSIIFPPVREMEVVRV
TAQDADSVVSYSITEGNNAFLIHPFTGAISVNNVSEFKSFYQLLVKASDGLYKDLATVKI
NVTNITASGLQFEQGLYAATIVENSMSVKMLVVLRASGSYLNEPLIYSVLNPMGRFSIVP
TSGVLETTGVPFDREEQDVYDIVVEVRDMRSPPRRAITHVNIYIVDINDNPPRFLNLPHS
MMISEDTDLGDVIFQVMASDSDLGENGSIMYLLQEDFDLFRIDPGDVSLQRPIDFDATNK
YTLTVLATDEGSPSLTTSAELSITVRNRTNPIFQTLLYPLKVPENISPFTTILHVQARNP
EGYRLIYNLEEENASTNFHIDFKTGVLTVTDSLDYESQTMHLLTVRATDSVTGSFSEAAV
EIEVEDVNDNAPVFSKLTDTVDIPEGLPIGTSVLQISATDRDSGRNKDITFHILDFFEID
PQSGLIITTQVLDYEKTKHFQLKIKAIDNGTNLLSSEAYVIVNVTDVNDNPPNFSKTHYQ
ATLDEMAKCGHIVIKIQASDPDTRDLQYKILSGNEERYFAINESSGIISFSNVCKVDPFY
NLTVAVSDGVFQNTAPVNIDMMNTNKHSPYFNKNIYEAELAENAEAGTRVIAIDPDDGPY
GSVDYTIINKLADEKFSIDKNGQIITSQPLDRENPSQIAIKVMAKDGGGKVAFCTVKIIL
TDENDNAPQFKASEYQVSIQSTVNKGSPVIQIMAYDADDGKNADVTYEINPFTGIVSVKE
SLIGQENKIFNFKVKARDGGLPFYNSTVPVQVKVVPPEVPLPKFSEPLYTFSAAEDISMG
YSLVNGNTVESNRDRVFALDKESGTLLVQKSIDHEKTKWYQIDVIAQDVASLVSVSIQVQ
DVNDNVPVFEANPYKAFLAENMPPGTTVIQVTANDPDQDTNGQVTYTLFSIDSESGWITT
LRETDCETIQHYSFTVVATDHGGEVKLSSSVLVEVTVTDENDNPPRFKEDVYHGSVMENT
RPGEVIMSLTTIDMDVTKEN
>Om_XP_021417524
NDLKPLFYPASYNVVIREDAPLKSSVVRVSATDADIGCNAEFYYSFTRAHPFAVDPFSGT
ISLVKRLNHSRAETYDLTVLAEDRTKKISGVKKFGNVASVTVTIEKVSSTGPTIKPLPVV
LAQKDEEEKITQVESVSIVGGDPQRYFGFQVVSTKRINWSQSPSGFNLSLQAKDKSSPPL
VSPVSEIHIPAYSFLEDTYILTLSEFSPPKTHVVRVSVSPAHLNVTFHIKSNSDFKINPK
TGILVTAETHIVVEITDENDNAPTFTKPSYQTTLPENVPIGSSVLTVSAIDVDRGRNGFV
TYAIANPSPFTIDPISGVISTSEDLDYELMKRWYHLRVWASDSGSPFSHVSECAVTITMS
NVNDNTPLFEQVGCNATIPVDLAVGEPITELSAVDLDELQQLRYVIESGNDQKLFDIDAV
SGVITLIRQIRLRITATDGKHTSDPSVVTVTVCQETGIFKRLTDKLIHIINRHSPKFGIP
STIDIREDFPLNSTILHFKASDNDTGFNSKLVYAISSGNEDGCFSIGIWSGELKLVCPLD
RETKEFYILNVTVYDLGSPQTSAWKFLAVNLLDVNDNRPVFNQYVVHIPENTEVDATIFQ
MHATDLDSEGNGNILYSMLTLTNLFKINELTGKVKVSGRLDREAFPRHDLKVEARDQSKK
DPQLFSLTDLVVVLEDINDNPPKFVPKIYNIKVPEDFPLGTVLLWVESYDLDLGSAGQVS
YNLKNSENGTFFLDALTGSLTLEKELDFEMRQSYNLTVQAVDHGLPRSLSSSCFIEVEVL
DVNENLNKPVFSMFVYEASVMEDAPVGTSVFTLTAADRDQGKDGVVRYHIHNGSGLGVFM
IDEETGVIRTAETLDREAVPHYWLSVYAKDLGTIPLVTWTDIFVEVLDINDNPPQMSQPV
YFGSVLENMPKDKSVVQVTATDVDSSSSPRRYFTINTKTSLDREQQSEHSIEVIVSDNGA
PPLRSTSTVIIQVLDENDNRPQFNHKLFQVKLPECRMVAQDDDEGPNAEVTFSLQDNQDE
RFDIHPDTGVVTAGDFTAGNYSILTIKAEDHGSPVRSSTVRLDVEWISKPPTSDPLTFDE
PHFTFAVMETDPVTHMVGIILTEGGDEEQDFDIERNTGSIVIARPLDAGKKSNYNLTVQV
TDGHQVATTQAYIQVDMNEHRPKFMTSIYEVRVPEDTSPRKDILHISAQDQDVRDQEIPV
KRNFVKAVVYVEDCNDHSPAFLAAGYEGTITDLAAAGTEVLRVKALDKDMGSNAQIIYSL
HSGNVDNTFDIDGELGSITIAKTLDSLPQEQFHLTVKATDQGFPQHSDLCSVSITVLLSD
RTPPRFPSDEFFSEVSEASPLGTPVITVLAASPSAVHYSIKDGDPNGTFHINAESGVLSV
QARLNFERCFSYRLKVRASTSAGASSDTVVYVYVIDENDNPPVFLQEKFHGQISESAHIN
SMVMGESNTPLVIRASDADRDSNSLLVFHILEPEAMKVFKIDPSMGTLSVISEVDFEETP
EFSFSIQVRDSGEPSLCAAEPARVTIRVLDINDCSPKFSRPVYESSIIFPPVREMEVVRV
MAQDADSAVSYSITEGNDAFLIHPSTGAISVNNVSEFKSFYQLLAKASDGLYKDLATVKI
NVTNITAGGLKFEQGLYAATIEENSMTVKMLAVLRASGSYLNEPLIYSVLNPMGRFAIVP
TSGVLETTGVPFDREEQDVYDIVVEVRDMRSPPCWAITHISVYIADINDNPPRFLNLPHS
MMISEDTEPGDVIFQVMASDSDLGENGSIMYLLEEDFDLFRIDPGDVSLQWPIDFEATNK
YTLTVLATDEGSPSWTTSAELSITVRNRTNPIFQTLLYLLKVPENISPFTTILHVQARNP
EGYRLIYNLEEKNASKNFHIDFKTGVLSVTDLLDYESQTMHLLTVRATDSVTGSFSEAAV
EIEVEDVNDNAPVFSKLTDTVDIPEGLPIGTSVLQISATDRDSGRNRDLTFHIMDFFKID
PQSGLILTTQVLDYEKTKHFQLKIKAIDNGTNPLSSDAYVIVNVTDVNDNPPNFSKTHYQ
ATLDELAKCGHIVIKIQASDPDTRDLQYKILSGNEGRYFAINESSGIIYFSNVCKVDPFY
NLTVAVSDGVFQNTAPVNIDMMNTNKHSPYFNKNIYEAELAENAEAGTRVIAIDPDDGPY
GSVDYTIINKLADDKFSIDKNGQIVTSQPLDRENPSQIAIKVMAKDGGGKVAFCTVKIIL
TDENDNAPQFKASEYQVSIQSTVNKGSPVIQIMAYDADDGKNADVTYEINPFTGIVSVKE
SLIGQENKILNFKVKARDGGLPFYNSTVPVQVKVVPPEVSLPKFSEPLYTFSAAEDISMG
YSLVNGNTVESNRDRVFALDKESGTLLVQKSIDHEKTKWYQIDVIAQDVASLVSVSIQVQ
DVNDNVPVFEANPYKAFLPENMPPGTTVIQVTANDPDQDTNGQVTYTLFSIDSESGWIIT
LRETDCEMTQHYSFTVVATDHGGEVKLSSSVLVEVTVTDENDNPARFTEDVYHGSVMENT
RPGEVIMSLTTVDMDVTKEN
>Ss_XM_014198621
NDLKPLFYPASYNVVIREDAPLKSSVVRVSATDADIGCNAEFYYSFSRAHPFAVDPFSGA
ISLVKRLNHSRAETYDLTVLAEDRTKKISGVHKFGNVARVTVTIEKVSSTSHIIKPLSVV
LAQKDEDEKITPVESVSIVGGDPQRYFGFQVVSTKWVNWSQSPFGFNLSLQAKDKSSPPL
VSPVSEIHIPPYRFLEDIYILTLSEFSPPKTHVIRVSMSPAHLNVTYHIKSNSDFKINPK
TGILVTAKTHIVVEITDENDNPPMFTKPSYQATLPENVPIGSSVLTVSAIDVDRGRNGFV
TYAIANPSPFTIDPISGVISTSEDLDYELMKRWYHLRVWASDSGSPFSHVSECAVTITMS
NVNDNTPLFEQVGCNATIPVDLAVGEPIAELSAVDLDELQQLRYVIESGNDQQLFDIHAV
SGVITLIRQIRLRITATDGKHNSDPSVVTVTVCQETGIFKRLTDKLIHIINRHSPQFGIP
STIDIREDFPLNSTILHFKASDNDTGFNSKLVYAISSGNEDGCFSIGIWSGELQLVCPLD
RETKEFYILNITVYDLGSPQTSAWKFLAVNLLDVNDNRPVFNQYVVHIPENTEVDTTIFQ
VHATDLDSEGNGNILYSMLTLTNLFEINELTGKVKVSGRLDREAFPRHDLKVEARDQSKK
DPQLFSLTDLVVVLEDINDNPPKFVPKIYNIKVPEDFPLGTVLLWVESYDLDLRSAGQIS
YNLKNSENGAFFLDASTGSLTLEKELDFERRQSYNLTVQAIDHGLPWSLSSSCFIEVEVL
DVNENLNKPVFSMFVYEASVMEDAPVGTSVFTLTAADRDLGKDGVVRYHIHDGSGLGVFT
IDEETGVIRTAETLDREAVPHYWLSVYGKDLGTIPLVTWTDIFVEVLDINDNPPQVSQPV
YFGSVLENMPKDKSVFQVTATDVDSSSSPQTYFTINPKTSLDREQKSEHSIEVIVSDNGT
PALRSTSTVIIQVLDENDNRPQFNHKLFQVKLPECRMVAQDDDEGPNAEVTFSLQDNQDK
RFEIHPDTGVVMAGDFTAGNYSILTIKAEDHGSPVRSSTVRLDVEWIPKPPTSDPLTFDE
PHLTFTVMETDPVTHMVGIIATEGGDEERDFDIERNTGSMVIARPLDAGRKSNYNLTVQV
TDGHQVTTTQAYIHVDMNKHRPMFTKSIYEVRVPEDTSPRKDILHISAQDRDVRDQKIPV
KRNFVKAVVYVEDCNDHSPAFMAAGYEGTITDLAAAGTEVHRVKALDKDMGSNAQIIYSL
HSGNVDNTFDIDGELGSIIITKSLDSLPQEQFHLTVKATDQGFPQHSDLCSVYITVLLSD
RTPPRFPSDEYFSEVSEDSPLGTPVITVSAASPSAVHYSIKDGDPNGTFHINAESGVLSV
QMSLNFEECFSYRLKVRASTSAGAWSDTVVYVYVIDENDNPPVFLQEKFHGQISESAHIN
SMVMGESNTPLVIRASDADRDSNSLLVFQILEPEAMKVFKIDPNMGTLSVISEVDFEETP
EFSFSIQVRDSGEPSLYAAEPARVTIRVLDLNDCSPKFARPVYESSIVFPPVREMEVVRV
TAQDADSVVSYSITEGNDAFLIHPSTGTISVNNVSEFKSFYQLLVKASDGLYKDLATVKI
NVTNITAGGLKFEQELYAATIEENSMTVKMLAVLRASGSYLNEPLIYSVLNPMGRFAIVP
TSGVLETTGVPFDREEQDVYDIVVEVRDMRSPPHWAITHVNVYIVDINDNPPRFLNLPHS
MMISEDTDPGDVIFQVMASDSDLGENGSIMYLLEEDFDLFRIDPGDVSLQRPIDFEATNK
YALTVLATDEGSPSWTTSAELSITVRNHTNPIFQTLLYLLKVPENISPFTTILHVQARNP
EGYRLIYNLEEKNASKNFHIEFKTGVLSVTDSLDYESQTMHLLTVRATDSVTGSFSEAVV
EIEVEDVNDNAPVFSKLTDTVDIPEGLPIGTSVLQISATDRDSGRNKDLTFHILDFFKID
PQSGLIVTRQVLDYEKTKHFQLKIKAIDNGTNPLSSDAYVIVNVTDVNDNPPNFSKTHYQ
ATLDELAKCGHIVIKIQASDPDTRDLQYKILSGNEGRYFAINESSGMISFSNVCKVDPFY
NLTVAVSDGVFQNTAPVNIDMMNTNKHSPYFNKNIYEAELAENAEAGTRVIAIDPDDGPY
GSVDYTIINKLADDKFSIDKNGQIVTSQPLDRENPSQIAIKVMAKDGGGKVAFCTVKIIL
TDENDNAPQFKASEYQVSIQSTVNKGSPVIQIMAYDADDGKNADVTYEINPFTGIVSVKE
SLIGQENKILNFKVKARDGGLPFYNSTVPVQVKVVPPEVPLPKFSEPLYTFSAAEDISIG
YRLVNGNTVESNRDRVFALDKESGTLLVQKSIDHEKTKWYQIDVIAQDVASLVSVSIQVQ
DVNDNVPVFEANPYKAFVAENMPPGTTVIQVTANDPDQDTNGQVTYTLFSIDSESGWITT
LRETDCEMTQHYSFTVVATDHGGEVKLSSSVLVEVTVTDENDNPARFTEDVYHGSVMENA
RPGEVIMSLTTVDMDVTKEN
>Lo_Holostei_FAT2_ENSLOCG00000011694_MTNR1D_LG6
NDLKPLFYPASYNVTVKEDTPLRSSVLKVSATDADLGSNGEFYYSFSRSSPFAIDPSTGT
ITLAKKLQYNHTPKYELRVLAEDRTKKIAGVRKFGNDAKVVINVKKVNPEPPVIKSVTIS
TPDGDDEETYAEVESLTIVKGDPQHYFDFQVVATKKLNWLNYPLGFNLSIQAKDKHNPPL
LSEIKAVHIPFPKFEKKIYSVTLSEFSPPNTPVIRVVVNPSPLNVTYHIKKTPDFRINAK
SGLIVIAEAKVTVDIIDENDNAPKFARPSYQGTVLEHVPIGNSILTVTAVDGDTQKNGFI
TYAIANPLPFTIDPFTGVISTSEELDYELMQRWYHLRVWASDSGAPYSHVTECAVTLIMS
NINDNIPEFEKVGCNATIPQDLAVGEIIGVMSAIDLDELQQVRYKMESGNELGLFEISPV
SGKILLKKRISLTITATDGENYAVPTTVNVVVCEDTGVFKKLTEKLIHIINRHSPKFSLP
SSIDVREDMPVNSTILQFKAADEDTGFNGKLVYVISDGNEDGCFTIDMESGEVKLLSPLD
RETTGFYILNITVYDLGISQRSSWKFLAVNVLDVNDNPPRFEQYILTIPENTGIEKSILQ
VKAVDVDLEVNGKIKYSLITETDKFAINDYTGVVRVNKPLDREVSPRYELKIEARDQATV
DPTLFSIAEIVVILEDVNDNPPTFVPKFYKVQVPEDVPIGTIILWVEIYDPDLGSGGQVS
YNLMDNENGAFYLEASIGSLSLEKEMDFEQRQFYNLTIRAVDHGQPRSLSSSCFVEVEVL
DVNENLNAPLFSSFVYKAEVVEDTPVGTSIMSLTAVDKDRGRDGVVRYYIREGSGLGVFS
IDEDTGIIRTADILDRESTPHYWLTVYATDLGAVPLVSWTEVFIEVMDINDNPPEFSQPV
YFGSVLENSPQDKFILRVEASDADIASTQRTYFTIGSKTPLDREQKAEHILEVTVSDNGK
PPLRSTATVIIQVLDVNDNSPRFAHKLFYVRLPEYRMIAHDNDDGPNARVTYSLKEDADN
TFSIDPITGIVSSSNFGPGAYSILTIKATDSGSPNRSSTSRLDVEWIPKPPTSEMLAFDE
PHFNFAVMETDPVTHMVGIISTEGGDSEKEFDIEKNSGSIVIARPLDAGKRSNYNLTVRV
TDGTQSIKTQAYIRVDINKHRPEFLKSHYEVKVPEDTAPWKEILQLSAQDKDVRDQEIPV
KRNFVKVVVHVEDCNDHAPAFMSSRYEGRVLNMATAGAEVLQVKALDKDKGSNAEIIYTF
LSGNTEGAFAIDPKTGRITVAKPLDNLPQENYQITVEATDQGFPQRSDISTVVIHINLSV
ETPPRFLINEYFAEISEAAPVGSPVTTVSASSPSGVRYQIKDGDPNGTFQINSFSGVLST
QKALDFEKNSSYQLEIRGSTLSGTFSDTIVFVYVIDENDNAPSFLREEFIGQISESAHEN
SMVMGELNTPLVIQATDADKDSNALLVYQILEPEVQKVFRIEPSMGTLFLTSSVDFEVTS
EFQFSVQVHDSGEPPLYASKPSKVTVRVLDINDCPPKFLKQQYESSLILPAFQGMEVIKV
LASDADSDVIYSINEGNNAFAIHPSSGLITVNNASNLRQNYQLFVKASDGLYKDTALIKV
NFTSITGHGLVFQNKFYVATVSENSTSVKTLLVVRASGSYLNEPLIYSVSNSDGMFSVIP
TSGVLETTGIPFDRERQDVYDVAVEVRDTRDPPRRALTYVKVYVDDINDNAPEFLNLPYA
VTVQDDADPGDVLFQVTATDKDLGENGAVMFSLQDDFDLFRIDPGDVSLQRSLDFESMNK
YVLTVIASDVGDPSLTSEAELIVQVRNRSNPIFQKLHYLLNIPENISPFTTILHVQARNP
EGYRLIYNLVEENASKNFHIDFKTGVLSVTDFLDYEAQTKHTFTVRATDSVTGTYSEAKV
DIEIEDINDNPPLFQQKTYTAHVSEGSPIGTSVIQVSATDKDSGKNKAILYQIVTFFSVD
ALTGLVVTTHELDYEATQQFHLKIRAIDNGVPPLSSEAFIVVNVSDVNDNPPAFNQAQYD
AALNEMAMCGHIVIKVQASDPDSINLEYMILSGNNDRHFAINHSSGIISFSNVCKLDPFY
NLTIAVSDGVFKRTAPVNINMMNINKHSPHFEQNIYEAELAENAEAGTQVIAIDPDDGPY
GSVDYTIINKLADEKFSIDKNGQIVTTQALDRENPTQIAIKVMAKDGGGKVAFCTVKIIL
TDENDNAPQFKASEYQVSIQSSLSKGSPVIQIMAYDADEGKNADVTYEINPFTGVISVKE
SLVGLENKIFNFKVKARDGGSPYYNSSVPVQLNVVPSEVTLPQFSEPLYTFSASEDIPVG
YSLVEGNTVESNKERVFAVDSDSGTLLVQKSIDHEKTNWYQIDVMAQDVASIVSVSIQVQ
DVNDNSPVFEADPYRAFLTENMPAGTTVIQVTAIDPDTDTNGQVSYRLFMIDNESGWITT
LKETDCETNGFYVFHVVATDHGGKVKLSSSALVNVTITDENDSPPVFTEEVYQGSVVENS
PPGEDITTVSTTDADVSEAN
>Ps_reptilia_FAT2_ENSPSIG00000008111_MTNR1D
NDLKPLFSPPSYKVIVGDDTPPKTAISVVSATDADVGQNAEFYYTLTRSHLFTVHPTSGV
VMTAGKLNSTHRGKHQLQVLAVDRMRKISEGNGFGNLASLVVQVEPSVRKPPAITSVIVT
PSDSDEDLLYAGVDSVDIVAGDPGRHFEFMIVSTKEIDWLANPWGFNLSLQATDKSKPPL
TSQVRVIHIPPSRFEQEVYRARLSEFSPPGSQVTMVKVTPVFPHLKYILRPTPDFKINPQ
TGLITTAYAAVVIDVTDCNNHAPSFTQSSYRDSFNENLPPGTSILTVKATDLDQGENGIV
TYTIANAAPFVIDPFSGVISTSKPMDYELMQRWYHLRVWASDWGSPFRHETEVYVSLILS
NLNDNAPVFEKANCSGSIPRNLSIGHPVVTVSAIDVDELQHVKYKILSGNELQHFDMNPI
SGVLSLRTSLSLQITATDGENDALPTSVNITVCEETGVLQQLTENIIYHVNHHAPRFNFP
RSIDVLETVPVNSTIVDLAAVDPDPGFHGKLVYVIADGNEDSCFTIDIERGFLHVLSPLD
HERTSFYILNITVYDLGTPQKSSWKLLAVNVLDANDNAPKFSQYWAAIPEDVTKGTTVAQ
VRAEDADTDDNGKVKYSLLTPTDKFAINSVTGEVTVTGPLDRELWPRYMLKIEARDQPRM
GHQLFSVTDLVVTLEDVNDNPPRCLPAQNHVKVPEDLPLGTILLFLEAFDPDTGSGGEVK
YSLINNEERTFHMDRLTGALQVEKELDYETRDFYNLTVHVSDGGRPVSRSSFCHVALDVL
DVNENLHPPHFTSFVFSGWVQENSPEGTSVMTVTAQDGDKGKDGELQYSIREGTGLAVFH
IEEDTGTIQTVGPLDRESTSHYWLTVLAVDRGSVPLSSVAEVYIEVTDINDNPPQMSRPI
FFASVMENSPVNTSVLQLDARDPDSSSNAHACFTINPVTQLDREHKAEHILEVVVSDNGD
PTLKSTAKVVVQVLDANDNPPSFPHKLFMVQLLECRVIASDRDVGQNGQVTYSIEENEEG
IFTISPGTGVLFSKAFLASEYNILTVKATDNGSPPLSASVRLHISWVARPPSSEPLAFDE
PHFNFAVMETDPVNHMVGVISVEGGDDDMDFDIEKSTGSMVIARALEAKKKPSYNLTVEV
TDGSSFIRTQAYIHVDINEHRPQFLDSHYEVTIPEDTPPGTEFLRVSATDEDVRDQEVPI
KRNFARVVIHVENCNVHPPRFTRHHYEAEALDSATVGTEVVQVRALDQDQGVNAEIRYSL
QAGDSEGFFSIDSISGIITVSQKLDRFKAERLTLVVKAEDQGFPPLTDSTTVHVHIKPSD
RTPPKFSEAEYIAEISESTAPGSPLLLVSATSMSPVSYDIKEGNEGGVFSMNYQSGLIST
QKNLDFEQVSSYQLKVRGTNMRGAFTDVAVFIYVIDENDNAPAFVKPSFVGWISENAPPQ
SMVMDENNAPLVTQATDADQDSNALLVYEILEPEALKYFTIDPSMGTLTARTDLDYELIP
VFHFSIRVQDRGNPCLFASTPATVIIHVQDVNDAPPVFLKDVYKLSVSLPAHPGMELLAV
RAEDADSEVTYSLAEGNQAFFIHPLTGLISVVNATLLGNYRELTVRASDGLYKSTALVRV
NFTEPQVTALTFDQDLYTATVQENTTDQQTLIVLGVCGNQLNEPLFYSLLNGKERFNLIP
ASGVLQTNCVEFDRETQDTYEVAVEVKDTSNPPRVSQATVQVYVEDTNDNPPQFENVPYY
TSVQEGMEPGDVLFQVFATDRDIGDNGAITYSLAEFYEYFWIDPGDISLKKPLDYQALNK
YTLKVIARDGGEPPLQAEEEVLITVRNKSNPLFQSLYYTVKVPENIPLYTPILHTQARSP
EGLRLIYNIMEEEPLKLFNTDFKTGVLTVTGQLDYESETKHTFTVRATDTVLGSFSEAQV
EVEVEDINDNPPVFSQTLYIASVTEGLPTQTSVVQLFASDKDSGRNKVISYRILKFFNID
PNTGEIATAQVLDHETNHQFHMKIRATDHGVPPLSSEALVVINVADVNDNPPEFSQAQYE
AKVSEMATCGHTVVKVQALDPDSGDLEYVILSGNDKRHFIINSTSGVISMLNRCRLESSY
NLRVSASDGVFKTTVPVFINTTNTNKYSPSFWQNVYEAELAENAEVGTKVIAIDPDDGPY
GTIDYTIINKLAHEKFTIDHKGHIATLQKLDRENSTEIAIKVMAKDGGGKVAFCMVKIIL
TDENDNPPQFKASEYTLSIQSNVSKGSPVIQVLAYDADEGVNADVTYEINAASGVVKVKE
SLIGLENRAFNFKVKAEDSRPPHWNSRVPVSLQIVPREVSLPRFSEPLYTFSASEDLPEG
YSLVKGTTAESNKEEVFTLDKQTGTLKVNKAVDHEKTKWYQIDVMAHELVSLVSVSIQVK
DVNDNKPVFEADPYRAFVTENMPSGTTVIQVTANDQDTGSDGQVTYSLFTIDGETGWITT
LKELDCEAQETYRFYVVATDHGRKVQLSSHTLVEVTVSDENDNAPQFTSEVYKGSVTENA
EPGQIIATFRTTDADLSEQN
>Hs_mammal_FAT2_ENSG0000008657_chr5
NDLKPLFSPPSYRVTISEDMPLKSPICKVTATDADLGQNAEFYYAFTRSEMFAIHPTSGV
VTVAGKLNVTWRGKHELQVLAVDRMRKISEGNGFGSLAALVVHVEPALRKPPAIASVVVT
PPDSNDGTTYAEVESVEVVGGDPGKHFEFSLVSVKDINWMEYLHGFNLSLQARSGSGPYF
YSQIRGFHLPPSKFEKAVYRVQLSEFSPPGSRVVMVRVTPAFPNLQYVLKPSSEFKLNAR
TGLITTASTVVVIDIVDCNNHAPLFNRSSYDGTLDENIPPGTSVLAVTATDRDHGENGYV
TYSIAGALPFSIDPYLGIISTSKPMDYELMKRIYTFRVRASDWGSPFRREKEVSIFLQLR
NLNDNQPMFEEVNCTGSIRQDWPVGKSIMTMSAIDVDELQNLKYEIVSGNELEYFDLNHF
SGVISLKRPFSLKITASDGKNYASPTTLNITVCDKTGVLTQFTKTILYQINHYTPQFHFP
QSIDVLESVPINTPLARLAATDPDAGFNGKLVYVIADGNEEGCFDIELETGLLTVAAPLD
YEATNFYILNVTVYDLGTPQKSSWKLLTVNVKDWNDNAPRFPPYQLTISEDTEVGTTIAE
LTTKDADSEDNGRVRYTLLSPTEKFSLHPLTGELVVTGHLDRESEPRYILKVEARDQPSK
GHQLFSVTDLIITLEDVNDNSPQCITEHNRLKVPEDLPPGTVLTFLDASDPDLGPAGEVR
YVLMDGAHGTFRVDLMTGALILERELDFERRAGYNLSLWASDGGRPLARRTLCHVEVIVL
DVNENLHPPHFASFVHQGQVQENSPSGTQVIVVAAQDDDSGLDGELQYFLRAGTGLAAFS
INQDTGMIQTLAPLDREFASYYWLTVLAVDRGSVPLSSVTEVYIEVTDANDNPPQMSQAV
FYPSIQEDAPVGTSVLQLDAWDPDSSSNYMGFFMIHPVTQLDRENKDEHILEVTVLDNGE
PSLKSTSRVVVGILDVNDNPPIFSHKLFNVRLPEYRLVASDLDEGLNGRVTYSIEDSDEE
AFSIDLVTGVVSSSTFTAGEYNILTIKATDSGQPPLSASVRLHIEWIPWPPSSIPLAFDE
TYYSFTVMETDPVNHMVGVISVEGGDKDMDFDIEKTTGSIVIARPLDTRRRSNYNLTVEV
TDGSRTIATQVHIFMNINHHRPQFLETRYEVRVPQDTVPGVELLRVQAIDQDVRDQEIPI
KRNFVWVTIHVEDGNLHPPRFTQLHYEASVPDTIAPGTELLQVRAMDADRGVNAEVHYSL
LKGNSEGFFNINALLGIITLAQKLDQANHAPHTLTVKAEDQGSPQWHDLATVIIHVYPSD
RSAPIFSKSEYFVEIPESIPVGSPILLVSAMSPSEVTYELREGNKDGVFSMNSYSGLIST
QKKLDHEKISSYQLKIRGSNMAGAFTDVMVVVDIIDENDNAPMFLKSTFVGQISEAAPLY
SMIMDKNNNPFVIHASDSDKEANSLLVYKILEPEALKFFKIDPSMGTLTIVSEMDYESMP
SFQFCVYVHDQGSPVLFAPRPAQVIIHVRDVNDSPPRFSEQIYEVAIVGPIHPGMELLMV
RASDEDSEVNYSIKTGNEAVTIHPVTGSISVLNPAFLGLSRKLTIRASDGLYQDTALVKI
SLTQVLDKSLQFDQDVYWAAVKENLQDRKALVILGAQGNHLNDTLSYFLLNGTDMFHMVQ
SAGVLQTRGVAFDREQQDTHELAVEVRDNRTPQRVAQGLVRVSIEDVNDNPPKFKHLPYY
TIIQDGTEPGDVLFQVSATDEDLGTNGAVTYEFAEDYTYFRIDPGDISLKKPFDYQALNK
YHLKVIARDGGTPSLQSEEEVLVTVRNKSNPLFQSPYYKVRVPENITLYTPILHTQARSP
EGLRLIYNIVEEEPLMLFTTDFKTGVLTVTGPLDYESKTKHVFTVRATDTALGSFSEATV
EVLVEDVNDNPPTFSQLVYTTSISEGLPAQTPVIQLLASDQDSGRNRDVSYQIVKFFQIN
GSTGEMSTVQELDYEAQQHFHVKVRAMDKGDPPLTGETLVVVNVSDINDNPPEFRQPQYE
ANVSELATCGHLVLKVQAIDPDSRDLEYLILSGNQDRHFFINSSSGIISMFNLCKLDSSY
NLRVGASDGVFRATVPVYINTTNANKYSPEFQQHLYEAELAENAMVGTKVIAIDKDSGPY
GTIDYTIINKLASEKFSINPNGQIATLQKLDRENSTEIAIKVMARDGGGRVAFCTVKIIL
TDENDNPPQFKASEYTVSIQSNVSKDSPVIQVLAYDADEGQNADVTYEINPVTGVVKVKD
SLVGLENQTLDFFIKAQDGGPPHWNSLVPVRLQVVPKKVSLPKFSEPLYTFSAPEDLPEG
YSLVRGTTPESNKDGVFSLDPDTGVIKVRKPMDHESTKLYQIDVMAHDVVSLVSVNIQVG
DVNDNRPVFEADPYKAVLTENMPVGTSVIQVTAIDKDTGRDGQVSYRLFAIDSESGWITT
LQELDCETCQTYHFHVVAYDHGQTIQLSSQALVQVSITDENDNAPRFASEEYRGSVVENS
EPGELVATLKTLDADISEQN
>Cm_chondrichthyes_FAT2_SINCAMP00000010918_MTNR1D
NDLRPLFSPVSYTASVGEDTPLRSSVAKVTATDADIGSNGEFYYAFHRTDTFAIHPTSGV
VTLAGSLNLTTARQHKLEILAVDRMMKLHGGRGVGSTSKLTVNVEQGRQELPEILTVHSV
PPGESPSSTLAGVDQVDIIDGDPADYFEFKLISLKDTNWASNDLGYNLSLQARVKSNPTA
NSPVKVIHVPANTFAQDLYEVRLSEIAPPNSPVVLVVARPKHPNVRYHLESGHDFRINPQ
TGLITTISARVVIDLVDANNHAPEFPVSLYQGNVDENVPIGTSILTVKAIDKDQGDNGHV
SYSIANSIPFNIEPFTGTIITSKELDYELMQRVYHLQVWASDWGSPFAYDSEVPVTIYLE
NLNDNNPMFENNKCRGNISRSLGVGDSITTVSAIDADELKEVKYELLSGNEMDFFRLDPT
SGVLELKQPFNLKLTARDGENYASPIYINLTVCEDTGAIKSLAESLLHIINAHTPQFDFP
TSISVRENVPVNSTVLYINVTDPDSGFNGKLIYVISSGNEDSSFVAEMETGRLKVALPLD
YETTRLYTLNVTVYDLGKPQKSSWRPLEVHVLDSNDNKPVFAQYWATVREDAVLGTSVAQ
PKAEDQDEGGNGRVKYSLLTDTDTFAIDEISGTVLVTGKLDRELCPVHFLKVEAKDQSAQ
DDQLSSVVDLIVALEDVNDNPPRFVPSHYTAKVPEDVPVGTVIVWLEAYDPDLGLGGQVN
YSLMDNSDSTFRVDKVTGAVRVNKQLDFERRDLYNLTARAVDGGKPQSLSSKCYVAIEVL
DVNENLHPPRFPSFVIQGSVSEDAPVGTSVVTLTAQDGDPGKDGEIRYLIKGGSGLGVFS
INEKTGVMQTTMILDRETVPHYWLTVHATDSGLFPTVASTEVFISITDVNDNPPQTTEPV
YYTSITENSPKGQSVLRIEAHDPDSSSSPRGFFAIDPKTRVDREKRDEHILEVTVKDNGD
PPRQSRTKVMVGVVDENDNAPRFPEVLYNVRLPEYRVIASDRDVGPNGDITYSIEDPEEG
KFYINPKSAMVSSRAFTAGDYDILTIRASDNGNPQKSTTVRLHIEWIETPPSTEPLLFDE
PHFTFAVMETDPVNHMVGVTSTEGGNNNEEFEIEKNTGSITIAKPLNASLMSNYNLTVKV
TDGTNAVTTQAYIKVDINDHRPQFSAREYEVRIPEDIAPPAEILRVKAHDKDVRDQEIPV
KRNFVRINIIVEDSNDYPPKFIQHSYKASVAESTDIGSEVLQVIATDSDTGVNAEIVYSI
QSGNSGNMFAIDPVSGKITVTKEMDQAVKGTYNLTVKAEDRGFPQLSTVTSAYIVVLVSD
NSPPRFLMSEYYAEISEAISTGSSVVTVTATSQSAVTYEIKDGNTDQAFRINPYSGLVSV
HKALDFETIAAYRLTVQGANMAGLSSSLTVFIDVIDENDNAPVFVQSRYVGRINENSPVN
SVVLSNGHTPLVIEAQDRDRDANALLVYQIVEPEAQKYFTIDPSMGTLSTASPIDRETHP
VFHLTVQVRDSGRPRRYATEVANVTVMVTDVNDCPPRFEKDVYETTLLVPAHDGTRVLTV
KAEDADSNVTYSILEGNDAFTVGAASGLISVNDASRLENHHELTVRATDGMYKSSAVVKI
NTVELPETGLRFALGSQSLSVSEDSRSMETLGVVKASGNQLNEPLFYSVLNPDAKFKVVR
TSGAFQTTGVPCDREEVAEFEFVVEARDARSPPRVARTLVKVSVEDVNDNPPVFVNLPYV
TTVPEDAEPGDVLFQVSAVDKDAGDNAVIHYSLANSYRHFWMDPGDISLSEHLGPDALDK
YVLTVTAQDRGSPPLFVQTEVVITVRDKSTPVFEKMYYRVRVAENISPYTPILHVHAISP
SGFRVIYNIVTENALRLFAIEFKAGVLSVVDALDYESQTQHVVTVRATDSMTGSSAEAVV
EIEVQDVNDNPPIFTARAYGAVLSEASIVGTSVAQVKATDADSGRNKAISYQFVEYFYID
SNSGLVTTARALDHEKIQHYALVVRAVDNGIPPLSSDVLLNVNVSDFNDNPPMFQQDQYA
TTISEVATCGHFVIRVQASDADSMDLEYVILEGNEQRHFTIGTKSGIISVSNSCKLRSNY
HLNVSVSDRVYRRSIPVRINTSQTNKYAPVFDQSVYEVELPENAEVGTHVIAVDPDAGPY
GSIDYTIINKLAREKFSIDGKGRILTSQKLDRENSTEIAIKVMAKDRGGKVDFCTVNIIL
TDKNDNAPQFQAAEYNIHIPANTFKGAPVIQIVAIDADEGINADVVYDINPVTGFITIKE
SLVGLENSSFTYHVKAQDGGFPQRDSCVPVRVKVIPPELSIPRFSEPLYSFSASEDLPTG
YSLVRGNTAESNKGGVFALDQKTGTLKIERSIDHEKTKWYQIDVIATEVASSVSINIQVK
DVNDNHPVFEANPYKAFIPENLPAGTTVIQVTANDQDTGTNGHVSYRLFAIDGERGWLTT
LRELDCEAKAFYKVAVVAVDHGGRVQLSSTAVVEVEVSDENDNPPQFTSGVYRGTVSEDS
EPGETVAFLTMTDADMTDPN
